1 TITLE

2 Comparative proximity biotinylation produces an inventory of RAB18-interactions and  
3 implicates RAB18 in cholesterol mobilization

4

5 RUNNING TITLE

6 GEF-dependent RAB18 interactions

7

8 AUTHORS

9 Robert S. Kiss\*<sup>1</sup>, Jarred Chicoine<sup>1</sup>, Robert Sladek<sup>1</sup>, He Chen<sup>1</sup>, Alessandro Pisaturo<sup>1</sup>,  
10 Cyril Martin<sup>1</sup>, Jessica D. Dale<sup>2</sup>, Tegan A. Brudenell<sup>2</sup>, Archith Kamath<sup>3,4</sup>, Jimi C.  
11 Wills<sup>3</sup>, Alex von Kriegsheim<sup>3</sup>, Tommy Nilsson<sup>1</sup>, Eamonn Sheridan<sup>2</sup>, Mark T.  
12 Handley\*<sup>2</sup>

13

14 AFFILIATIONS

15 <sup>1</sup>Research Institute of the McGill University Health Centre

16 1001 boul Decarie

17 Glen Site Block E

18 Montreal, QC

19 H4A 3J1

20 Canada

21

22 <sup>2</sup> Leeds Institute of Medical Research (LIMR)

23 St James's University Hospital

24 Leeds LS9 7TF

25 United Kingdom

26

27 <sup>3</sup>Cancer Research UK Edinburgh Centre

28 MRC Institute of Genetics & Molecular Medicine

29 The University of Edinburgh

30 Western General Hospital

31 Edinburgh EH4 2XR

32 United Kingdom

33

34 <sup>4</sup>Medical Sciences Division

35 University of Oxford

36 Oxford OX3 9DU

37 United Kingdom.

38

39 \*authors contributed equally

40

41 CORRESPONDING AUTHORS

42 Robert S. Kiss: [robert.kiss@mcgill.ca](mailto:robert.kiss@mcgill.ca)

43 Mark T. Handley: [m.handley@leeds.ac.uk](mailto:m.handley@leeds.ac.uk)

44

45 KEYWORDS

46 RAB18, BioID, Cholesterol, SPG20, SEC22A, TMCO4

47

48 SUMMARY STATEMENT

49 We used proximity biotinylation together with guanine nucleotide exchange factor  
50 (GEF)-null cell lines to discriminate functional RAB18-interactions. We anticipate that  
51 this approach will be broadly applicable in small GTPase research.

52

53 ABSTRACT

54 Loss of functional RAB18 causes the autosomal recessive condition Warburg Micro  
55 syndrome. To better understand this disease, we used proximity biotinylation in  
56 HEK293 and HeLa cells to generate an inventory of potential RAB18 effectors. In  
57 HeLa cells, we expressed BirA\*-RAB18 in cells in which RAB18-guanine nucleotide  
58 exchange factor (GEF) activity was disrupted with CRISPR. We found that most  
59 RAB18-interactions are regulated independently by its different GEFs; the binary  
60 RAB3GAP1-RAB3GAP2 complex and the TRAPPC9-containing TRAPP II complex.  
61 RAB3GAP-dependent RAB18 interactions included a group of microtubule-  
62 interacting/membrane shaping proteins, a group of proteins involved in membrane  
63 tethering and docking, and a group of lipid-modifying/lipid transport proteins. We  
64 demonstrate that GEF-dependent Rab-interactions are highly amenable to  
65 interrogation by proximity biotinylation. Further, we provide confirmatory evidence for  
66 several of the interactors (SPG20/SPART, SEC22A and TMCO4) as well as  
67 functional evidence supporting a role for RAB18 in modulating the close apposition  
68 of membranes and in cholesterol mobilization.

69

## 70 INTRODUCTION

71 Rab Proteins are a large subfamily of small GTPases with discrete roles in  
72 coordinating membrane trafficking (Zhen and Stenmark, 2015). They associate with  
73 cellular membranes as a result of their C-terminal prenylation and like other small  
74 GTPases, adopt different conformations and enter into different protein-protein  
75 interactions according to whether they are GDP-, or GTP-bound. For Rab proteins,  
76 cycles of GTP binding and hydrolysis are accompanied by cycles of membrane  
77 association and dissociation that serve to promote the targeting of particular Rab  
78 protein isoforms to particular membrane compartments. Although they possess  
79 some intrinsic GTP-hydrolysis activity, their *in vivo* nucleotide-bound state is tightly  
80 governed in cells by two classes of regulatory proteins. Guanine-nucleotide  
81 exchange factors (GEFs) catalyse the exchange of bound GDP for GTP while  
82 GTPase-activating proteins (GAPs) promote the hydrolysis of bound GTP to GDP  
83 (Lamber et al., 2019, Barr and Lambright, 2010). The dissociation of Rab proteins  
84 from membranes is mediated by GDP-dissociation inhibitor (GDI) proteins. GDIs  
85 sequester GDP-bound Rabs in the cytosol, and are also involved in their  
86 reassociation with membranes (Zhen and Stenmark, 2015).

87 Rab proteins have a variety of roles in the regulation of processes required to confer  
88 compositional identity to membranous organelles and to subdomains within them.  
89 These include membrane remodelling and the establishment of membrane contact  
90 sites (Bui et al., 2010, Raiborg et al., 2015, Rocha et al., 2009, Sobajima et al.,  
91 2018). Where exchange between organelles is mediated by carrier vesicles, these  
92 processes are important in vesicle budding and transport, tethering at the  
93 appropriate target membrane, and fusion (Cai et al., 2007). Under other  
94 circumstances, membrane contact sites may be established to mediate direct fusion  
95 between organelles or to facilitate the transfer of lipids and ions (Wu et al., 2018,  
96 Langemeyer et al., 2018, Wickner, 2010). Rab proteins fulfil their roles by way of  
97 protein-protein interactions with interacting partners termed 'effectors'. These  
98 comprise an array of phylogenetically unrelated protein classes and can serve a  
99 range of molecular functions. As such, they are most usually identified biochemically.

100 Biochemical identification of Rab effectors is challenging; Rab-effector interactions  
101 are usually GTP-dependent and are often highly transient. Immunoprecipitation,  
102 affinity purification and yeast-2-hybrid approaches have each been used but may be

103 more or less effective depending on the Rab isoform studied (Christoforidis et al.,  
104 1999, Fukuda et al., 2008). One newer approach that has yielded identification of a  
105 number of novel interactions is 'BioID' proximity biotinylation utilizing Rab proteins  
106 fused to mutant forms of the promiscuous biotin ligase BirA\*; the Rab fusion protein  
107 biotinylates proximal proteins which are then purified on streptavidin and identified  
108 through mass spectrometry (Gillingham et al., 2019, Liu et al., 2018, Roux et al.,  
109 2012). Biotin labelling occurs in a relatively physiological context, and prospective  
110 effectors can be purified under high stringency conditions. However, a drawback of  
111 the technique is that it does not discriminate between close associations resulting  
112 from functional protein-protein interactions and those resulting from overlapping  
113 localizations.

114 RAB18 is a ubiquitously expressed ancestral Rab protein that localizes to the *cis*-  
115 Golgi, endoplasmic reticulum (ER) and lipid droplets (LDs)(Martin et al., 2005, Ozeki  
116 et al., 2005, Gerondopoulos et al., 2014, Handley et al., 2015). Previous work has  
117 suggested that it functions in the regulation of lipolysis, and lipogenesis (Martin et al.,  
118 2005, Ozeki et al., 2005, Pulido et al., 2011), trafficking between the Golgi and  
119 endoplasmic reticulum (ER) (Dejgaard et al., 2008, Handley et al., 2015), ER  
120 structure (Gerondopoulos et al., 2014), exocytosis (Vazquez-Martinez et al., 2007)  
121 and autophagy (Bekbulat et al., 2018, Feldmann et al., 2017). RAB18 deficiency or  
122 its dysregulation cause the autosomal recessive condition Warburg Micro syndrome  
123 (Aligianis et al., 2005, Bem et al., 2011, Borck et al., 2011, Handley and Sheridan,  
124 2018, Liegel et al., 2013)(MIMs 600118, 614222, 614225, 615663, 212720).

125 In order to address how RAB18 coordinates and performs its roles, we used BioID to  
126 generate an inventory of its potential effectors. To discriminate functional  
127 interactions, we used complementary comparative analyses in HEK293 and HeLa  
128 cells. Known RAB18 effectors were more strongly labelled by a fusion of BirA\* and  
129 wild-type RAB18 than by one incorporating an inactive form, RAB18(Ser22Asn),  
130 which is deficient in nucleotide-binding. Similarly, BirA\*-RAB18 labelled known  
131 effectors more strongly in wild-type cells than in cells in which RAB18-GEF activity  
132 was disrupted with CRISPR. Interestingly, disruption of different GEF complexes  
133 largely affected different sets of RAB18 interactions.

134 A restricted set of interactions were dependent on the binary RAB18-GEF complex  
135 made up of RAB3GAP1 and RAB3GAP2 (Gerondopoulos et al., 2014). These

136 included known and novel interactors in discrete functional groups. We present direct  
137 validation for several examples including the microtubule-binding protein  
138 SPG20/SPART, the SNARE protein homologue SEC22A and an orphan lipase  
139 TMCO4. Our data strongly support a previous suggestion (Xu et al., 2018) that  
140 RAB18 effectors act collectively in lipid mobilization. The combined data elaborate a  
141 model for RAB18 function and provide groundwork for future investigations. In  
142 particular, a putative role in cholesterol mobilization and biosynthesis is highlighted.  
143

## 144 RESULTS

145

### 146 An inventory of nucleotide-binding-dependent RAB18-associated proteins in HEK293 147 cells

148 We first generated HEK293 cells stably expressing BirA\*-tagged fusion proteins of  
149 wild-type RAB18, nucleotide-binding deficient RAB18(Ser22Asn) or GTP-hydrolysis  
150 deficient RAB18(Gln67Leu) using the Flp-In system. We then carried out proximity-  
151 labelling, affinity purification and mass spectrometry of biotinylated proteins as  
152 previously described (Roux et al., 2018, Roux et al., 2012). Following removal from  
153 the dataset of previously identified non-specific binders from an in-house database, a  
154 total of 98 proteins were identified as associating with RAB18 across all samples  
155 (see Table S1).

156 The most comprehensive annotation of candidate RAB18 effectors thus far was  
157 made in the 2014 paper by Gillingham et al., which utilized an affinity purification-  
158 mass spectrometry (AP-MS) approach and the *Drosophila* RAB18 orthologue  
159 (Gillingham et al., 2014). In that study, a total of 456 proteins were identified as  
160 interacting with RAB18. However, only 14 of these were well represented in terms of  
161 spectral counts, exhibited low non-specific binding to GST/Sepharose and showed  
162 low binding to other Rab protein isoforms. We took these 14 proteins as the most  
163 plausible physiological RAB18 interactors. Orthologues of 7 of these 14 proteins  
164 were also represented in our BioID data. The number of spectral counts recorded for  
165 these 7 proteins did not clearly distinguish them from the remainder of this BioID  
166 dataset. We therefore proceeded by comparing their differential labelling by the  
167 different RAB18 fusion proteins.

168 We began analyses by exploring the possibility that BirA\*-RAB18(Gln67Leu) fusion  
169 protein would produce enhanced biotinylation of RAB18-effectors (as compared to  
170 BirA\*-RAB18(WT)). We normalized total spectral counts between the BirA\*-  
171 RAB18(Gln67Leu) and BirA\*-RAB18(WT) datasets and then calculated mutant:wild-  
172 type ratios for each RAB18-associated protein (Table S1). Association ratios for  
173 known RAB18-interactors ranged from 0.1-1.49 indicating that RAB18 associations  
174 were altered by the Gln67Leu variant, but not predictably so.



175 We next compared the BirA\*-RAB18(Ser22Asn) and BirA\*-RAB18(WT) datasets  
176 (Figure 1, Table S1). The RAB18-GEF subunits RAB3GAP1 and RAB3GAP2  
177 showed association ratios >1 consistent with the high affinity of Rab-GEFs for  
178 cognate Rabs in their nucleotide-free state. Since most effector-interactions are  
179 GTP-dependent, we ranked other prospective RAB18-interactors according to those  
180 that showed the lowest association ratios. Figure 1B shows the 28 of 98 proteins  
181 with BirA\*-RAB18: BirA\*-RAB18(Ser22Asn) association ratios <0.5. These include  
182 the remaining 5 common interactors from the Gillingham et al. study, several of  
183 which have association ratios of zero, indicating that labelling by BirA\*-  
184 RAB18(Ser22Asn) was absent. These data suggest that comparison of labelling by  
185 wild-type and nucleotide-binding-deficient BirA\*-Rab fusion proteins can be an  
186 effective means to distinguish putative effectors.

187

#### 188 An inventory of RAB18-GEF-dependent RAB18-associated proteins in HeLa cells

189 We had previously used CRISPR to generate a panel of clonal, otherwise isogenic,  
190 HeLa cell lines, null for RAB18 and a number of its regulators (see Figure S1).

191 Having shown that the BirA\*-RAB18(WT): BirA\*-RAB18(Ser22Asn) comparison in  
192 HEK293 cells was informative, we carried out similar comparisons between BioID-  
193 labelling in wild-type and RAB18-GEF deficient HeLa cells (Figure 2A). Since GEF  
194 activity promotes Rab GTP binding, and this is usually necessary for effector  
195 interactions, these interactions would be attenuated in GEF-null cells. RAB3GAP1  
196 and RAB3GAP2 are each essential subunits of a binary RAB18-GEF complex  
197 whereas TRAPPC9 is reported to be essential for the RAB18-GEF activity of a  
198 different GEF, the multisubunit TRAPPII complex (Gerondopoulos et al., 2014, Li et  
199 al., 2017). We therefore carried out proximity labelling using transient expression of  
200 the same exogenous BirA\*-RAB18 construct in wild-type cells and in RAB3GAP1-,  
201 RAB3GAP2- and TRAPPC9-null cell lines.

202 Prior to mass-spec analysis, samples from each of the streptavidin pull-downs were  
203 subjected to Western blotting to ensure comparable BirA\*-RAB18 expression (Figure  
204 S2A). Label-free quantitative proteomics analyses were used to calculate 'LFQ  
205 intensities' (Cox et al., 2014) for each RAB18-associated protein, which were then  
206 normalized in each experiment according to the quantity of RAB18 found in each

207 sample. Samples from three independent experiments were analysed, and pull-down  
208 samples from untransfected biotin-treated cells were used as controls in each case.  
209 After filtering the data to remove known mass-spec contaminants, and any protein  
210 identified at a high level in control samples, a total of 584, 483 and 506 RAB18-  
211 associated proteins were identified in each experiment. A total of 457 proteins were  
212 present in two or more of the replicate experiments (see Table S2). Orthologues of  
213 10 of the 14 putative RAB18-interacting proteins identified by Gillingham et al. were  
214 identified in the HeLa cell BioID dataset including all 7 of those also identified in the  
215 HEK293 cell dataset. However, as in that dataset, these were not distinguished by  
216 their comparative abundance.

217 Different Rab-GEF complexes may operate in distinct subcellular localizations and  
218 coordinate associations with different effectors (Carney et al., 2006). Therefore, we  
219 assessed whether non-zero intensities for each RAB18-associated protein correlated  
220 between samples (Figure 2B, Figure S2B). Very strong correlations between protein  
221 intensities from RAB3GAP1- and RAB3GAP2-null cells indicated that loss of either  
222 protein had a functionally equivalent effect ( $R^2=0.99$ , see Figure 2B). In contrast,  
223 intensities from RAB3GAP1- and TRAPPC9-null cells were much more poorly  
224 correlated ( $R^2=0.73$ , see Figure S2B). We therefore considered RAB3GAP- and  
225 TRAPPC9-dependent RAB18-associations separately.

226 Of the 457 proteins identified in two or more independent experiments, only 25  
227 showed an association ratio  $<0.5$  in the absence of functional RAB3GAP (Figure 2C-  
228 D). These included orthologues of 9 of the 10 proteins identified in the Gillingham et  
229 al. study. Thus, our approach was extremely powerful in discriminating putative  
230 effector proteins. 133 proteins showed an association ratio  $<0.5$  in the absence of  
231 functional TRAPPC9 including the remaining common RAB18-interactor from the  
232 Gillingham et al. study (see Table S2). There was only limited overlap between  
233 RAB3GAP- and TRAPPC9-dependent associations (Figure 2C). Indeed, among the  
234 28 nucleotide-binding-dependent RAB18 associations identified in HEK293 cells, 6  
235 were also RAB3GAP-dependent, and 7 were TRAPPC9-dependent in HeLa cells  
236 respectively, but none were both (Figure 1B). Among the 25 RAB3GAP-dependent  
237 associations in HeLa cells, only 5 were also TRAPPC9 dependent (Figure 2C, Table  
238 S2).

239 One of the TRAPPC9-dependent RAB18 associations was that with TBC1D5, a Tre-  
240 2/Bub/Cdc16 (TBC) domain-containing RAB-GAP with a well characterised role in  
241 regulation of RAB7 (Jia et al., 2016, Jimenez-Orgaz et al., 2018, Seaman et al.,  
242 2009). This was a strong candidate as a RAB18 regulator or effector since it had  
243 also been identified in the HEK293 dataset as well as in several previous studies  
244 (Gillingham et al., 2019, Gillingham et al., 2014). We generated TBC1D5-null HeLa  
245 cells, and first tested whether RAB7 and RAB18 dynamics were altered in these cells  
246 using fluorescence recovery after photobleaching (FRAP). RAB7 dynamics were  
247 substantially different in the TBC1D5-null cells as compared to those in wild-type  
248 cells, consistent with reduced RAB7 GTP-hydrolysis resulting in its reduced GDI-  
249 mediated exchange between membrane and cytosolic compartments (Figure S3A).  
250 In contrast, RAB18 dynamics were unchanged in TBC1D5-null cells compared to  
251 controls (Figure S3B). Further, RAB7 dynamics were unchanged in RAB18-null cells  
252 compared to controls, indicating that RAB18 is not required for TBC1D5 activity  
253 (Figure S3A). These data do not exclude TBC1D5 as a potential RAB18 effector, but  
254 argue against a role for RAB18 in RAB7-regulation under resting conditions.

255

#### 256 Validation screening of RAB3GAP-dependent RAB18 associations

257 Our continued study focused on the 25 RAB3GAP-dependent RAB18 associations  
258 identified in HeLa cells on the basis that these included the majority of known RAB18  
259 effectors together with a number of promising candidate effectors not previously  
260 identified. Encouragingly, many of them also appear to share interconnected  
261 functions and fell into three main groups (Figure 2D). A group of proteins involved in  
262 membrane shaping, cytoskeletal remodelling and in membrane-microtubule contacts  
263 included SPG20, BICD2, REEP4, CAMSAP1 and FAM134B. Of these, SPG20 was  
264 previously found to interact with RAB18 (Gillingham et al., 2014), BICD2 interacts  
265 with RAB18 among a number of Rab isoforms (Gillingham et al., 2019, Gillingham et  
266 al., 2014) and REEP4 was previously shown to interact with RAB3GAP (Tinti et al.,  
267 2012). Although not previously linked to RAB18, CAMSAP1 and FAM134B were  
268 each identified in both HEK293 and HeLa datasets. Next, a group of proteins  
269 involved in establishing membrane contacts included components of the NRZ/Dsl1  
270 membrane-tethering complex, ZW10, RINT1 and NBAS, the Sec1/Munc18 (SM)  
271 protein SCFD2 and SNAP-REceptor (SNARE) proteins STX18 and BNIP1. These

272 proteins have been previously studied in the context of RAB18 (Gillingham et al.,  
273 2019, Gillingham et al., 2014, Li et al., 2019, Xu et al., 2018, Zhao and Imperiale,  
274 2017). Also in this group were the SNARE protein homologue SEC22A and the ER-  
275 resident multispinning transmembrane protein WFS1, which regulates membrane  
276 contacts between the ER and mitochondria (Angebault et al., 2018). These latter  
277 proteins had not been linked to RAB18 previously. The third group of proteins  
278 associated with RAB18 were a number of lipid transport, exchange and modifying  
279 proteins, C2CD2L, C2CD2, ORP2/OSBP2, INPP5B, EBP and TMCO4.  
280 Interestingly, all but TMCO4 have related lipid species as their known substrates.  
281 C2CD2 and C2CD2L are thought to mediate phosphatidylinositol (PI) transfer  
282 between apposed membranes (Lees et al., 2017), ORP2 has recently been shown to  
283 exchange PI(4,5)P<sub>2</sub> and cholesterol and INPP5B hydrolyses PI(4,5)P<sub>2</sub> to PI(4)P  
284 (Wang et al., 2019). EBP is a D8-D7 Sterol Isomerase involved in cholesterol  
285 biosynthesis (Silve et al., 1996). Various members of the OSBP family interact with  
286 Rab proteins (Gillingham et al., 2019, Johansson et al., 2005), and a number of Rab  
287 isoforms interact with INPP5B (Fukuda et al., 2008, Williams et al., 2007), though  
288 associations with RAB18 have not been previously reported.

289 For initial validation of our HeLa dataset, we first carried out an additional  
290 independent BioID experiment with wild-type and RAB3GAP1-null cells and  
291 subjected the resulting samples to Western blotting for selected RAB18-associated  
292 proteins (Figure 3A). As with the mass spectrometry, these proteins showed either  
293 complete (RAB3GAP1, RAB3GAP2, ZW10) or partial (SPG20, STX18) dependence  
294 on RAB3GAP for their RAB18 association.

295 Since RAB18 and its regulators are linked to Warburg Micro syndrome, we next  
296 asked whether the putative RAB18 effectors were linked to any diseases with  
297 overlapping clinical features (Figure 3B). Micro syndrome is a clinically distinctive  
298 disorder characterised by intellectual disability (ID), postnatal microcephaly, brain  
299 malformations, ascending spastic paraplegia, neuropathy, hypogonadism and eye  
300 abnormalities that include congenital bilateral cataracts, microphthalmia,  
301 microcornea and optic atrophy (Handley and Sheridan, 2018). Among the  
302 RAB3GAP-dependent RAB18 associations identified in the BioID screen, we noted  
303 that several are encoded by disease-associated genes or their homologues. In  
304 common with Micro syndrome, diseases linked to *SPG20*, *BICD2*, and the *REEP4*

305 homologues *REEP1* and *REEP2* are associated with ascending paraplegia  
306 (hereditary spastic paraplegia/HSP). *FAM134B* is associated with sensory and  
307 autonomic neuropathy, while the eye features of Micro syndrome overlap a different  
308 set of genes. *EBP* is linked to microphthalmia, microcornea and cataracts as well as  
309 to brain malformations like those in Micro syndrome. Both *WFS1* and *NBAS* have  
310 been linked to conditions associated with optic atrophy, and both *WFS1* and the  
311 INPP5B homologue *OCRL1* are linked to conditions associated with congenital  
312 cataracts.

313 Given the suggestive convergences in protein function and gene-disease-  
314 associations, we proceeded to examine the subcellular localizations of 12 putative  
315 effectors for which antibodies were available (Figure 3C-D). To determine whether  
316 the localization of these proteins was altered in cells lacking RAB18, we analysed  
317 wild type and RAB18-null lines in each case. In order to directly compare cells of  
318 different genotypes under otherwise identical conditions, we labelled them with  
319 CellTrace-Violet and CellTrace-Far Red reagents before seeding, immunostaining  
320 and imaging them together. Since RAB18 can localize to LDs, we analysed both  
321 untreated cells (Figure 3C) and cells loaded with oleic acid and labelled with  
322 BODIPY-558/568-C12 (Figure 3D).

323 We observed a variety of staining patterns for the different putative effector proteins.  
324 These ranged from staining that was enriched at the perinuclear region of cells, to  
325 staining that appeared reticular, to staining that appeared more diffuse (Figure 3C).  
326 Each staining pattern was compatible with the known localization of RAB18, which is  
327 distributed between *cis*-Golgi, ER and cytosolic compartments (Handley et al., 2015).  
328 Staining patterns for individual proteins were similar in the HeLa cells and also in  
329 wild-type and RAB18-null RPE1 cells generated to provide biological replicates  
330 (Figure S4). In lipid-loaded cells, we observed that the localizations of proteins with  
331 reticular staining patterns overlapped with LDs, but they did not obviously shift to  
332 adopt an LD localization. However, the two proteins that showed the most diffuse  
333 staining patterns in untreated cells - ZW10 and SPG20 - appeared enriched in the  
334 vicinity of LDs in lipid-loaded cells (Figure 3D).

335 We saw no evidence for dramatic changes in protein localizations in RAB18-null  
336 cells as compared to their wild-type counterparts. Fluorescence intensities in RAB18-  
337 null and wild-type cells were also generally similar, except in the case of staining for

338 SPG20, in which it appeared lower in RAB18-null HeLa cells than in wild-type cells  
339 (Figure 3C).

340

341 Levels of SPG20 are significantly reduced in RAB18-null and TBC1D20-null cells

342 In a RAB18-null mouse model of Warburg Micro syndrome, peripheral nerves have a  
343 disordered cytoskeleton, and there is a striking accumulation of microtubules at  
344 motor nerve terminals (Carpanini et al., 2014). Therefore, interactions between  
345 RAB18 and microtubule-binding proteins is of particular interest. To confirm the  
346 reduction in levels of SPG20 we observed in RAB18-null HeLa cells, we used  
347 quantitative fluorescence microscopy (Figure 4A-C). The SPG20 antibody used in  
348 this study has previously been used for this purpose (Nicholson et al., 2015).  
349 However, to confirm its specificity and also to determine the levels of non-specific  
350 background produced in our experiments, we first analysed SPG20-null cells (Figure  
351 4A-B). Measured fluorescence intensity of SPG20-null cells provided a baseline  
352 level, above which fluorescence levels are proportional to levels of SPG20. In  
353 RAB18-null cells, SPG20 fluorescence was reduced to  $67.16 \pm 3.77\%$  (s.e.m.,  
354  $p < 0.001$ ) of that in wild-type cells (Figure 4C).

355 To determine whether levels of SPG20 were altered by disrupted RAB18 regulation,  
356 we next compared SPG20 fluorescence of wild type, RAB3GAP1-, RAB3GAP2- and  
357 TBC1D20-null cells. Loss of the RAB18-GEF subunits RAB3GAP1 or RAB3GAP2  
358 did not significantly affect levels of SPG20, whereas loss of the RAB18-GAP  
359 TBC1D20 led to a reduction comparable to that in RAB18-null cells ( $57.48\% \pm 2.57$   
360 (s.e.m.,  $p < 0.00005$ ). To rule-out the possibility that reduced SPG20 levels in RAB18-  
361 and TBC1D20-null HeLa cells were the result of clonal variation, we analysed the  
362 corresponding panel of RPE1 cell lines. However, because the RPE1 cells were less  
363 amenable to comparative immunofluorescence experiments than HeLa cells, we  
364 used LFQ analysis of whole cell lysates. As in the HeLa cells, levels of SPG20 were  
365 significantly reduced in RAB18- and TBC1D20-null RPE1 cells compared to wild-  
366 type controls ( $p < 0.05$  following FDR correction), but not in the other genotypes  
367 tested (Figure 4D, Table S3).

368 RAB18, TBC1D20 and the RAB3GAP complex have all been linked to roles in  
369 proteostasis and autophagy (Bekbulat et al., 2018, Feldmann et al., 2017, Sidjanin et

370 al., 2016, Spang et al., 2014). It was therefore possible that reduced SPG20 levels in  
371 RAB18- and TBC1D20-null cells were the result of widespread dysregulation of  
372 proteostasis. To assess this possibility, we compared LFQ data from wild-type and  
373 TBC1D20-null RPE1 and HeLa cells (Tables S3 and S4). Following FDR correction,  
374 only a small number of proteins showed significantly altered levels in each cell type  
375 and there was limited overlap between cell types. This is in-line with a recent study  
376 showing a compensatory mechanism maintains levels of basal autophagy when  
377 RAB18 is absent or dysregulated (Bekbulat et al., 2018). Thus, dysregulation of  
378 SPG20 levels most likely arises from a discrete mechanism.

379 Discrete changes in SPG20 levels in RAB18- and TBC1D20-null cells together with  
380 the previous report of a RAB18-SPG20 interaction (Gillingham et al., 2014) provided  
381 strong evidence for a functional relationship between these proteins. We therefore  
382 carried out co-expression experiments to determine whether they colocalize in cells.  
383 Coexpression of mCherry-RAB18 and mEmerald-SPG20 in HeLa cells showed that,  
384 as previously reported, mCherry-RAB18 adopts a largely reticular localization  
385 (Gerondopoulos et al., 2014) whereas mEmerald-SPG20 appears largely diffuse  
386 (Eastman et al., 2009)(Figure 4E). We did not observe any clear colocalization  
387 between the proteins or any relocalization of mEmerald-SPG20 in cells expressing  
388 mCherry-RAB18. Since both RAB18 and SPG20 localize to LDs, we next explored  
389 whether the localization of either protein to LDs was dependent on the other. In oleic  
390 acid/BODIPY-558/568-C12-loaded HeLa cells, we found that mEmerald-SPG20  
391 became concentrated around LDs, but that its localization was similar in both wild-  
392 type and RAB18-null cells (Figure 4F, left panels). Similarly, EGFP-RAB18 was  
393 enriched around LDs in both wild-type and SPG20-null cells (Figure 4F, right  
394 panels).

395 Collectively, our findings suggest that RAB18 and SPG20 become localized to LDs  
396 independently, and that any RAB18-SPG20 interaction is likely to be transient. The  
397 reduced levels of SPG20 in RAB18- and TBC1D20-null cells seem likely to result  
398 from its reduced stability, and it is intriguing that a transient interaction could  
399 influence this. Nevertheless, this is consistent with the involvement of TBC1D20-  
400 catalysed RAB18 GTP-hydrolysis and accompanying conformational change.

401

402 SEC22A associates with RAB18 and its knockdown causes altered LD morphology

403 The most studied group of RAB18 effector proteins to date are the tethering factors  
404 ZW10, NBAS and RINT1, which together comprise the NRZ/Dsl1 complex  
405 (Gillingham et al., 2014, Li et al., 2019, Xu et al., 2018, Zhao and Imperiale, 2017).  
406 The NRZ complex regulates assembly of an ER SNARE complex containing STX18.  
407 The canonical, fusogenic, form of this complex contains STX18, BNIP1, USE1 and  
408 SEC22B (Spang, 2012, Tagaya et al., 2014). However, it has been proposed that  
409 SEC22B is dispensable for the functions of RAB18, the NRZ complex, STX18,  
410 BNIP1 and USE1 in regulating LDs (Xu et al., 2018). Rather than promoting  
411 membrane fusion it is suggested that, in the absence of SEC22B, these proteins can  
412 mediate the close apposition of membranes to facilitate lipid transfer.

413 In the HEK293 and HeLa BioID datasets, RAB18-associations with all three NRZ  
414 components were nucleotide-binding-dependent and RAB3GAP-dependent  
415 respectively (Figures 1B, 2D, Tables S1, S2). In the HeLa dataset, the ER SNARE  
416 proteins STX18 and BNIP1 were also identified as associating with RAB18 in a  
417 RAB3GAP-dependent manner (Figure 2D, Table S2). Interestingly, also among the  
418 RAB3GAP-dependent RAB18 associations was SEC22A, a poorly studied  
419 homologue of SEC22B.

420 SEC22A is one of two SEC22B homologues in humans, the other being SEC22C.  
421 Like SEC22B, SEC22A and SEC22C possess N-terminal Longin domains and C-  
422 terminal transmembrane (TM) domains. However, they lack the central coiled-coil  
423 SNARE domain through which SEC22B mediates membrane fusion as part of the  
424 STX18 complex. SEC22B localizes to the ER–Golgi intermediate compartment,  
425 whereas different isoforms of SEC22C localize to the ER or *cis*-Golgi (Yamamoto et  
426 al., 2017, Ge et al., 2013, Zhang et al., 1999). The localization of SEC22A had not  
427 been addressed. In the absence of commercially available antibodies for SEC22A,  
428 we examined its localization through expression of an mEmerald-SEC22A fusion  
429 protein (Figure 5A). mEmerald-SEC22A produced a characteristic reticular staining  
430 pattern and colocalized with an exogenous ER marker suggesting that SEC22A  
431 localizes to the ER.

432 We next sought to compare the localization of SEC22A and RAB18 and to determine  
433 whether they interact. However, coexpression of mEmerald-SEC22A and mCherry-



434 RAB18 appeared to disrupt normal ER morphology and to produce vesicular  
435 structures and inclusions positive for both proteins (Figure S5). Although this was not  
436 inconsistent with a protein-protein interaction, it precluded the use of coexpressed  
437 exogenous proteins to test such an interaction. We therefore used a BirA\*-SEC22A  
438 fusion protein to verify the RAB18-SEC22A association, to identify other SEC22A-  
439 associations, and to determine whether these associations were influenced by the  
440 absence of RAB18 or its regulators. To minimize potential toxicity while increasing  
441 biotin-ligase activity, we used BioID2 (Kim et al., 2016) with a p.Gly40Ser active site  
442 modification (Branon et al., 2018) and reduced biotin incubation time to 6 hours. LFQ  
443 analysis following streptavidin pull-down and mass spectrometry indicated that  
444 BioID2(Gly40S)-SEC22A was present at much lower levels than the BirA\*-RAB18 in  
445 the prior experiments ( $3.79 \pm 0.96\%$ ). However, after adjusting for non-specific binding  
446 and normalizing the data according to the quantity of BioID2(Gly40S)-SEC22A in  
447 each sample, the construct appeared to label RAB18 in a RAB3GAP-dependent  
448 manner (Figure 5B). RAB3GAP1 and RAB3GAP2, as well as the putative RAB18-  
449 associated proteins REEP4 and BICD2, were among 55 SEC22A-associated  
450 proteins present in samples from wild-type cells in >2 replicate experiments and  
451 represented by >3 spectral counts (Table S5). Furthermore, also among these  
452 proteins, a subset of 9 SEC22A-associations were attenuated (association ratios  
453 <0.5) in samples from both RAB18-null and RAB3GAP-null cells. Broadly, these data  
454 were consistent with a functional SEC22A-RAB18 interaction.

455 Given the involvement of RAB18, the NRZ complex, and a STX18 complex lacking  
456 SEC22B in the regulation of LDs, we asked whether SEC22A might also be involved.  
457 Multiple studies have shown that LD morphology is altered in lipid-loaded cells in  
458 which RAB18 expression - or that of its regulators - is disrupted or silenced, with  
459 fewer and/or larger LDs are observed in these cells compared to controls (Bekbulat  
460 et al., 2018, Carpanini et al., 2014, Gerondopoulos et al., 2014, Li et al., 2017, Liegel  
461 et al., 2013, Xu et al., 2018). Similar observations have been made in ZW10-, NBAS-  
462 , STX18-, BNIP1- and USE1-null cells, whereas LD size distribution is unaltered  
463 when SEC22B expression is silenced (Xu et al., 2018). We examined the effects of  
464 silencing ZW10, NBAS and SEC22A in oleic acid-loaded induced human hepatocyte  
465 (IHH) cells (Figure 5C). ZW10 and NBAS silencing provided positive controls. ZW10  
466 silencing led to a significant reduction in LD number ( $p < 0.001$ ) compared to controls,

467 whereas NBAS silencing led to both a significant reduction in LD number and a  
468 significant increase in LD size ( $p < 0.001$  in each case). The effects of SEC22A  
469 silencing mirrored those of NBAS silencing, producing a significant reduction in LD  
470 number ( $p < 0.001$ ) and a significant increase in LD size ( $p < 0.001$ ). Together, these  
471 data implicate SEC22A in RAB18-mediated LD regulation.

472

473 RAB18 recruits the orphan lipase TMCO4 to the ER membrane in a RAB3GAP-  
474 dependent manner

475 Among the lipid modifying/mobilizing proteins identified as potential RAB18 effectors  
476 in HeLa cells, TMCO4 was identified in all three replicate experiments and its  
477 association with RAB18 was highly RAB3GAP-dependent (association ratio 0.06).  
478 TMCO4 (transmembrane and coiled-coil domains 4) is annotated as containing  
479 transmembrane and coiled-coil domains, but is orthologous to the Yeast protein Mil1/  
480 Yfl034w. Mil1 was found to be peripherally membrane-associated/soluble, and is  
481 thought to be an  $\alpha/\beta$  hydrolase and a probable lipase based on structural modelling  
482 (Whitfield et al., 2016). Consistent with this, a catalytic triad within its predicted active  
483 site was shown to be required to confer tolerance to the membrane-intercalating  
484 cationic amphipathic drug sertraline (Whitfield et al., 2016). The best template match  
485 produced for TMCO4 by the structural modelling tool Phyre2 (Kelley et al., 2015) is  
486 an acylglycerol/diacylglycerol lipase (Figure S6). To explore the localization of  
487 TMCO4, we expressed TMCO4-EGFP in HeLa cells (Figure 6). This construct  
488 showed a diffuse appearance consistent with a largely cytosolic localization. In  
489 contrast, EGFP-RAB18 partly localizes to the ER, as shown by its colocalization with  
490 an ER marker (Figure 6A).

491 To assess the potential interaction between RAB18 and TMCO4, we coexpressed  
492 mCherry-RAB18 and TMCO4-EGFP (Figure 6B). As in our previous experiments, we  
493 used Celltrace reagents to distinguish cells of wild-type and mutant genotypes and  
494 imaged these on the same dishes. In wild-type HeLa cells, we found that the  
495 coexpression of mCherry-RAB18 led to a dramatic redistribution of TMCO4-EGFP to  
496 the ER membrane suggesting that RAB18 is involved in the recruitment of TMCO4 to  
497 this compartment (Figure 6B, upper panels). This redistribution was completely  
498 absent in RAB3GAP1- and RAB3GAP2-null cells but unaffected in TRAPPC9-null

499 cells consistent with the BioID data. As a means of verifying the interaction, we  
500 carried out immunoprecipitation experiments using exogenous HA-RAB18 and  
501 TMCO4-EGFP (Figure 6C). As expected, TMCO4-EGFP copurified with HA-RAB18  
502 when expressed in wild-type or TRAPPC9-null cells, but not when expressed in  
503 RAB3GAP1-null cells. These data indicate that RAB18 and TMCO4 interact directly  
504 or indirectly as part of a protein complex in a RAB3GAP-dependent manner. Further,  
505 both the microscopy and the immunoprecipitation data support the suggestion that  
506 different GEFs can promote different RAB18-interactions.

507

### 508 RAB18 is involved in the mobilization of cholesterol

509 The lipid-related RAB3GAP-dependent RAB18-associated proteins in the HeLa  
510 BioID dataset included EBP, which is involved in cholesterol biosynthesis (Silve et  
511 al., 1996). ORP2/OSBPL2 and INPP5B are also robustly linked to cholesterol,  
512 functioning in cholesterol mobilization. ORP2 is thought to function as a lipid transfer  
513 protein that delivers cholesterol to the plasma membrane (PM) in exchange for  
514 PI(4,5)P<sub>2</sub>, whereas INPP5B is implicated in the hydrolysis of ORP2-bound PI(4,5)P<sub>2</sub>,  
515 presumably driving the exchange process (Wang et al., 2019). Two other proteins in  
516 this group, C2CD2L/TMEM24 and C2CD2, have not been linked to cholesterol, but  
517 C2CD2L is characterised as a PI transporter and found to promote PM PI(4,5)P<sub>2</sub>  
518 synthesis (Lees et al., 2017). Limited information is available about the function of  
519 *TMCO4* in mammals. However, it was identified in one study as one of a number of  
520 genes with upregulated expression in rabbit cerebral arteries under conditions of  
521 hypercholesterolemia (Ong et al., 2013). Another study suggests that TMCO4 is  
522 present on lipid rafts (Jin et al., 2012). On the basis of these combined findings, we  
523 investigated the potential role of RAB18 in cholesterol uptake and efflux.

524 We performed loading and efflux experiments to demonstrate the flux of  
525 cholesterol/cholesteryl ester (CE) based on the activity of RAB18. Chinese hamster  
526 ovary (CHO) cells were generated to stably express RAB18(WT), RAB18(Gln67Leu),  
527 or RAB18(Ser22Asn). These cells were then preincubated with lipoprotein deficient  
528 serum (LPDS) before addition of [<sup>14</sup>C]-oleate for 24 hours. [<sup>14</sup>C]-oleate was added in  
529 the presence of LPDS (Figure 7A, left panel) or 10% FBS (Figure 7A, right panel).  
530 [<sup>14</sup>C]-CE levels were measured at t=0, and efflux was assessed by measuring CE

531 levels 4 and 8 hours following the addition of high density lipoprotein (HDL) to the  
532 cells. In each case, [<sup>14</sup>C]-CE was isolated by thin layer chromatography quantified by  
533 scintillation counting. Efflux was also assessed directly by loading the cells with [<sup>3</sup>H]-  
534 cholesterol, then incubating them with apolipoprotein (apo) A-I. [<sup>3</sup>H]-cholesterol  
535 associated with apoA-I in the medium, as a percentage of total cellular radioactivity,  
536 is shown in Figure 7B.

537 In cells loaded with [<sup>14</sup>C]-oleate/LPDS, levels of CE were comparable in  
538 RAB18(Ser22Asn) and RAB18(WT) cells, whereas RAB18(Gln67Leu) cells stored  
539 significantly more (Figure 7A, left panel). In cells loaded with [<sup>14</sup>C]-oleate/FBS, levels  
540 of CE in RAB18(Ser22Asn) remained unchanged, whereas storage its storage was  
541 elevated in RAB18(WT) cells and RAB18(Gln67Leu) cells (Figure 7A, right panel).  
542 Interestingly, in both [<sup>14</sup>C]-oleate/LPDS-loaded and [<sup>14</sup>C]-oleate/FBS-loaded cells,  
543 the addition of HDL led to rapid depletion of CE in RAB18(Gln67Leu) cells, but not in  
544 RAB18(Ser22Asn) or RAB18(WT) cells (Figure 7A). Consistently, [<sup>3</sup>H]-cholesterol  
545 also underwent significantly more rapid efflux from these cells (Figure 7B).  
546 Collectively, these data indicate that 'activated' GTP-bound RAB18 strongly  
547 promotes the turnover and mobilization of CE.

548

## 549 DISCUSSION

550

551 In this study, we have complemented previous work showing that proximity  
552 biotinylation is a powerful means of identifying candidate Rab effectors (Gillingham  
553 et al., 2019). We have shown that comparisons between wild-type and nucleotide-  
554 binding deficient BirA\*-RAB18 fusions can help to distinguish putative effector  
555 proteins, recapitulating findings from conventional affinity purification. Further, we  
556 have found that comparing biotin-labelling produced by a BirA\*-Rab in wild-type and  
557 GEF-deficient cells can be particularly informative. For RAB18, we found that the  
558 disruption of different GEF complexes affected largely distinct subsets of its  
559 associations. Encouragingly, in the case of RAB3GAP-null cells, we found that  
560 marked changes in RAB18-associations were restricted to a relatively small number  
561 of proteins and that these comprised known and/or plausible interactors. By  
562 identifying these, we were able to exclude ~95% of RAB18-associations from  
563 consideration as more likely to represent 'noise' from bystander proteins.

564 The limited overlap between RAB3GAP- and TRAPPC9-dependent RAB18  
565 associations is interesting because it may indicate that different RAB18-GEFs control  
566 different aspects of RAB18 function. However, the large number of RAB18-  
567 associations affected in TRAPPC9-null cells may not all represent functional  
568 interactions. Loss of TRAPPC9 does not appear to affect RAB18 localization (Figure  
569 S2C). Nevertheless, it could affect RAB18-associations indirectly. TRAPP complexes  
570 regulate multiple Rab isoforms, and so broad disruption of membrane trafficking  
571 might alter the compliment of RAB18-proximal proteins. Nevertheless, it seems likely  
572 that genuine TRAPPII-dependent RAB18-associations are represented in our  
573 dataset.

574 For validation of our BioID screening, we focused on the subset of RAB3GAP-  
575 dependent candidate RAB18 effectors. These 25 proteins largely fell into three  
576 apparently interrelated functional groups: microtubule-interacting/membrane-  
577 remodelling proteins; proteins involved in bringing membranes into close apposition;  
578 and proteins involved in lipid modification and mobilization. It has been proposed that  
579 RAB18 functions to coordinate lipid transfer between apposed membranes, and our  
580 data are consistent with this model (Xu et al., 2018). Though not definitively

581 demonstrated in the present study, it seems likely that membrane remodelling  
582 precedes the engagement of tethers and SNAREs and the establishment of  
583 membrane-contacts. Lipid transporter/exchange proteins are required for lipid  
584 transfer to occur at these contact points, while lipid-modifying proteins may serve to  
585 generate concentration gradients necessary to promote directional flow. We have  
586 presented preliminary findings supporting functional interactions between RAB18  
587 and one protein from each group; two of these interactors, SEC22A and TMCO4,  
588 had not been reported previously.

589 In initial screening of 12 of the candidate effectors by IF, we observed that levels of  
590 SPG20 were reduced in the absence of RAB18 or TBC1D20 in two different cell  
591 types. SPG20 is a protein of enigmatic function, having been ascribed roles in  
592 regulating microtubule stability and bone morphogenic protein (BMP) signalling,  
593 chromosome segregation and cytokinesis, LD turnover and ubiquitylation of LD  
594 proteins, and in mitochondrial energy metabolism and calcium homeostasis  
595 (Eastman et al., 2009, Edwards et al., 2009, Joshi and Bakowska, 2011, Lind et al.,  
596 2011, Nahm et al., 2013, Nicholson et al., 2015, Renvoise et al., 2012, Ring et al.,  
597 2017, Tsang et al., 2009). Of particular interest in the context of RAB18 and its  
598 association with Warburg Micro syndrome, biallelic loss-of-function variants in  
599 *SPG20* cause Troyer syndrome, which has overlapping features including ID and  
600 ascending paraplegia (Baple and Crosby, 1993). One possible avenue for future  
601 research could be the potential relationship between SPG20 and the other RAB18-  
602 associated microtubule (MT)-binding proteins identified in this study. Like SPG20,  
603 CAMSAP1 is found to associate with poles of the mitotic spindle (Hueschen et al.,  
604 2017, Lind et al., 2011). CAMSAP1 is a MT minus-end binding protein whereas  
605 BICD2 is a component of a minus-end-directed dynein-dynactin motor complex  
606 (Hendershott and Vale, 2014, Hueschen et al., 2017, Urnavicius et al., 2015).  
607 REEP4 is localized to the ER, and like RAB18 is linked to the regulation of ER  
608 structure (Kumar et al., 2019, Gerondopoulos et al., 2014). However, it also  
609 contributes to the clearance of ER from metaphase chromatin (Schlitz et al., 2013).  
610 This role is dependent on its MT-binding, and therefore spindle-binding during  
611 metaphase. Thus, these four MT-binding proteins all function in the same  
612 spatiotemporally defined compartment during mitosis.

613 Among the membrane tethering and docking proteins associated with RAB18, we  
614 investigated SEC22A on the basis of its homology to SEC22B. SEC22B is a  
615 component of the canonical syntaxin 18 SNARE complex, and other components of  
616 this complex interact with RAB18 to regulate close apposition of membranes, though  
617 SEC22B itself is not necessary for this activity (Xu et al., 2018). Reciprocal proximity  
618 biotinylation with a BioID2-SEC22A fusion was consistent with a RAB3GAP-  
619 dependent RAB18-SEC22A interaction, and suggested that other SEC22A  
620 interactions are altered when RAB18 is absent or dysregulated. We also found that  
621 the silencing of SEC22A led to altered LD morphology, similar to that previously  
622 observed when expression of other RAB18-associated tethering/docking proteins  
623 was disrupted. It is tempting to speculate that SEC22A contributes to a non-  
624 fusogenic SNARE complex, since it lacks the SNARE domain usually required to  
625 provide the mechanical force for fusion. SNARE proteins can be relatively  
626 promiscuous in their interactions, and there are numerous examples of individual  
627 SNAREs contributing to distinct SNARE complexes (Wang et al., 2017, Petkovic et  
628 al., 2014). There are also examples in which SNARE complexes mediate the stable  
629 association of membranes rather than their fusion (Petkovic et al., 2014).

630 Rab proteins, SM proteins and tethering factors can contribute to compartmental  
631 specificity and the assembly of specific SNARE complexes. In Yeast, the RAB1  
632 orthologue Ypt1p and the SM protein Sly1p are implicated in the assembly of the  
633 canonical syntaxin 18 (Ufe1p) SNARE complex (Kamena et al., 2008, Yamaguchi et  
634 al., 2002, Dilcher et al., 2003, Lewis and Pelham, 1996, Lewis et al., 1997). In  
635 mammals, multiple Rab isoform(s) and the Sly1p orthologue SCFD1 may fulfil this  
636 role (Nakajima et al., 2004, Hirose et al., 2004, Galea et al., 2015, Tagaya et al.,  
637 2014). The suggestion that RAB18 regulates assembly of a distinct SNARE complex  
638 (Xu et al., 2018) is consistent both with our identification of SEC22A as a RAB18-  
639 associated protein, and also with our finding that SCFD2 but not SCFD1 associates  
640 with RAB18 in a RAB3GAP-dependent manner. SCFD2 is a poorly characterised  
641 Sly1p orthologue, but dramatic effects of SCFD1 silencing on the secretory pathway  
642 suggest that SCFD1 and SCFD2 do not function redundantly (Bassaganyas et al.,  
643 2019). Although we did not validate the RAB18-SCFD2 association directly, it has  
644 recently been reported in another study (Gillingham et al., 2019).

645 The lipid modifying/mobilizing proteins that we found associated with RAB18  
646 included the poorly characterised orphan lipase TMCO4. We have presented clear  
647 evidence for the RAB3GAP-dependent recruitment of TMCO4 to the ER by RAB18,  
648 further validating the BioID approach and dataset. We have not yet conclusively  
649 proven the link between RAB18 and the other lipid-related proteins in this group,  
650 ORP2, INPP5B, C2CD2, C2CD2L and EBP. Any conjecture based on these  
651 prospective interactions therefore remains tentative. Nevertheless, we have shown  
652 that RAB18 influences cellular cholesterol mobilization, a process in which TMCO4  
653 may be involved, and in which ORP2 and INPP5B appear to have a central role  
654 (Lees et al., 2017). ORP2 is thought to act as cholesterol-PI(4,5)P<sub>2</sub> exchanger,  
655 whereas INPP5B is thought to drive the exchange process by catalysing PI(4,5)P<sub>2</sub>  
656 hydrolysis. Therefore, these proteins are strong candidates for future investigation.  
657 Interestingly, INPP5B has been shown in several studies to have a relatively broad  
658 Rab-binding specificity (Fukuda et al., 2008, Williams et al., 2007). Further, many  
659 other phosphoinositide phosphatase enzymes, including members from distinct  
660 protein families, bind to Rab proteins (Gillingham et al., 2019). Multiple OSBP-  
661 homologues also bind to Rabs (Gillingham et al., 2019, Rocha et al., 2009, Sobajima  
662 et al., 2018), raising the possibility that phosphoinositide-unloading from OSBPs  
663 constitutes a conserved role for RAB proteins generally: different Rab isoforms may  
664 specify intermembrane transfer of different lipid species by association with different  
665 combinations of phosphatase and OSBP proteins. One interesting possibility we are  
666 currently pursuing is that RAB18 may contribute to cholesterol biosynthesis through  
667 the delivery of substrate to the EBP enzyme, or through the relocalization of the lipid  
668 species it generates.

669 To summarise, we have used complementary proximity ligation approaches together  
670 with CRISPR gene-editing to inventory RAB18-associated proteins. The RAB3GAP-  
671 dependent RAB18-associations we have highlighted are supported by additional  
672 validation of three examples, as well as by correlative information from the literature.  
673 Broadly, the latter suggests a role for Rab proteins distinct from that in mediating  
674 vesicular membrane traffic. Another role of Rabs may be to assemble a network of  
675 diverse membrane-membrane contact sites and then orchestrate highly regulated  
676 metabolism and flow of lipid species within a discontinuous lipid phase. We have  
677 shown that RAB18 influences cholesterol mobilization, and priorities for future work



678 will be to categorically define the molecular mechanism involved and to determine  
679 whether altered cholesterol flux underlies the pathology of Warburg Micro syndrome.  
680 Since several of the putative RAB18 effectors we have uncovered are also encoded  
681 by disease-associated genes, a further aim will be to determine the extent to which  
682 the molecular pathology of these conditions overlap.

683

684

685

## 686 MATERIALS AND METHODS

687

### 688 Plasmids

689 Generation of recombinant pcDNA5 FRT/TO FLAG-BirA(Arg118Gly) vectors for  
690 preparation of stable T-Rex-293 cell lines is described below. Generation of  
691 recombinant pX461 and pX462 plasmids for CRISPR gene-editing is described  
692 below. Generation of recombinant pCMV vectors for preparation of stable CHO cell  
693 lines is described below. The EGFP-RAB18 construct has been described previously  
694 (Gerondopoulos et al., 2014). The RAB18 sequence was excised from this construct  
695 using BamHI and HindIII restriction enzymes (New England Biolabs, Hitchin, UK),  
696 and used to generate constructs encoding mEmerald-RAB18 and mCherry-RAB18  
697 by ligation into mEmerald-C1 and mCherry-C1 vectors (Addgene, Watertown, MA)  
698 using HC T4 Ligase and rapid ligation buffer (Promega, Southampton, UK).  
699 Constructs encoding BirA\*-RAB18, BioID2(Gly40Ser)-SEC22A, mEmerald-SEC22A,  
700 mEmerald-SPG20 and mEmerald-RAB7A were generated following PCR  
701 amplification from template and subcloning into an intermediate pCR-Blunt II-TOPO  
702 vector using a Zero Blunt TOPO PCR Cloning Kit (ThermoFisher Scientific,  
703 Waltham, MA) according to manufacturer's instructions. Fragments were excised  
704 from intermediate vectors and then subcloned into target vectors using restriction-  
705 ligation, as above. A construct encoding mCherry-ER was obtained from Addgene,  
706 and a construct encoding TMCO4-EGFP was synthesised and cloned by GeneWiz  
707 (Leipzig, Germany). Details of PCR templates, primers and target vectors are listed  
708 in Table S6.

709

### 710 Antibodies and reagents

711 A custom polyclonal antibody to RAB18 generated by Eurogentec (Southampton,  
712 UK) has been described previously (Handley et al., 2015). An antibody to  
713 RAB3GAP1 was obtained from Bethyl Labs (Montgomery, TX), an antibody to GFP  
714 was obtained from Takara Bio (Saint-Germain-en-Laye, France), an antibody to  $\beta$ -  
715 Tubulin was obtained from Abcam (Cambridge, UK) and an antibody to  $\beta$ -Actin was  
716 obtained from ThermoFisher. Antibodies to hemagglutinin (HA), RAB3GAP2 and  
717 TBC1D20 were obtained from Merck (Gillingham, UK). Antibodies to ZW10, STX18,

718 SPG20, RINT1, REEP4, BNIP1, C2CD2, TRIM13, WFS1, INPP5B, OSBPL2 and  
719 NBAS were obtained from Proteintech (Manchester, UK). Antibody catalogue  
720 numbers and the dilutions used in this study are listed in Table S6.

721

## 722 Cell culture

723 T-REx-293, HeLa and IHH cells were maintained in DMEM media, RPE1 cells in  
724 DMEM/F12 media and CHO cells in alpha-MEM media (ThermoFisher). In each  
725 case, media was supplemented with 10% foetal calf serum (FCS) and 1% penicillin-  
726 streptomycin (PS). Cells were maintained at 37°C and 5% CO<sub>2</sub>.

727

## 728 Generation of stable T-Rex-293 and CHO cell lines

729 PCR products encoding mouse RAB18, RAB18(Gln67Leu) and RAB18(Ser22Asn)  
730 were subcloned into NotI-linearized pcDNA5 FRT/TO FLAG-BirA(Arg118Gly) vector  
731 using the In-Fusion HD EcoDry Cloning Plus kit (Takara Bio) according to  
732 manufacturer's instructions. Details of PCR templates, primers and target vectors are  
733 listed in Table S6. 1.5ug of each recombinant vector together with 13.5ug of pOG44  
734 plasmid (ThermoFisher) were used in cotransfections of T-REx-293 cells, in 10cm  
735 dishes, with TransIT-LT1 Transfection Reagent (Mirus Bio, Madison, WI). 16 hours  
736 following transfection, media was replaced and cells were allowed to recover for 24  
737 hours. Each dish was then split to 4x 10cm dishes in selection media containing 10  
738 ug/ml Blasticidin and 50 ug/ml Hygromycin B. Resistant clones were pooled and  
739 passaged once prior to use.

740 A PCR product encoding mouse RAB18 was subcloned into an intermediate TOPO  
741 vector using a TOPO PCR Cloning Kit (ThermoFisher) according to manufacturer's  
742 instructions. The RAB18 fragment was then excised and subcloned into the pCMV  
743 vector. PCR-based site-directed mutagenesis using a GeneArt kit (ThermoFisher)  
744 was then used to generate pCMV-RAB18(Gln67Leu) and pCMV-RAB18(Ser22Asn)  
745 constructs. CHO cells were transfected using Lipofectamine 2000 reagent  
746 (ThermoFisher) and cells stably-expressing each construct were selected-for with  
747 blasticidin. Under continued selection, clonal cell-lines were grown from single cells  
748 and then RAB18 protein expression was assessed. Cell lines comparably expressing

749 RAB18 constructs at levels 2.5-5x higher than those wild-type cells were used in  
750 subsequent experiments.

751

#### 752 Generation of clonal 'knockout' HeLa and RPE1 cell lines

753 CRISPR/Cas9 gene-editing was carried out essentially as described in Ran et al.,  
754 2013 (Ran et al., 2013). Guide RNA (gRNA) sequences are shown in (Table S6). A  
755 list of the clonal cell lines generated for this study, together with the loss-of-function  
756 variants they carry is shown in (Figure S1A). Western blot validation is shown in  
757 (Figure S1B-E). Briefly, for each targeted exon, pairs of gRNA sequences were  
758 selected using the online CRISPR design tool (<http://crispr.mit.edu/>). Oligonucleotide  
759 pairs incorporating these sequences (Sigma) were annealed (at 50mM ea.) in 10mM  
760 Tris pH8, 50mM NaCl and 1mM EDTA by incubation at 95°C for 10 minutes followed  
761 by cooling to room temperature. Annealed oligonucleotides were diluted and ligated  
762 into BbsI-digested pX461 and pX462 plasmids (Addgene) using HC T4 Ligase and  
763 rapid ligation buffer (Promega). Sequences of all recombinant plasmids were verified  
764 by direct sequencing. Pairs of plasmids were cotransfected into cells using  
765 Lipofectamine 2000 reagent according to manufacturer's instructions. Cells were  
766 selected for puromycin resistance (conferred by pX462) using 24 hours puromycin-  
767 treatment. Following 12 hours recovery, they were selected for GFP fluorescence  
768 (conferred by pX461) and cloned using FACS Aria2 SORP, Influx or FACSMelody  
769 instruments (BD, Wokingham, UK). After sufficient growth, clones were analysed by  
770 PCR of the targeted exons (Primers are listed in Table S6). In order to sequence  
771 individual gene edited-alleles, PCR products from each clone were first cloned into  
772 ZeroBlunt TOPO vector (ThermoFisher) and then subjected to colony PCR. These  
773 PCR products were then analysed by direct sequencing. Sequencing data was  
774 assessed using BioEdit software (<http://www.mbio.ncsu.edu/BioEdit/bioedit.html>).

775

#### 776 BirA/BioID proximity labelling (T-REx-293 cells)

777 The T-REx-293 Cell Lines (described above) were seeded onto 3x 15cm plates each  
778 and allowed to adhere. Expression of BirA\*-RAB18 fusion proteins was induced by  
779 treatment with 20ng/ml Tetracycline for 16 hours. Media was then replaced with  
780 media containing 20% FBS, 20 ng/ml Tetracycline and 50 uM Biotin and the cells

781 were incubated for a further 8 hours, washed with warmed PBS and pelleted in ice-  
782 cold PBS. Cell pellets were snap-frozen and stored at -80°C prior to lysis. Lysis was  
783 carried out in 3ml of ice-cold RIPA buffer (150 mM NaCl, 1% NP40, 0.5% Sodium  
784 Deoxycholate, 0.1% SDS, 1mM EDTA, 50mM Tris, pH 7.4) supplemented with  
785 complete-mini protease inhibitor cocktail (Roche, Basel, Switzerland), 1mM PMSF,  
786 and 62.5 U/ml Benzonase (Merck). Lysates were incubated for 1 hour at 4°C then  
787 sonicated in an ice bath (four 10 second bursts on low power). They were then  
788 clarified by centrifugation, and the supernatants transferred to tubes containing pre-  
789 washed streptavidin-sepharose (30µl bed-volume)(Merck). The beads were  
790 incubated for 3 hours at 4°C, then washed x5 in RIPA buffer and x4 in buffer  
791 containing 100mM NaCl, 0.025% SDS and 25 mM Tris, pH7.4.

792

### 793 BirA\*/BioID proximity labelling (HeLa cells)

794 Proximity-labelling in HeLa cells was carried out largely as described by Roux et al.  
795 (Roux et al., 2012), but with minor modifications. HeLa cells were grown to 80%  
796 confluence in T75 flasks and then each flask was transfected with 1-1.5µg of the  
797 BirA\*-RAB18 construct or 1µg of the BioID2(Gly40Ser)-SEC22A construct using  
798 Lipofectamine 2000 reagent in Optimem serum-free medium (ThermoFisher) for 4  
799 hours, according to manufacturer's instructions. 24 hours post-transfection, media  
800 was replaced with fresh media containing 50µM Biotin (Merck) and the cells were  
801 incubated for a further 24 or 6 hours (for BirA\*-RAB18 and BioID2(Gly40Ser)-  
802 SEC22A experiments respectively). Cells were then trypsinised and washed twice in  
803 PBS before pellets were transferred to 2ml microcentrifuge tubes and snap-frozen.  
804 For each pellet, lysis was carried out in 420µl of a buffer containing 0.2% SDS, 6%  
805 Triton-X-100, 500mM NaCl, 1mM DTT, EDTA-free protease-inhibitor solution  
806 (Expedeon, Cambridge, UK), 50mM Tris pH7.4. Lysates were sonicated for 10  
807 minutes using a Bioruptor device together with protein extraction beads (Diagenode,  
808 Denville, NJ). Each lysate was diluted with 1080µl 50mM Tris pH7.4, and they were  
809 then clarified by centrifugation at 20 000xg for 30 minutes at 4°C. Affinity purification  
810 of biotinylated proteins was carried out by incubation of clarified lysates with  
811 streptavidin-coated magnetic Dynabeads (ThermoFisher) for 24 hours at 4°C. Note  
812 that a mixture of Dynabeads - MyOne C1, MyOne T1, M270 and M280 – was used

813 to overcome a problem with bead-clumping observed when MyOne C1 beads were  
814 used alone. Successive washes were carried out at room temperature with 2% SDS,  
815 a buffer containing 1% Triton-X-100, 1mM EDTA, 500mM NaCl, 50mM HEPES  
816 pH7.5, a buffer containing 0.5% NP40, 1mM EDTA, 250mM LiCl, 10mM Tris pH7.4,  
817 50mM Tris pH7.4 and 50mM ammonium bicarbonate.

818

#### 819 Preparation of cell lysates for label-free quantitative proteomics

820 RPE1 and HeLa cells were grown to confluence in T75 flasks. They were then  
821 trypsinised, and cell pellets were washed with PBS and snap-frozen prior to use.  
822 RPE1 pellets were resuspended in 300µl 6M GnHCl, 75mM Tris, pH=8.5. HeLa  
823 pellets were resuspended in 300µl 8M urea, 75mM NaCl, 50mM Tris, pH=8.4. In  
824 each case, samples were sonicated for 10 minutes using a Bioruptor device together  
825 with protein extraction beads (Diagenode). RPE1 samples were heated for 5 minutes  
826 at 95°C. Samples were clarified by centrifugation.

827

#### 828 Mass spectrometry

829 Washed beads from BioID experiments with T-Rex-293 cell lines were resuspended  
830 in 50µl 6M urea, 2M thiourea, 10mM Tris, pH=8.5 and DTT was added to 1mM. After  
831 30 minutes incubation at 37°C, samples were alkylated with 5mM iodoacetamide  
832 (IAA) in the dark for 20minutes. DTT was increased to 5mM and 1µg lysC was  
833 added, then samples were incubated at 37°C for 6 hours. Samples were diluted to  
834 1.4M urea, then digested with trypsin (Promega), overnight at 37°C, according to  
835 manufacturer's instructions. Samples were acidified by the addition of 0.9% formic  
836 acid and 5% acetonitrile.

837 Washed beads from BioID experiments with HeLa cells were subjected to limited  
838 proteolysis by trypsin (0.3 ug) at 27°C for 6.5hours in 2mM urea, 1mM DTT, 75mM  
839 Tris, pH=8.5, then supernatants were incubated overnight at 37°C. Samples were  
840 alkylated with 50mM IAA in the dark for 20minutes, then acidified by addition of 8µl  
841 10% trifluoroacetic acid (TFA). RPE1 lysates were reduced and alkylated through  
842 addition of tris(2-carboxyethyl)phosphine (TCEP) and 2-chloroacetamide (CAA) to  
843 5mM and 10mM respectively and then incubated at 95°C for 5 minutes. After

844 cooling, samples were diluted to 3M guanidine and 0.5µg lysC added with incubation  
845 overnight at 37°C. A further dilution to 1M guanidine was followed by digest with  
846 0.3µg trypsin at 37°C for 4 hours. Samples were acidified with TFA. HeLa lysates  
847 were reduced and alkylated by addition of DTT to 10mM, then by addition of IAA to  
848 25mM, then further addition of DTT to 25mM, with incubation at room temperature  
849 for 30-60 minutes following each step. Samples were digested with lysC, overnight at  
850 37°C. They were then diluted to 2M urea, and further digested, overnight at 37°C.  
851 Samples were acidified with TFA.

852 For BioID samples from T-REx-293 cells, LC-MS was carried out as previously  
853 described (Brunet et al., 2016). Briefly, peptides in an aqueous solution containing  
854 5% acetonitrile and 0.1% formic acid were loaded onto a 3 µm PepMap100, 2 cm, 75  
855 µm diameter sample column using an Easy nLC 1000 ultrahigh pressure liquid  
856 chromatography system (ThermoFisher). They were eluted with acetonitrile/formic  
857 acid into an in-line 50 cm separating column (2 µm PepMap C18, 75 µm diameter) at  
858 40°C. Separated peptides were ionized using an Easy Spray nano source and  
859 subjected to MS/MS analysis using a Velos Orbitrap instrument (ThermoFisher).  
860 Following acquisition, data were analysed using SEAQUEST software.

861 For other samples, peptides were loaded on to activated (methanol), equilibrated  
862 (0.1% TFA) C18 stage tips before being washed with 0.1% TFA and eluted with  
863 0.1% TFA/80 acetonitrile. The organic was dried off, 0.1% TFA added to 15 µl and 5  
864 µl injected onto LC-MS. Peptides were separated on an Ultimate nano HPLC  
865 instrument (ThermoFisher), and analysed on either an Orbitrap Lumos or a Q  
866 Exactive Plus instrument (ThermoFisher). After data-dependent acquisition of HCD  
867 fragmentation spectra, data were analysed using MaxQuant and the uniprot human  
868 reference proteome. Versions, releases, parameters and gradients used for  
869 separation are provided in table S6.

870

### 871 Cell labelling

872 In order to distinguish cells of different genotypes within the same well/on the same  
873 coverslip, CellTrace Violet and CellTrace Far Red reagents (ThermoFisher) were  
874 used to label cells before they were seeded. Cells of different genotypes were first  
875 trypsinised and washed with PBS separately. They were then stained in suspension

876 by incubation with either 1 $\mu$ M CellTrace Violet or 200nM CellTrace Far Red for 20  
877 minutes at 37°C. Remaining dye was removed by addition of a ten-fold excess of full  
878 media, incubation for a further 5 minutes, and then by centrifugation and  
879 resuspension of the resulting pellets in fresh media. Differently-labelled cells were  
880 combined prior to seeding.

881

#### 882 Immunofluorescence microscopy

883 HeLa or RPE1 cells were seeded in 96-well glass-bottom plates (PerkinElmer,  
884 Waltham, MA) coated with Matrigel (Corning, Amsterdam, Netherlands) according to  
885 manufacturer's instructions, and allowed to adhere for 48 hours prior to fixation. In  
886 lipid-loading experiments, cells were treated with 200 $\mu$ M oleic acid complexed to  
887 albumin (Merck) and 1 $\mu$ g/ml BODIPY-558/568-C12 (ThermoFisher) for 15 hours  
888 prior to fixation. Cells were fixed using a solution of 3% deionised Glyoxal, 20%  
889 EtOH, 0.75% acetic acid, pH=5 (Richter et al., 2018), for 20 minutes at room  
890 temperature. They were then washed with PBS containing 0.9mM CaCl<sub>2</sub> and 0.5mM  
891 MgCl<sub>2</sub> and blocked with a sterile-filtered buffer containing 1% Milk, 2% donkey serum  
892 (Merck), 0.05% Triton-X-100 (Merck), 0.9mM CaCl<sub>2</sub> and 0.5mM MgCl<sub>2</sub> in PBS  
893 pH=7.4 for at least 1 hour prior to incubation with primary antibody. Primary  
894 antibodies were added in blocking buffer without Triton-X-100, and plates were  
895 incubated overnight at 4°C. Antibody dilutions are listed in Table S6. Following  
896 washing in PBS, cells were incubated with 1:2000 Alexa 488-conjugated secondary  
897 antibody (ThermoFisher) in blocking buffer at room temperature for 1-2 hours.  
898 Following further washing in PBS, cells were imaged using an Operetta High Content  
899 Imaging System (PerkinElmer) equipped with Harmony software. In comparative  
900 fluorescence quantitation experiments, at least 18 frames – each containing >5 wild-  
901 type and >5 mutant cells – were analysed per genotype. ImageJ software was used  
902 to produce regions of interest (ROIs) corresponding to each cell using thresholding  
903 tools and images from the 405nm and 645nm channels. Median 490nm fluorescence  
904 intensity was measured for each cell and mutant fluorescence intensity (as %wild-  
905 type) was calculated for each frame and combined for each genotype.

906

#### 907 Confocal microscopy – Live cell imaging



908 HeLa or RPE1 cells were seeded on glass-bottom dishes (World Precision  
909 Instruments, Hitchin, UK) coated with Matrigel (Corning) and allowed to adhere for  
910 24 hours prior to transfection. Transfections and cotransfections were carried out  
911 with 0.5µg of each of the indicated constructs using Lipofectamine 2000 reagent in  
912 Optimem serum-free medium for 4 hours, according to manufacturer's instructions.  
913 Media were replaced and cells were allowed to recover for at least 18 hours prior to  
914 imaging. Imaging was carried out on a Nikon A1R confocal microscope equipped  
915 with the Nikon Perfect Focus System using a 60× oil immersion objective with a 1.4  
916 numerical aperture. In immunofluorescence experiments, the pinhole was set to  
917 airy1. CellTrace Violet was excited using a 403.5nm laser, and emitted light was  
918 collected at 425–475nm. EGFP and mEmerald were excited using a 488 nm laser,  
919 and emitted light was collected at 500–550 nm. BODIPY-558/568-C12 and mCherry  
920 were excited using a 561.3 nm laser, and emitted light was collected at 570–620 nm.  
921 CellTrace Far Red was excited using a 638nm laser, and emitted light was collected  
922 at 663-738nm. In fluorescence recovery after photobleaching (FRAP) experiments,  
923 the pinhole was set to airy2 and digital zoom parameters were kept constant.  
924 Bleaching was carried out using 90% laser power.

925

## 926 Immunoprecipitation

927 HeLa cells were seeded onto 10cm dishes and allowed to adhere for 24 hours prior  
928 to transfection. Transfections and cotransfections were carried out with 0.5µg of  
929 each of the indicated constructs using Lipofectamine 2000 reagent in Optimem  
930 serum-free medium for 4 hours, according to manufacturer's instructions. 24 hours  
931 post-transfection cells were trypsinised, washed with PBS, then lysed in a buffer  
932 containing 150mM NaCl, 0.5% Triton-X-100 and EDTA-free protease-inhibitor  
933 solution (Expedeon), 10mM Tris, pH=7.4. Lysates were clarified by centrifugation,  
934 input samples taken, and the remaining supernatants then added to 4µg rabbit anti-  
935 HA antibody (Merck). After 30 minutes incubation at 4°C on a rotator, 100µl washed  
936 protein G-coupled Dynabeads (ThermoFisher) were added and samples were  
937 incubated for a further 1 hour. The Dynabeads were washed x3 with buffer  
938 containing 150mM NaCl, 0.1% Triton-X-100, 10mM Tris, pH=7.4, then combined with  
939 a reducing loading buffer and subjected to SDS–PAGE.

## 940 Lipid loading experiments

941 For LD number and diameter measurements, IHH cells were seeded onto glass  
942 coverslips. siRNA transfections were carried out using FuGene reagent (Promega)  
943 according to manufacturer's instructions. siRNAs targeting ZW10 and NBAS were  
944 obtained from IDT, Coralville, IA; siRNA targeting SEC22A was obtained from  
945 Horizon Discovery, Cambridge, UK. 48 hours following transfection, cells were  
946 treated with 200nM BSA conjugated oleate for 24 hours. Coverslips were washed,  
947 fixed with 3% paraformaldehyde and stained with 1ug/mL BODIPY and 300nM DAPI.  
948 Fluorescence images were captured on a Zeiss LSM 780 confocal microscope  
949 equipped with a 100x objective. Images were analysed using ImageJ software. Data  
950 are derived from measurements from >100 cells/condition and are representative of  
951 three independent experiments.

952 For cholesterol storage and efflux experiments with [<sup>14</sup>C]-oleate, CHO cell lines  
953 (described above) were seeded onto 12-well plates and then grown to 60-75%  
954 confluence in Alpha media supplemented with 10% LPDS. Cells were grown in the  
955 presence of 10% LPDS for at least 24 hours prior to the addition of oleate. 1 µCi/ml  
956 [<sup>14</sup>C]-oleate (Perkin Elmer) was added in the presence of 10% LPDS or 10% FBS for  
957 24 hours. Cells were then washed and incubated with 50µg/ml HDL for 0, 4 or 8  
958 hours. Cellular lipids were extracted with hexane. Lipids were then dried-down and  
959 separated by thin layer chromatography (TLC) in a hexane:diethyl ether:acetic acid  
960 (80:20:2) solvent system. TLC plates were obtained from Analtech, Newark, NJ.  
961 Bands corresponding to cholesteryl ester (CE) were scraped from the TLC plate, and  
962 radioactivity was determined by scintillation counting in a Beckman Coulter LS6500  
963 Scintillation Counter using BetaMax ES Liquid Scintillation Cocktail (ThermoFisher).  
964 Three independent experiments were carried out, each with four replicates of each  
965 condition. Data from a representative experiment are shown.

966 For cholesterol efflux experiments with [<sup>3</sup>H]-cholesterol, CHO cells were seeded onto  
967 12-well plates and then grown to 60% confluence in Alpha media supplemented with  
968 10% FBS. 5 µCi/ml [<sup>3</sup>H]-cholesterol (PerkinElmer) was added in the presence of 10%  
969 FBS. After 3x PBS washes, cells were incubated with serum-free media containing  
970 25µg/ml of human apolipoprotein A-I (ApoA-I) for 5 hours. ApoA-I was a kind gift of  
971 Dr. Paul Weers (California State University, Long Beach). Radioactivity in aliquots of

972 media were determined by scintillation counting in a Beckman Coulter LS6500  
973 Scintillation Counter using LSC Cocktail (PerkinElmer). Cell lysates were produced  
974 by addition of 0.1N NaOH for 1 hour, and their radioactivity was determined as  
975 above. Cholesterol efflux was calculated as an average (+/- SD) of the % cholesterol  
976 efflux (as a ratio of the media cpm/(media + cellular cpm) x 100%).

#### 977 Western blotting

978 Cell lysates were made with a buffer containing 150mM NaCl, 0.5% Triton-X-100  
979 and EDTA-free protease-inhibitor solution (Expedeon), 50mM Tris, pH=7.4. Cell  
980 lysates and input samples from BioID and immunoprecipitation experiments were  
981 combined 1:1 with a 2x reducing loading buffer; a reducing loading buffer containing  
982 10mM EDTA was added directly to Dynabead samples. SDS-PAGE and Western  
983 blotting were carried out according to standard methods.

984

#### 985 ACKNOWLEDGEMENTS

986 We thank the Warburg Micro syndrome children and their families. We thank  
987 Professor C. A. Johnson and Dr J. A. Poulter for a critical reading of the manuscript.

988

#### 989 COMPETING INTERESTS

990 No competing interests declared.

991

#### 992 FUNDING

993 MH is supported by the University of Leeds and by a Programme Grant from the  
994 Newlife Foundation for Disabled Children (Grant Reference Number: 17-18/23).

995

#### 996 DATA AVAILABILITY

997 The mass spectrometry proteomics data have been deposited to the  
998 ProteomeXchange Consortium via the PRIDE (Perez-Riverol et al., 2019) partner  
999 repository with the dataset identifiers PXD016631, PXD016336, PXD016326,  
1000 PXD016233 and PXD016404.

1001

1002

1003

1004

1005 REFERENCES

- 1006 Aligianis, I. A., Johnson, C. A., Gissen, P., Chen, D., Hampshire, D., Hoffmann, K.,  
1007 Maina, E. N., Morgan, N. V., Tee, L., Morton, J., Ainsworth, J. R., Horn, D.,  
1008 Rosser, E., Cole, T. R., Stolte-Dijkstra, I., Fieggen, K., Clayton-Smith, J.,  
1009 Megarbane, A., Shield, J. P., Newbury-Ecob, R., Dobyns, W. B., Graham, J.  
1010 M., Jr., Kjaer, K. W., Warburg, M., Bond, J., Trembath, R. C., Harris, L. W.,  
1011 Takai, Y., Mundlos, S., Tannahill, D., Woods, C. G. & Maher, E. R. 2005.  
1012 Mutations of the catalytic subunit of RAB3GAP cause Warburg Micro  
1013 syndrome. *Nat Genet*, 37, 221-3.
- 1014 Angebault, C., Fauconnier, J., Patergnani, S., Rieusset, J., Danese, A., Affortit, C.  
1015 A., Jagodzinska, J., Megy, C., Quiles, M., Cazevielle, C., Korchagina, J.,  
1016 Bonnet-Wersinger, D., Milea, D., Hamel, C., Pinton, P., Thiry, M.,  
1017 Lacampagne, A., Delprat, B. & Delettre, C. 2018. ER-mitochondria cross-talk  
1018 is regulated by the Ca(2+) sensor NCS1 and is impaired in Wolfram  
1019 syndrome. *Sci Signal*, 11.
- 1020 Baple, E. & Crosby, A. 1993. Troyer Syndrome. *In*: ADAM, M. P., ARDINGER, H. H.,  
1021 PAGON, R. A., WALLACE, S. E., BEAN, L. J. H., STEPHENS, K. &  
1022 AMEMIYA, A. (eds.) *GeneReviews((R))*. Seattle (WA).
- 1023 Barr, F. & Lambright, D. G. 2010. Rab GEFs and GAPs. *Curr Opin Cell Biol*, 22, 461-  
1024 70.
- 1025 Bassaganyas, L., Popa, S. J., Horlbeck, M., Puri, C., Stewart, S. E., Campelo, F.,  
1026 Ashok, A., Butnaru, C. M., Brouwers, N., Heydari, K., Ripoché, J., Weissman,  
1027 J., Rubinsztein, D. C., Schekman, R., Malhotra, V., Moreau, K. & Villeneuve,  
1028 J. 2019. New factors for protein transport identified by a genome-wide  
1029 CRISPRi screen in mammalian cells. *J Cell Biol*.
- 1030 Bekbulat, F., Schmitt, D., Feldmann, A., Huesmann, H., Eimer, S., Juretschke, T.,  
1031 Beli, P., Behl, C. & Kern, A. 2018. RAB18 impacts autophagy via lipid droplet-  
1032 derived lipid transfer and is rescued by ATG9A. *bioRxiv*, 421677.
- 1033 Bem, D., Yoshimura, S., Nunes-Bastos, R., Bond, F. C., Kurian, M. A., Rahman, F.,  
1034 Handley, M. T., Hadzhiev, Y., Masood, I., Straatman-Iwanowska, A. A.,  
1035 Cullinane, A. R., Mcneill, A., Pasha, S. S., Kirby, G. A., Foster, K., Ahmed, Z.,  
1036 Morton, J. E., Williams, D., Graham, J. M., Dobyns, W. B., Burglen, L.,  
1037 Ainsworth, J. R., Gissen, P., Muller, F., Maher, E. R., Barr, F. A. & Aligianis, I.  
1038 A. 2011. Loss-of-function mutations in RAB18 cause Warburg micro  
1039 syndrome. *Am J Hum Genet*, 88, 499-507.
- 1040 Borck, G., Wunram, H., Steiert, A., Volk, A. E., Korber, F., Roters, S., Herkenrath, P.,  
1041 Wollnik, B., Morris-Rosendahl, D. J. & Kubisch, C. 2011. A homozygous  
1042 RAB3GAP2 mutation causes Warburg Micro syndrome. *Hum Genet*, 129, 45-  
1043 50.
- 1044 Branon, T. C., Bosch, J. A., Sanchez, A. D., Udeshi, N. D., Svinkina, T., Carr, S. A.,  
1045 Feldman, J. L., Perrimon, N. & Ting, A. Y. 2018. Efficient proximity labeling in  
1046 living cells and organisms with TurboID. *Nat Biotechnol*, 36, 880-887.
- 1047 Brunet, S., Saint-Dic, D., Milev, M. P., Nilsson, T. & Sacher, M. 2016. The TRAPP  
1048 Subunit Trs130p Interacts with the GAP Gyp6p to Mediate Ypt6p Dynamics at  
1049 the Late Golgi. *Front Cell Dev Biol*, 4, 48.

- 1050 Bui, M., Gilady, S. Y., Fitzsimmons, R. E., Benson, M. D., Lynes, E. M., Gesson, K.,  
1051 Alto, N. M., Strack, S., Scott, J. D. & Simmen, T. 2010. Rab32 modulates  
1052 apoptosis onset and mitochondria-associated membrane (MAM) properties. *J*  
1053 *Biol Chem*, 285, 31590-602.
- 1054 Cai, H., Reinisch, K. & Ferro-Novick, S. 2007. Coats, tethers, Rabs, and SNAREs  
1055 work together to mediate the intracellular destination of a transport vesicle.  
1056 *Dev Cell*, 12, 671-82.
- 1057 Carney, D. S., Davies, B. A. & Horazdovsky, B. F. 2006. Vps9 domain-containing  
1058 proteins: activators of Rab5 GTPases from yeast to neurons. *Trends Cell Biol*,  
1059 16, 27-35.
- 1060 Carpanini, S. M., Mckie, L., Thomson, D., Wright, A. K., Gordon, S. L., Roche, S. L.,  
1061 Handley, M. T., Morrison, H., Brownstein, D., Wishart, T. M., Cousin, M. A.,  
1062 Gillingwater, T. H., Aligianis, I. A. & Jackson, I. J. 2014. A novel mouse model  
1063 of Warburg Micro syndrome reveals roles for RAB18 in eye development and  
1064 organisation of the neuronal cytoskeleton. *Dis Model Mech*, 7, 711-22.
- 1065 Christoforidis, S., McBride, H. M., Burgoyne, R. D. & Zerial, M. 1999. The Rab5  
1066 effector EEA1 is a core component of endosome docking. *Nature*, 397, 621-5.
- 1067 Cox, J., Hein, M. Y., Luber, C. A., Paron, I., Nagaraj, N. & Mann, M. 2014. Accurate  
1068 proteome-wide label-free quantification by delayed normalization and maximal  
1069 peptide ratio extraction, termed MaxLFQ. *Mol Cell Proteomics*, 13, 2513-26.
- 1070 Dejgaard, S. Y., Murshid, A., Erman, A., Kizilay, O., Verbich, D., Lodge, R.,  
1071 Dejgaard, K., Ly-Hartig, T. B., Pepperkok, R., Simpson, J. C. & Presley, J. F.  
1072 2008. Rab18 and Rab43 have key roles in ER-Golgi trafficking. *J Cell Sci*,  
1073 121, 2768-81.
- 1074 Dilcher, M., Veith, B., Chidambaram, S., Hartmann, E., Schmitt, H. D. & Fischer Von  
1075 Mollard, G. 2003. Use1p is a yeast SNARE protein required for retrograde  
1076 traffic to the ER. *EMBO J*, 22, 3664-74.
- 1077 Eastman, S. W., Yassaee, M. & Bieniasz, P. D. 2009. A role for ubiquitin ligases and  
1078 Spartin/SPG20 in lipid droplet turnover. *J Cell Biol*, 184, 881-94.
- 1079 Edwards, T. L., Clowes, V. E., Tsang, H. T., Connell, J. W., Sanderson, C. M., Luzio,  
1080 J. P. & Reid, E. 2009. Endogenous spartin (SPG20) is recruited to  
1081 endosomes and lipid droplets and interacts with the ubiquitin E3 ligases AIP4  
1082 and AIP5. *Biochem J*, 423, 31-9.
- 1083 Feldmann, A., Bekbulat, F., Huesmann, H., Ulbrich, S., Tatzelt, J., Behl, C. & Kern,  
1084 A. 2017. The RAB GTPase RAB18 modulates macroautophagy and  
1085 proteostasis. *Biochem Biophys Res Commun*, 486, 738-743.
- 1086 Fukuda, M., Kanno, E., Ishibashi, K. & Itoh, T. 2008. Large scale screening for novel  
1087 rab effectors reveals unexpected broad Rab binding specificity. *Mol Cell*  
1088 *Proteomics*, 7, 1031-42.
- 1089 Galea, G., Bexiga, M. G., Panarella, A., O'Neill, E. D. & Simpson, J. C. 2015. A high-  
1090 content screening microscopy approach to dissect the role of Rab proteins in  
1091 Golgi-to-ER retrograde trafficking. *J Cell Sci*, 128, 2339-49.

- 1092 Ge, L., Melville, D., Zhang, M. & Schekman, R. 2013. The ER-Golgi intermediate  
1093 compartment is a key membrane source for the LC3 lipidation step of  
1094 autophagosome biogenesis. *Elife*, 2, e00947.
- 1095 Gerondopoulos, A., Bastos, R. N., Yoshimura, S., Anderson, R., Carpanini, S.,  
1096 Aligianis, I., Handley, M. T. & Barr, F. A. 2014. Rab18 and a Rab18 GEF  
1097 complex are required for normal ER structure. *J Cell Biol*, 205, 707-20.
- 1098 Gillingham, A. K., Bertram, J., Begum, F. & Munro, S. 2019. In vivo identification of  
1099 GTPase interactors by mitochondrial relocalization and proximity biotinylation.  
1100 *Elife*, 8.
- 1101 Gillingham, A. K., Sinka, R., Torres, I. L., Lilley, K. S. & Munro, S. 2014. Toward a  
1102 comprehensive map of the effectors of rab GTPases. *Dev Cell*, 31, 358-73.
- 1103 Handley, M. & Sheridan, E. 2018. RAB18 Deficiency. In: ADAM, M. P., ARDINGER,  
1104 H. H., PAGON, R. A., WALLACE, S. E., BEAN, L. J. H., STEPHENS, K. &  
1105 AMEMIYA, A. (eds.) *GeneReviews((R))*. Seattle (WA).
- 1106 Handley, M. T., Carpanini, S. M., Mali, G. R., Sidjanin, D. J., Aligianis, I. A., Jackson,  
1107 I. J. & Fitzpatrick, D. R. 2015. Warburg Micro syndrome is caused by RAB18  
1108 deficiency or dysregulation. *Open Biol*, 5, 150047.
- 1109 Hendershott, M. C. & Vale, R. D. 2014. Regulation of microtubule minus-end  
1110 dynamics by CAMSAPs and Patronin. *Proc Natl Acad Sci U S A*, 111, 5860-5.
- 1111 Hirose, H., Arasaki, K., Dohmae, N., Takio, K., Hatsuzawa, K., Nagahama, M., Tani,  
1112 K., Yamamoto, A., Tohyama, M. & Tagaya, M. 2004. Implication of ZW10 in  
1113 membrane trafficking between the endoplasmic reticulum and Golgi. *EMBO J*,  
1114 23, 1267-78.
- 1115 Hueschen, C. L., Kenny, S. J., Xu, K. & Dumont, S. 2017. NuMA recruits dynein  
1116 activity to microtubule minus-ends at mitosis. *Elife*, 6.
- 1117 Jia, D., Zhang, J. S., Li, F., Wang, J., Deng, Z., White, M. A., Osborne, D. G.,  
1118 Phillips-Krawczak, C., Gomez, T. S., Li, H., Singla, A., Burstein, E., Billadeau,  
1119 D. D. & Rosen, M. K. 2016. Structural and mechanistic insights into regulation  
1120 of the retromer coat by TBC1d5. *Nat Commun*, 7, 13305.
- 1121 Jimenez-Orgaz, A., Kvainickas, A., Nagele, H., Denner, J., Eimer, S., Dengjel, J. &  
1122 Steinberg, F. 2018. Control of RAB7 activity and localization through the  
1123 retromer-TBC1D5 complex enables RAB7-dependent mitophagy. *EMBO J*,  
1124 37, 235-254.
- 1125 Jin, J., Sison, K., Li, C., Tian, R., Wnuk, M., Sung, H. K., Jeansson, M., Zhang, C.,  
1126 Tucholska, M., Jones, N., Kerjaschki, D., Shibuya, M., Fantus, I. G., Nagy, A.,  
1127 Gerber, H. P., Ferrara, N., Pawson, T. & Quaggin, S. E. 2012. Soluble FLT1  
1128 binds lipid microdomains in podocytes to control cell morphology and  
1129 glomerular barrier function. *Cell*, 151, 384-99.
- 1130 Johansson, M., Lehto, M., Tanhuanpaa, K., Cover, T. L. & Olkkonen, V. M. 2005.  
1131 The oxysterol-binding protein homologue ORP1L interacts with Rab7 and  
1132 alters functional properties of late endocytic compartments. *Mol Biol Cell*, 16,  
1133 5480-92.

- 1134 Joshi, D. C. & Bakowska, J. C. 2011. SPG20 protein spartin associates with  
1135 cardiolipin via its plant-related senescence domain and regulates  
1136 mitochondrial Ca<sup>2+</sup> homeostasis. *PLoS One*, 6, e19290.
- 1137 Kamena, F., Diefenbacher, M., Kilchert, C., Schwarz, H. & Spang, A. 2008. Ypt1p is  
1138 essential for retrograde Golgi-ER transport and for Golgi maintenance in *S.*  
1139 *cerevisiae*. *J Cell Sci*, 121, 1293-302.
- 1140 Kelley, L. A., Mezulis, S., Yates, C. M., Wass, M. N. & Sternberg, M. J. 2015. The  
1141 Phyre2 web portal for protein modeling, prediction and analysis. *Nat Protoc*,  
1142 10, 845-58.
- 1143 Kim, D. I., Jensen, S. C., Noble, K. A., Kc, B., Roux, K. H., Motamedchaboki, K. &  
1144 Roux, K. J. 2016. An improved smaller biotin ligase for BioID proximity  
1145 labeling. *Mol Biol Cell*, 27, 1188-96.
- 1146 Kumar, D., Golchoubian, B., Belevich, I., Jokitalo, E. & Schlaitz, A. L. 2019. REEP3  
1147 and REEP4 determine the tubular morphology of the endoplasmic reticulum  
1148 during mitosis. *Mol Biol Cell*, 30, 1377-1389.
- 1149 Lamber, E. P., Siedenburg, A. C. & Barr, F. A. 2019. Rab regulation by GEFs and  
1150 GAPs during membrane traffic. *Curr Opin Cell Biol*, 59, 34-39.
- 1151 Langemeyer, L., Perz, A., Kummel, D. & Ungermann, C. 2018. A guanine nucleotide  
1152 exchange factor (GEF) limits Rab GTPase-driven membrane fusion. *J Biol*  
1153 *Chem*, 293, 731-739.
- 1154 Lees, J. A., Messa, M., Sun, E. W., Wheeler, H., Torta, F., Wenk, M. R., De Camilli,  
1155 P. & Reinisch, K. M. 2017. Lipid transport by TMEM24 at ER-plasma  
1156 membrane contacts regulates pulsatile insulin secretion. *Science*, 355.
- 1157 Lewis, M. J. & Pelham, H. R. 1996. SNARE-mediated retrograde traffic from the  
1158 Golgi complex to the endoplasmic reticulum. *Cell*, 85, 205-15.
- 1159 Lewis, M. J., Rayner, J. C. & Pelham, H. R. 1997. A novel SNARE complex  
1160 implicated in vesicle fusion with the endoplasmic reticulum. *EMBO J*, 16,  
1161 3017-24.
- 1162 Li, C., Luo, X., Zhao, S., Siu, G. K., Liang, Y., Chan, H. C., Satoh, A. & Yu, S. S.  
1163 2017. COPI-TRAPP II activates Rab18 and regulates its lipid droplet  
1164 association. *EMBO J*, 36, 441-457.
- 1165 Li, D., Zhao, Y. G., Li, D., Zhao, H., Huang, J., Miao, G., Feng, D., Liu, P., Li, D. &  
1166 Zhang, H. 2019. The ER-Localized Protein DFCP1 Modulates ER-Lipid  
1167 Droplet Contact Formation. *Cell Rep*, 27, 343-358 e5.
- 1168 Liegel, R. P., Handley, M. T., Ronchetti, A., Brown, S., Langemeyer, L., Linford, A.,  
1169 Chang, B., Morris-Rosendahl, D. J., Carpanini, S., Posmyk, R., Harthill, V.,  
1170 Sheridan, E., Abdel-Salam, G. M., Terhal, P. A., Faravelli, F., Accorsi, P.,  
1171 Giordano, L., Pinelli, L., Hartmann, B., Ebert, A. D., Barr, F. A., Aligianis, I. A.  
1172 & Sidjanin, D. J. 2013. Loss-of-function mutations in TBC1D20 cause  
1173 cataracts and male infertility in blind sterile mice and Warburg micro  
1174 syndrome in humans. *Am J Hum Genet*, 93, 1001-14.
- 1175 Lind, G. E., Raiborg, C., Danielsen, S. A., Rognum, T. O., Thiis-Evensen, E., Hoff,  
1176 G., Nesbakken, A., Stenmark, H. & Lothe, R. A. 2011. SPG20, a novel



- 1177 biomarker for early detection of colorectal cancer, encodes a regulator of  
1178 cytokinesis. *Oncogene*, 30, 3967-78.
- 1179 Liu, X., Salokas, K., Tamene, F., Jiu, Y., Weldatsadik, R. G., Ohman, T. & Varjosalo,  
1180 M. 2018. An AP-MS- and BioID-compatible MAC-tag enables comprehensive  
1181 mapping of protein interactions and subcellular localizations. *Nat Commun*, 9,  
1182 1188.
- 1183 Martin, S., Driessen, K., Nixon, S. J., Zerial, M. & Parton, R. G. 2005. Regulated  
1184 localization of Rab18 to lipid droplets: effects of lipolytic stimulation and  
1185 inhibition of lipid droplet catabolism. *J Biol Chem*, 280, 42325-35.
- 1186 Nahm, M., Lee, M. J., Parkinson, W., Lee, M., Kim, H., Kim, Y. J., Kim, S., Cho, Y.  
1187 S., Min, B. M., Bae, Y. C., Broadie, K. & Lee, S. 2013. Spartin regulates  
1188 synaptic growth and neuronal survival by inhibiting BMP-mediated  
1189 microtubule stabilization. *Neuron*, 77, 680-95.
- 1190 Nakajima, K., Hirose, H., Taniguchi, M., Kurashina, H., Arasaki, K., Nagahama, M.,  
1191 Tani, K., Yamamoto, A. & Tagaya, M. 2004. Involvement of BNIP1 in  
1192 apoptosis and endoplasmic reticulum membrane fusion. *EMBO J*, 23, 3216-  
1193 26.
- 1194 Nakamura, H., Yamashita, N., Kimura, A., Kimura, Y., Hirano, H., Makihara, H.,  
1195 Kawamoto, Y., Jitsuki-Takahashi, A., Yonezaki, K., Takase, K., Miyazaki, T.,  
1196 Nakamura, F., Tanaka, F. & Goshima, Y. 2016. Comprehensive behavioral  
1197 study and proteomic analyses of CRMP2-deficient mice. *Genes Cells*, 21,  
1198 1059-1079.
- 1199 Nicholson, J. M., Macedo, J. C., Mattingly, A. J., Wangsa, D., Camps, J., Lima, V.,  
1200 Gomes, A. M., Doria, S., Ried, T., Logarinho, E. & Cimini, D. 2015.  
1201 Chromosome mis-segregation and cytokinesis failure in trisomic human cells.  
1202 *Elife*, 4.
- 1203 Ong, W. Y., Ng, M. P., Loke, S. Y., Jin, S., Wu, Y. J., Tanaka, K. & Wong, P. T.  
1204 2013. Comprehensive gene expression profiling reveals synergistic functional  
1205 networks in cerebral vessels after hypertension or hypercholesterolemia.  
1206 *PLoS One*, 8, e68335.
- 1207 Ozeki, S., Cheng, J., Tauchi-Sato, K., Hatano, N., Taniguchi, H. & Fujimoto, T. 2005.  
1208 Rab18 localizes to lipid droplets and induces their close apposition to the  
1209 endoplasmic reticulum-derived membrane. *J Cell Sci*, 118, 2601-11.
- 1210 Perez-Riverol, Y., Csordas, A., Bai, J., Bernal-Llinares, M., Hewapathirana, S.,  
1211 Kundu, D. J., Inuganti, A., Griss, J., Mayer, G., Eisenacher, M., Perez, E.,  
1212 Uszkoreit, J., Pfeuffer, J., Sachsenberg, T., Yilmaz, S., Tiwary, S., Cox, J.,  
1213 Audain, E., Walzer, M., Jarnuczak, A. F., Ternent, T., Brazma, A. & Vizcaino,  
1214 J. A. 2019. The PRIDE database and related tools and resources in 2019:  
1215 improving support for quantification data. *Nucleic Acids Res*, 47, D442-D450.
- 1216 Petkovic, M., Jemaiel, A., Daste, F., Specht, C. G., Izeddin, I., Vorkel, D., Verbavatz,  
1217 J. M., Darzacq, X., Triller, A., Pfenninger, K. H., Tareste, D., Jackson, C. L. &  
1218 Galli, T. 2014. The SNARE Sec22b has a non-fusogenic function in plasma  
1219 membrane expansion. *Nat Cell Biol*, 16, 434-44.
- 1220 Pulido, M. R., Diaz-Ruiz, A., Jimenez-Gomez, Y., Garcia-Navarro, S., Gracia-  
1221 Navarro, F., Tinahones, F., Lopez-Miranda, J., Fruhbeck, G., Vazquez-

- 1222 Martinez, R. & Malagon, M. M. 2011. Rab18 dynamics in adipocytes in  
1223 relation to lipogenesis, lipolysis and obesity. *PLoS One*, 6, e22931.
- 1224 Raiborg, C., Wenzel, E. M., Pedersen, N. M., Olsvik, H., Schink, K. O., Schultz, S.  
1225 W., Vietri, M., Nisi, V., Bucci, C., Brech, A., Johansen, T. & Stenmark, H.  
1226 2015. Repeated ER-endosome contacts promote endosome translocation and  
1227 neurite outgrowth. *Nature*, 520, 234-8.
- 1228 Ran, F. A., Hsu, P. D., Wright, J., Agarwala, V., Scott, D. A. & Zhang, F. 2013.  
1229 Genome engineering using the CRISPR-Cas9 system. *Nat Protoc*, 8, 2281-  
1230 2308.
- 1231 Renvoise, B., Stadler, J., Singh, R., Bakowska, J. C. & Blackstone, C. 2012. Spg20-  
1232 /- mice reveal multimodal functions for Troyer syndrome protein spartin in lipid  
1233 droplet maintenance, cytokinesis and BMP signaling. *Hum Mol Genet*, 21,  
1234 3604-18.
- 1235 Richter, K. N., Revelo, N. H., Seitz, K. J., Helm, M. S., Sarkar, D., Saleeb, R. S.,  
1236 D'este, E., Eberle, J., Wagner, E., Vogl, C., Lazaro, D. F., Richter, F., Coy-  
1237 Vergara, J., Coceano, G., Boyden, E. S., Duncan, R. R., Hell, S. W.,  
1238 Lauterbach, M. A., Lehnart, S. E., Moser, T., Outeiro, T. F., Rehling, P.,  
1239 Schwappach, B., Testa, I., Zapiec, B. & Rizzoli, S. O. 2018. Glyoxal as an  
1240 alternative fixative to formaldehyde in immunostaining and super-resolution  
1241 microscopy. *EMBO J*, 37, 139-159.
- 1242 Ring, J., Rockenfeller, P., Abraham, C., Tadic, J., Poglitsch, M., Schimmel, K.,  
1243 Westermayer, J., Schauer, S., Achleitner, B., Schimpel, C., Moitzi, B.,  
1244 Rechberger, G. N., Sigrist, S. J., Carmona-Gutierrez, D., Kroemer, G.,  
1245 Buttner, S., Eisenberg, T. & Madeo, F. 2017. Mitochondrial energy  
1246 metabolism is required for lifespan extension by the spastic paraplegia-  
1247 associated protein spartin. *Microb Cell*, 4, 411-422.
- 1248 Rocha, N., Kuijl, C., Van Der Kant, R., Janssen, L., Houben, D., Janssen, H., Zwart,  
1249 W. & Neefjes, J. 2009. Cholesterol sensor ORP1L contacts the ER protein  
1250 VAP to control Rab7-RILP-p150 Glued and late endosome positioning. *J Cell*  
1251 *Biol*, 185, 1209-25.
- 1252 Roux, K. J., Kim, D. I., Burke, B. & May, D. G. 2018. BioID: A Screen for Protein-  
1253 Protein Interactions. *Curr Protoc Protein Sci*, 91, 19 23 1-19 23 15.
- 1254 Roux, K. J., Kim, D. I., Raida, M. & Burke, B. 2012. A promiscuous biotin ligase  
1255 fusion protein identifies proximal and interacting proteins in mammalian cells.  
1256 *J Cell Biol*, 196, 801-10.
- 1257 Schlaitz, A. L., Thompson, J., Wong, C. C., Yates, J. R., 3rd & Heald, R. 2013.  
1258 REEP3/4 ensure endoplasmic reticulum clearance from metaphase chromatin  
1259 and proper nuclear envelope architecture. *Dev Cell*, 26, 315-23.
- 1260 Seaman, M. N., Harbour, M. E., Tattersall, D., Read, E. & Bright, N. 2009.  
1261 Membrane recruitment of the cargo-selective retromer subcomplex is  
1262 catalysed by the small GTPase Rab7 and inhibited by the Rab-GAP TBC1D5.  
1263 *J Cell Sci*, 122, 2371-82.
- 1264 Sidjanin, D. J., Park, A. K., Ronchetti, A., Martins, J. & Jackson, W. T. 2016.  
1265 TBC1D20 mediates autophagy as a key regulator of autophagosome  
1266 maturation. *Autophagy*, 1-17.

- 1267 Silve, S., Dupuy, P. H., Labit-Lebouteiller, C., Kaghad, M., Chalon, P., Rahier, A.,  
1268 Taton, M., Lupker, J., Shire, D. & Loison, G. 1996. Emopamil-binding protein,  
1269 a mammalian protein that binds a series of structurally diverse  
1270 neuroprotective agents, exhibits delta8-delta7 sterol isomerase activity in  
1271 yeast. *J Biol Chem*, 271, 22434-40.
- 1272 Sobajima, T., Yoshimura, S. I., Maeda, T., Miyata, H., Miyoshi, E. & Harada, A.  
1273 2018. The Rab11-binding protein RELCH/KIAA1468 controls intracellular  
1274 cholesterol distribution. *J Cell Biol*, 217, 1777-1796.
- 1275 Spang, A. 2012. The DSL1 complex: the smallest but not the least CATCHR. *Traffic*,  
1276 13, 908-13.
- 1277 Spang, N., Feldmann, A., Huesmann, H., Bekbulat, F., Schmitt, V., Hiebel, C.,  
1278 Koziollek-Drechsler, I., Clement, A. M., Moosmann, B., Jung, J., Behrends,  
1279 C., Dikic, I., Kern, A. & Behl, C. 2014. RAB3GAP1 and RAB3GAP2 modulate  
1280 basal and rapamycin-induced autophagy. *Autophagy*, 10, 2297-309.
- 1281 Tagaya, M., Arasaki, K., Inoue, H. & Kimura, H. 2014. Moonlighting functions of the  
1282 NRZ (mammalian Dsl1) complex. *Front Cell Dev Biol*, 2, 25.
- 1283 Tinti, M., Johnson, C., Toth, R., Ferrier, D. E. & Mackintosh, C. 2012. Evolution of  
1284 signal multiplexing by 14-3-3-binding 2R-ohnologue protein families in the  
1285 vertebrates. *Open Biol*, 2, 120103.
- 1286 Tsang, H. T., Edwards, T. L., Wang, X., Connell, J. W., Davies, R. J., Durrington, H.  
1287 J., O'kane, C. J., Luzio, J. P. & Reid, E. 2009. The hereditary spastic  
1288 paraplegia proteins NIPA1, spastin and spartin are inhibitors of mammalian  
1289 BMP signalling. *Hum Mol Genet*, 18, 3805-21.
- 1290 Urnavicius, L., Zhang, K., Diamant, A. G., Motz, C., Schlager, M. A., Yu, M., Patel, N.  
1291 A., Robinson, C. V. & Carter, A. P. 2015. The structure of the dynactin  
1292 complex and its interaction with dynein. *Science*, 347, 1441-1446.
- 1293 Vazquez-Martinez, R., Cruz-Garcia, D., Duran-Prado, M., Peinado, J. R., Castano, J.  
1294 P. & Malagon, M. M. 2007. Rab18 inhibits secretory activity in neuroendocrine  
1295 cells by interacting with secretory granules. *Traffic*, 8, 867-82.
- 1296 Wang, H., Ma, Q., Qi, Y., Dong, J., Du, X., Rae, J., Wang, J., Wu, W. F., Brown, A.  
1297 J., Parton, R. G., Wu, J. W. & Yang, H. 2019. ORP2 Delivers Cholesterol to  
1298 the Plasma Membrane in Exchange for Phosphatidylinositol 4, 5-  
1299 Bisphosphate (PI(4,5)P2). *Mol Cell*, 73, 458-473 e7.
- 1300 Wang, T., Li, L. & Hong, W. 2017. SNARE proteins in membrane trafficking. *Traffic*,  
1301 18, 767-775.
- 1302 Whitfield, S. T., Burston, H. E., Bean, B. D., Raghuram, N., Maldonado-Baez, L.,  
1303 Davey, M., Wendland, B. & Conibear, E. 2016. The alternate AP-1 adaptor  
1304 subunit Apm2 interacts with the Mil1 regulatory protein and confers differential  
1305 cargo sorting. *Mol Biol Cell*, 27, 588-98.
- 1306 Wickner, W. 2010. Membrane fusion: five lipids, four SNAREs, three chaperones,  
1307 two nucleotides, and a Rab, all dancing in a ring on yeast vacuoles. *Annu Rev*  
1308 *Cell Dev Biol*, 26, 115-36.

- 1309 Williams, C., Choudhury, R., Mckenzie, E. & Lowe, M. 2007. Targeting of the type II  
1310 inositol polyphosphate 5-phosphatase INPP5B to the early secretory pathway.  
1311 *J Cell Sci*, 120, 3941-51.
- 1312 Wu, H., Carvalho, P. & Voeltz, G. K. 2018. Here, there, and everywhere: The  
1313 importance of ER membrane contact sites. *Science*, 361.
- 1314 Xu, D., Li, Y., Wu, L., Li, Y., Zhao, D., Yu, J., Huang, T., Ferguson, C., Parton, R. G.,  
1315 Yang, H. & Li, P. 2018. Rab18 promotes lipid droplet (LD) growth by tethering  
1316 the ER to LDs through SNARE and NRZ interactions. *J Cell Biol*, 217, 975-  
1317 995.
- 1318 Yamaguchi, T., Dulubova, I., Min, S. W., Chen, X., Rizo, J. & Sudhof, T. C. 2002.  
1319 Sly1 binds to Golgi and ER syntaxins via a conserved N-terminal peptide  
1320 motif. *Dev Cell*, 2, 295-305.
- 1321 Yamamoto, Y., Yurugi, C. & Sakisaka, T. 2017. The number of the C-terminal  
1322 transmembrane domains has the potency to specify subcellular localization of  
1323 Sec22c. *Biochem Biophys Res Commun*, 487, 388-395.
- 1324 Zhang, T., Wong, S. H., Tang, B. L., Xu, Y. & Hong, W. 1999. Morphological and  
1325 functional association of Sec22b/ERS-24 with the pre-Golgi intermediate  
1326 compartment. *Mol Biol Cell*, 10, 435-53.
- 1327 Zhao, L. & Imperiale, M. J. 2017. Identification of Rab18 as an Essential Host Factor  
1328 for BK Polyomavirus Infection Using a Whole-Genome RNA Interference  
1329 Screen. *mSphere*, 2.
- 1330 Zhen, Y. & Stenmark, H. 2015. Cellular functions of Rab GTPases at a glance. *J Cell*  
1331 *Sci*, 128, 3171-6.
- 1332
- 1333

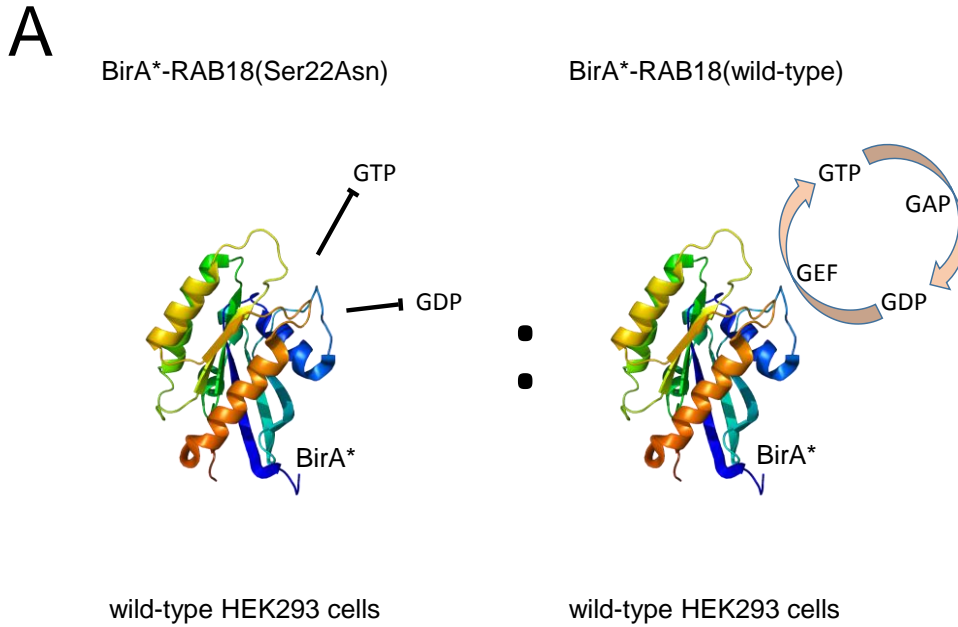

**B**

| Protein  | Ratio | Orthologue PPI<br>(Gillingham et al.,<br>2014) | Additional evidence                      |                                                                 |
|----------|-------|------------------------------------------------|------------------------------------------|-----------------------------------------------------------------|
| SCFD2    | 0.00  | Slh                                            | Gillingham et al., 2019                  | <b>RAB3GAP-<br/>dependent<br/>association in HeLa<br/>cells</b> |
| ZW10     | 0.00  | mit(1)15                                       | Xu et al., 2018; Gillingham et al., 2019 |                                                                 |
| NBAS     | 0.00  | rod                                            | Xu et al., 2018; Gillingham et al., 2019 |                                                                 |
| CAMSAP1  | 0.04  |                                                |                                          |                                                                 |
| FAM134B  | 0.36  |                                                |                                          |                                                                 |
| RINT1    | 0.41  | CG8605                                         | Xu et al., 2018                          |                                                                 |
| RAB3GAP2 | 1.58  | rab3-GAP                                       | Gerondopoulos et al., 2014               |                                                                 |
| RAB3GAP1 | 1.59  | CG31935                                        | Gerondopoulos et al., 2014               |                                                                 |
| TBC1D5   | 0.00  | CG8449                                         | Gillingham et al., 2019                  | <b>TRAPP1I-dependent<br/>association in HeLa<br/>cells</b>      |
| c15orf38 | 0.00  |                                                |                                          |                                                                 |
| SEC23IP  | 0.00  |                                                |                                          |                                                                 |
| ATP6AP2  | 0.29  |                                                |                                          |                                                                 |
| GORASP2  | 0.36  |                                                |                                          |                                                                 |
| GIGYF2   | 0.41  |                                                |                                          |                                                                 |
| TPR      | 0.41  |                                                |                                          |                                                                 |
| USP15    | 0.00  |                                                |                                          | <b>Present in HeLa<br/>dataset (n≥2)</b>                        |
| TMPO     | 0.00  |                                                |                                          |                                                                 |
| ARFGAP3  | 0.20  |                                                |                                          |                                                                 |
| ARFGAP2  | 0.31  |                                                |                                          |                                                                 |
| SLK      | 0.34  |                                                |                                          |                                                                 |
| NUP153   | 0.39  |                                                |                                          |                                                                 |
| ATG2B    | 0.43  |                                                |                                          |                                                                 |
| SCFD1    | 0.45  | Slh                                            | Gillingham et al., 2019                  |                                                                 |
| USE1     | 0.45  |                                                | Xu et al., 2018                          |                                                                 |
| TMX1     | 0.45  |                                                |                                          |                                                                 |
| CORO1B   | 0.47  |                                                |                                          |                                                                 |
| PREB     | 0.47  |                                                |                                          |                                                                 |
| SLC25A4  | 0.00  |                                                |                                          |                                                                 |
| LUZP1    | 0.00  |                                                |                                          |                                                                 |
| DPYSL2   | 0.34  |                                                | Nakamura et al., 2016                    |                                                                 |

1335 **Figure 1. Nucleotide-binding-dependent RAB18-associations in HEK293 cells.**

1336 (A) Schematic to show BirA\*-RAB18(Ser22Asn):BirA\*-RAB18(WT) comparison.

1337 RAB18 crystal structure from RCSB PDB code 1X3S. (B) Table to show putative

1338 nucleotide-binding-dependent RAB18-associations with BirA\*-

1339 RAB18(Ser22Asn):BirA\*-RAB18(WT) association ratios <0.5. Proteins orthologous

1340 to interactors identified by Gillingham et al. (2014) are indicated. Previous studies

1341 providing supporting evidence for interactions are indicated. Proteins are grouped

1342 according to their attributes in the HeLa cell dataset (Figure 2 and Table S2).

1343 Association ratios were derived individually following normalization by total spectral

1344 counts per condition. The full dataset is provided in table S1.

1345

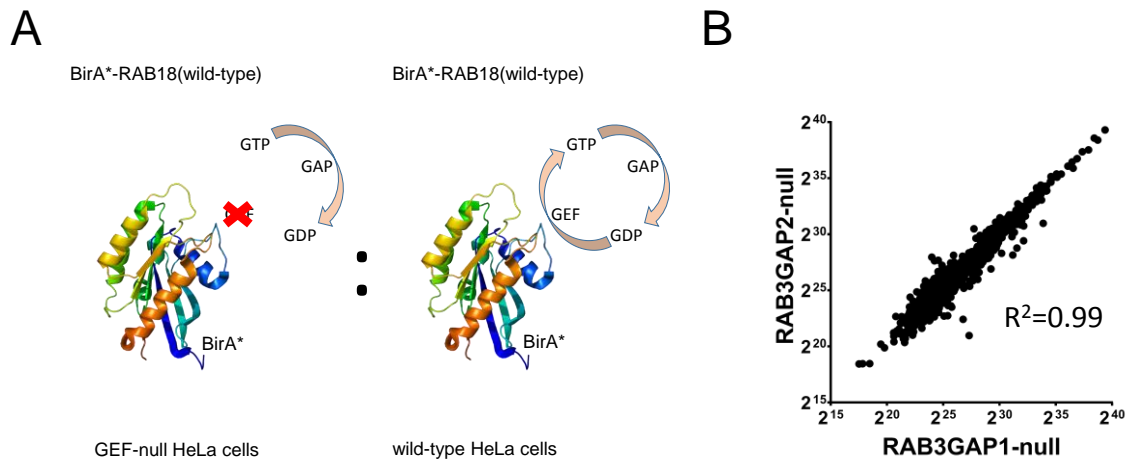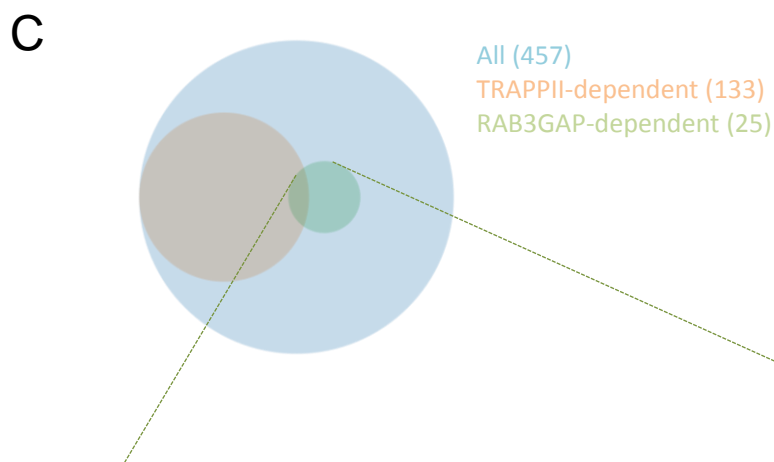

**D**

| Protein       | n        | Ratio       | Orthologue PPI<br>(Gillingham et al.,<br>2014) | Additional evidence                      |                                             |
|---------------|----------|-------------|------------------------------------------------|------------------------------------------|---------------------------------------------|
| CAMSAP1       | 3        | 0.26        |                                                |                                          | Microtubule-associated/Membrane remodelling |
| REEP4         | 3        | 0.35        |                                                | Tinti et al., 2012*                      |                                             |
| BICD2         | 2        | 0.25        | BicD                                           | Gillingham et al., 2019                  |                                             |
| <b>SPG20</b>  | <b>2</b> | <b>0.42</b> | <b>CG12001</b>                                 | <b>This study (Figure 4)</b>             |                                             |
| FAM134B       | 2        | 0.46        |                                                |                                          |                                             |
| ZW10          | 3        | 0.02        | mit(1)15                                       | Xu et al., 2018; Gillingham et al., 2019 | Membrane tethering/docking                  |
| RINT1         | 3        | 0.16        | CG8605                                         | Xu et al., 2018                          |                                             |
| NBAS          | 3        | 0.17        | rod                                            | Xu et al., 2018; Gillingham et al., 2019 |                                             |
| SCFD2         | 3        | 0.41        | Slh                                            | Gillingham et al., 2019                  |                                             |
| <b>SEC22A</b> | <b>3</b> | <b>0.46</b> |                                                | <b>This study (Figure 5)</b>             |                                             |
| WFS1          | 2        | 0.00        |                                                |                                          |                                             |
| BNIP1         | 2        | 0.36        |                                                | Xu et al., 2018                          |                                             |
| STX18         | 2        | 0.40        | Syx18                                          | Xu et al., 2018                          |                                             |
| <b>TMCO4</b>  | <b>3</b> | <b>0.06</b> |                                                | <b>This study (Figure 6)</b>             | Lipid modifying/mobilising                  |
| OSBPL2        | 3        | 0.35        |                                                |                                          |                                             |
| EBP           | 3        | 0.38        |                                                |                                          |                                             |
| INPP5B        | 2        | 0.00        |                                                |                                          |                                             |
| C2CD2L        | 2        | 0.22        |                                                |                                          |                                             |
| C2CD2         | 2        | 0.36        |                                                |                                          |                                             |
| RAB3GAP2      | 3        | 0.00        | rab3-GAP                                       | Gerondopoulos et al., 2014               | Other                                       |
| RAB3GAP1      | 3        | 0.01        | CG31935                                        | Gerondopoulos et al., 2014               |                                             |
| SSR3          | 3        | 0.49        |                                                |                                          |                                             |
| MFHAS1        | 2        | 0.00        | lrrk                                           |                                          |                                             |
| TRIM13        | 2        | 0.29        |                                                |                                          |                                             |
| SCARA3        | 2        | 0.42        |                                                |                                          |                                             |

1347 **Figure 2. RAB3GAP-dependent RAB18-associations in HeLa cells.** (A)  
1348 Schematic to show comparison of BirA\*-RAB18(WT) in wild-type and guanine  
1349 nucleotide exchange factor (GEF)-null cells. RAB18 crystal structure from RCSB  
1350 PDB code 1X3S. (B) Plot to show correlation between non-zero LFQ intensities of  
1351 individual proteins identified in samples purified from RAB3GAP1- and RAB3GAP2-  
1352 null cells. (C) Venn diagram illustrating all RAB18-associations, TRAPP1I-dependent  
1353 interactions (TRAPPC9-null:wild-type association ratios <0.5) and RAB3GAP-  
1354 dependent associations (RAB3GAP1/2-null:wild-type association ratios <0.5). (D)  
1355 Table to show putative RAB18-associations with RAB3GAP1/2-null:wild-type  
1356 association ratios <0.5. Proteins orthologous to interactors identified by Gillingham et  
1357 al. (2014) are indicated. Previous studies providing supporting evidence for  
1358 interactions are indicated. Proteins are grouped according to their reported functions.  
1359 Association ratios were derived individually following normalization by RAB18 LFQ  
1360 intensity in each replicate experiment. The full dataset is provided in table S2.  
1361



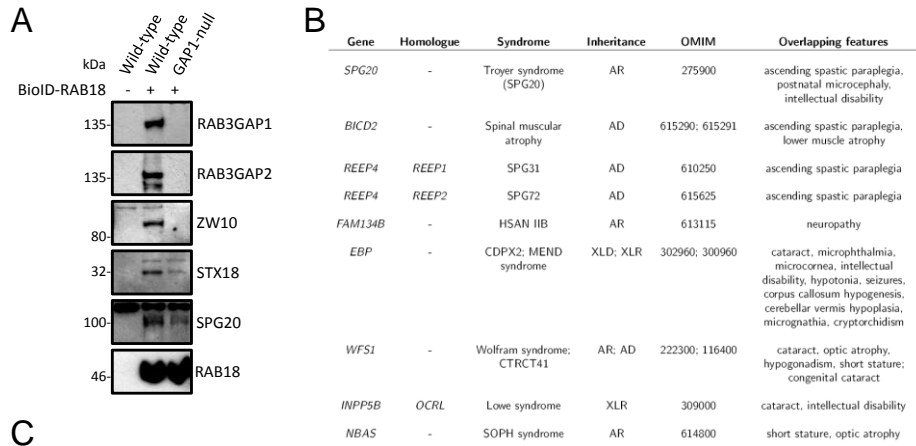

1363 **Figure 3. Initial validation of RAB3GAP-dependent RAB18-associations in**  
1364 **HeLa cells.** (A) Western blotting of samples purified from wild-type and RAB3GAP1-  
1365 null cells in an independent BioID experiment. Levels of selected proteins are  
1366 consistent with association ratios in Figure 1C. (B) Table to show diseases with  
1367 features overlapping those of Warburg Micro syndrome linked to genes encoding  
1368 putative effector proteins or their homologues. (C) Comparative fluorescence  
1369 microscopy of selected RAB18-associated proteins in wild-type and RAB18-null  
1370 HeLa cells. Cells of different genotypes were labelled with CellTrace-Violet and  
1371 CellTrace-Far Red reagents, corresponding to blue and magenta channels  
1372 respectively. Cells were stained with antibodies against indicated proteins in green  
1373 channel panels. (D) Comparative fluorescence microscopy of selected RAB18-  
1374 associated proteins in lipid-loaded wild-type and RAB18-null HeLa cells. Cells were  
1375 stained as above but were treated for 15 hours with 200 $\mu$ M oleic acid, 1 $\mu$ g/ml  
1376 BODIPY-558/568-C12 (Red channel) prior to fixation.  
1377

A

HeLa cells

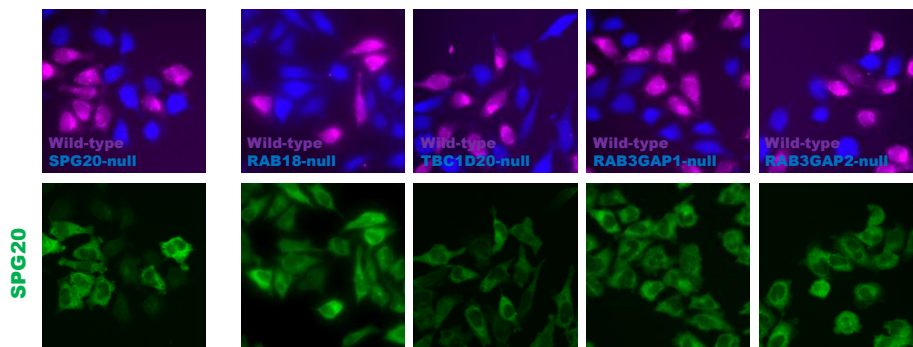

B

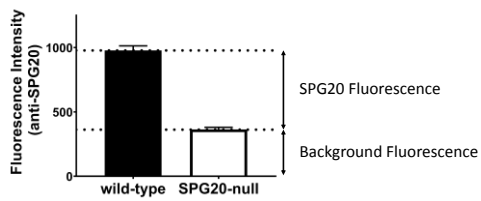

C

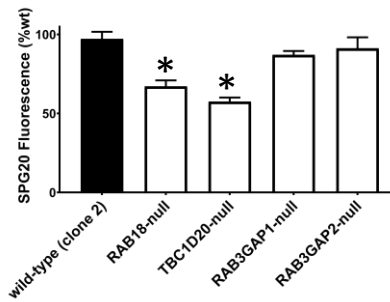

D

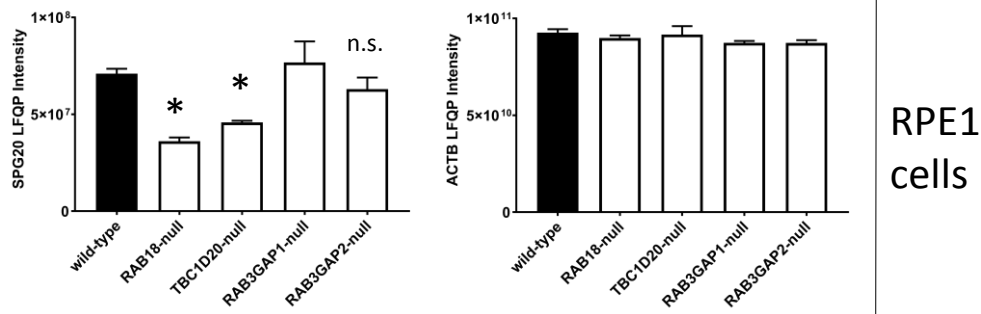

E

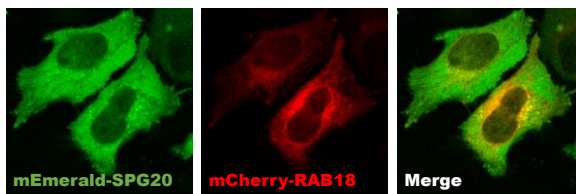

F

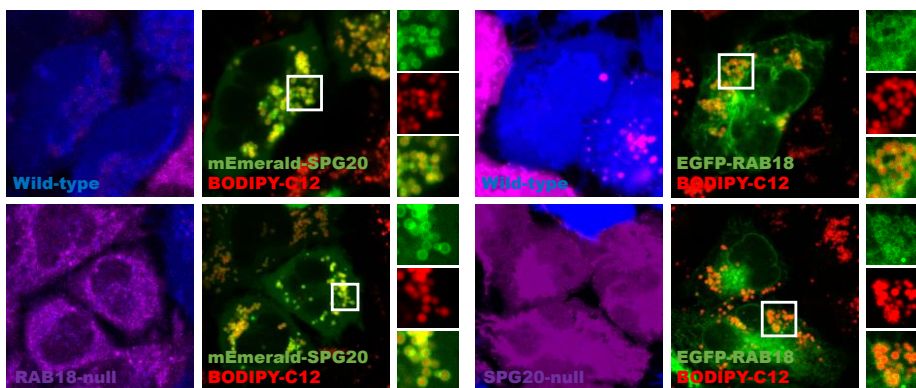

1379 **Figure 4. Levels of SPG20 are significantly reduced in RAB18-null and**  
1380 **TBC1D20-null HeLa and RPE1 cells.** (A) Comparative fluorescence microscopy of  
1381 SPG20 in wild-type and mutant HeLa cell lines. Wild-type and mutant cells of the  
1382 indicated genotypes were labelled with CellTrace-Far Red and CellTrace-Violet and  
1383 reagents respectively (magenta and blue channels). Cells were stained with an  
1384 antibody against SPG20 (green channel) (B) Quantification of SPG20 fluorescence  
1385 in wild-type cells by direct comparison with SPG20-null cells. (C) Quantification of  
1386 SPG20 fluorescence (%wt) in cells of different genotypes. Data were derived from  
1387 analysis of at least 18 frames – each containing >5 wild-type and >5 mutant cells –  
1388 per genotype. \* $p < 0.001$ . (D) LFQ intensities for SPG20 (Q8N0X7) and  $\beta$ -Actin  
1389 (P60709) in whole-cell lysates of RPE1 cells of the indicated genotypes.  $n=3$ ;  
1390 \* $p < 0.05$  following FDR correction. Full dataset provided in table S3. Error bars  
1391 represent s.e.m. (E) Confocal micrograph to show localization of exogenous  
1392 mEmerald-SPG20 (Green) and mCherry-RAB18 (Red) in HeLa cells. (F) Confocal  
1393 micrographs to show localization of exogenous mEmerald-SPG20 (Green; left  
1394 panels) and EGFP-RAB18 (Green; right panels) in HeLa cells loaded with 200 $\mu$ M  
1395 oleic acid, 1 $\mu$ g/ml BODIPY-558/568-C12 (Red channel). Wild-type and mutant cells  
1396 of the indicated genotypes were labelled with CellTrace-Violet and CellTrace-Far  
1397 Red reagents respectively (magenta and blue channels).  
1398

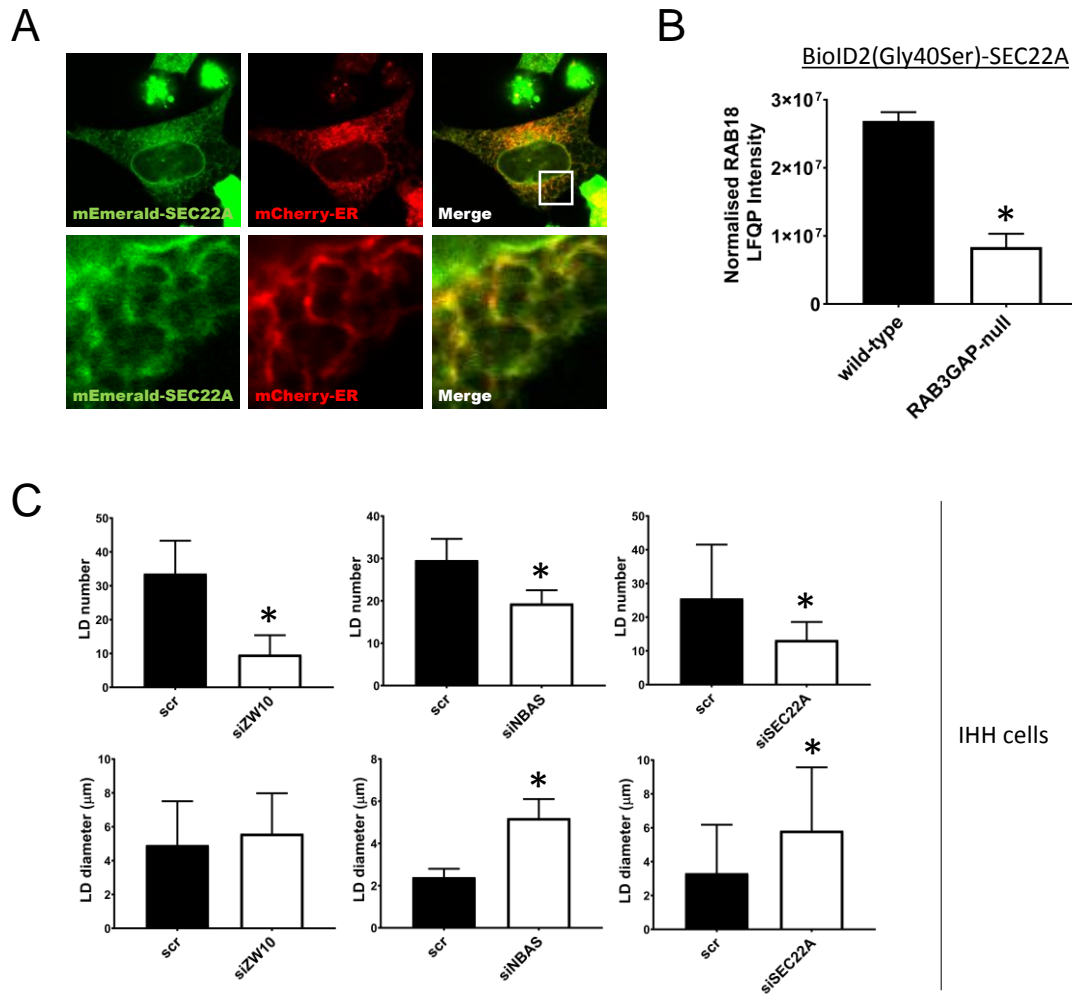

1399

1400 **Figure 5. SEC22A associates with RAB18 and influences LD morphology.** (A)  
1401 Confocal micrograph to show overlapping localization of exogenous mEmerald-  
1402 SEC22A (Green) and mCherry-ER (Red) in HeLa cells. (B) RAB18 LFQ intensities  
1403 from a reciprocal BioID experiment showing a reduced association between  
1404 BioID2(Gly40Ser)-SEC22A and endogenous RAB18 in RAB3GAP-null compared to  
1405 wild-type HeLa cells. Data were adjusted to account for non-specific binding of  
1406 RAB18 to beads and normalized by SEC22A LFQ intensities in each replicate  
1407 experiment. Error bars represent s.e.m. Data for other BioID2(Gly40Ser)-SEC22A-  
1408 associated proteins are provided in table S5. (C) Bar graphs to show effects of  
1409 ZW10, NBAS and SEC22A knockdowns on lipid droplet number and diameter.  
1410 siRNA-treated IHH cells were loaded with 200nM BSA-conjugated oleate, fixed and  
1411 stained with BODIPY and DAPI, and imaged. Images were analysed using ImageJ.  
1412 Data are derived from measurements from >100 cells/condition and are  
1413 representative of three independent experiments. Error bars represent SD. \*p<0.001

A

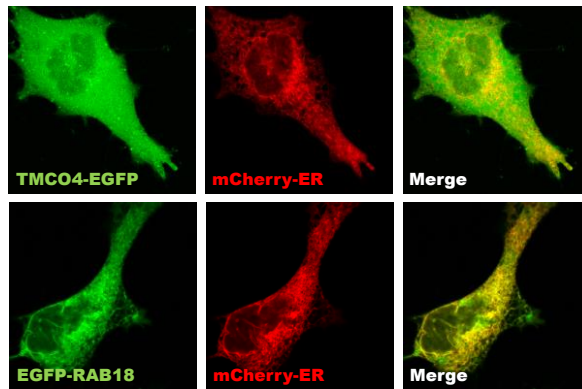

B

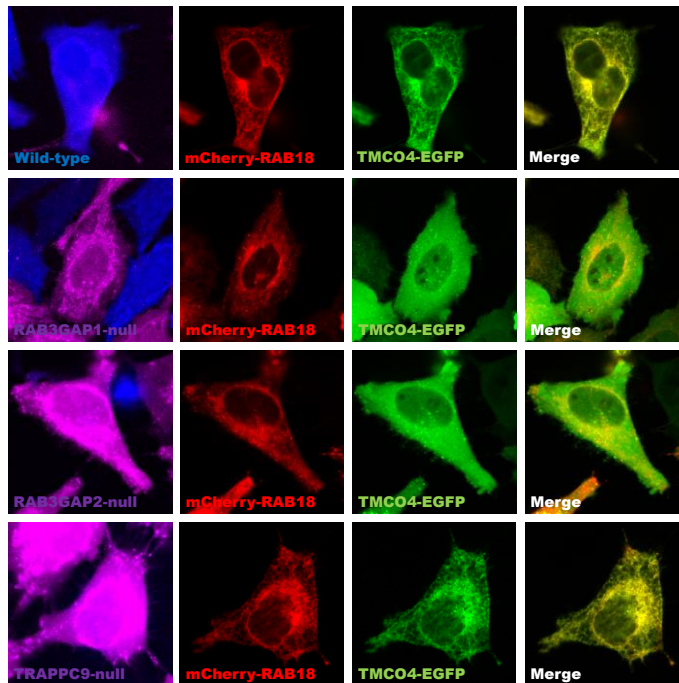

C

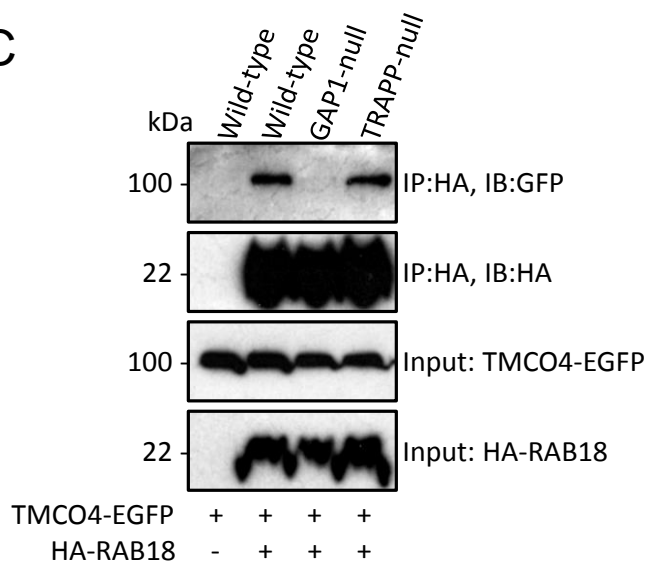

1415 **Figure 6. mCherry-RAB18 recruits TMCO4-EGFP to the ER membrane in a**  
1416 **RAB3GAP-dependent manner.** (A) Confocal micrographs to show diffuse  
1417 localization of exogenous TMCO4-EGFP (Green) compared to mCherry-ER (Red)  
1418 and overlapping localization of exogenous EGFP-RAB18 (Green) and mCherry-ER  
1419 in HeLa cells. (B) Confocal micrographs to show localization of exogenous mCherry-  
1420 RAB18 and TMCO4-EGFP in wild-type cells and in mutant cells of different  
1421 genotypes. Wild-type and mutant cells of the indicated genotypes were labelled with  
1422 CellTrace-Violet and CellTrace-Far Red reagents respectively (magenta and blue  
1423 channels). (C) Immunoprecipitation of exogenous HA-RAB18 from HeLa cells of  
1424 different genotypes. Cells were transfected with the indicated constructs and lysed  
1425 24 hours post-transfection. Anti-HA immunoprecipitates and input samples were  
1426 subjected to SDS-PAGE and immunostaining for HA and GFP.  
1427

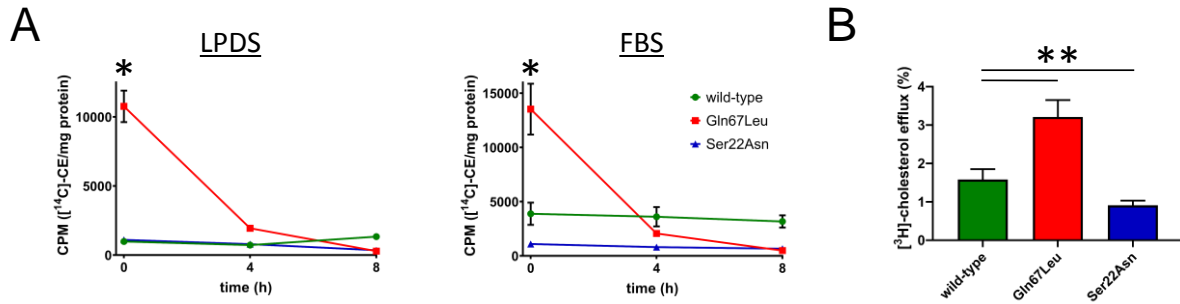

1428

1429 **Figure 7. RAB18 is involved in the mobilization of cholesterol.** (A) Plots to show

1430 cholesteryl ester (CE) loading and efflux. CHO cells, stably expressing RAB18(WT),

1431 RAB18(Gln67Leu) and RAB18(Ser22Asn), were incubated with [<sup>14</sup>C]-oleate, for 24

1432 hours, in the presence of lipoprotein depleted serum (LPDS)(Left panel) or FBS

1433 (Right panel). Following lipid extraction, thin layer chromatography (TLC) was used

1434 to separate CE, and radioactivity was measured by scintillation counting.

1435 Measurements were made at t=0 and at 4 and 8 hours following the addition of

1436 50µg/ml high density lipoprotein (HDL) to the cells. (B) Bar graph to show cholesterol

1437 efflux. The CHO cells were incubated with [<sup>3</sup>H]-cholesterol, for 24 hours, in the

1438 presence of FBS. After washing, they were then incubated with 25µg/ml

1439 apolipoprotein A-I for 5 hours. The quantity of [<sup>3</sup>H]-cholesterol in the media is shown

1440 as a percentage of the total cellular radioactivity (mean+/-SD). \*p<0.01, \*\*p<0.001.

1441
