1 TITLE

2 Comparative proximity biotinylation implicates RAB18 in cholesterol mobilization and  
3 biosynthesis

4

5 RUNNING TITLE

6 GEF-dependent RAB18 interactions

7

8 AUTHORS

9 Robert S. Kiss\*<sup>1</sup>, Jarred Chicoine<sup>1</sup>, Youssef Khalil<sup>2</sup>, Robert Sladek<sup>1</sup>, He Chen<sup>1</sup>,  
10 Alessandro Pisaturo<sup>1</sup>, Cyril Martin<sup>1</sup>, Jessica D. Dale<sup>3</sup>, Tegan A. Brudenell<sup>3</sup>, Archith  
11 Kamath<sup>4,5</sup>, Emanuele Paci<sup>6</sup>, Peter Clayton<sup>2</sup>, Jimi C. Wills<sup>4</sup>, Alex von Kriegsheim<sup>4</sup>,  
12 Tommy Nilsson<sup>1</sup>, Eamonn Sheridan<sup>3</sup>, Mark T. Handley\*<sup>3,7</sup>

13

14 AFFILIATIONS

15 <sup>1</sup>Research Institute of the McGill University Health Centre

16 1001 boul Decarie

17 Glen Site Block E

18 Montreal, QC

19 H4A 3J1

20 Canada

21

22 <sup>2</sup> Genetics and Genomic Medicine

23 Great Ormond Street Institute of Child Health

24 University College London

25 30 Guilford Street

26 London

27 WC1N 1EH

28 United Kingdom

29

30 <sup>3</sup>Leeds Institute of Medical Research

31 St James's University Hospital

32 Leeds

33 LS9 7TF

34 United Kingdom

35

36 <sup>4</sup>Cancer Research UK Edinburgh Centre

37 MRC Institute of Genetics & Molecular Medicine

38 The University of Edinburgh

39 Western General Hospital

40 Edinburgh

41 EH4 2XR

42 United Kingdom

43

44 <sup>5</sup>Medical Sciences Division

45 University of Oxford

46 Oxford

47 OX3 9DU

48 United Kingdom

49

50 <sup>6</sup>Astbury Centre for Structural Molecular Biology

51 University of Leeds

52 Leeds

53 LS2 9JT

54 United Kingdom

55

56 <sup>7</sup>Faculty of Biological Sciences

57 University of Leeds

58 Leeds

59 LS2 9JT

60 United Kingdom.

61

62 \*authors contributed equally

63

64 CORRESPONDING AUTHORS

65 Robert S. Kiss: [robert.kiss@mcgill.ca](mailto:robert.kiss@mcgill.ca)

66 Mark T. Handley: [m.handley@leeds.ac.uk](mailto:m.handley@leeds.ac.uk)

67

68 KEYWORDS

69 RAB18, BioID, Cholesterol, Lathosterol, EBP, ORP2

70

71 SUMMARY STATEMENT

72 We used proximity biotinylation together with guanine nucleotide exchange factor  
73 (GEF)-null cell lines to discriminate functional RAB18-interactions. This approach  
74 revealed that RAB18 mediates lathosterol mobilization and cholesterol biosynthesis.

75

76 ABSTRACT

77 Loss of functional RAB18 causes the autosomal recessive condition Warburg Micro  
78 syndrome. To better understand this disease, we used proximity biotinylation in  
79 HEK293 and HeLa cells to generate an inventory of potential RAB18 effectors. A  
80 restricted set of 25 RAB18-interactions were regulated by the binary RAB3GAP1-  
81 RAB3GAP2 RAB18-guanine nucleotide exchange factor (GEF) complex. These  
82 included three groups of functionally interrelated proteins: a group of microtubule-  
83 interacting/membrane shaping proteins; a group of proteins involved in membrane  
84 tethering and docking; and a group of lipid-modifying/lipid transport proteins. We  
85 provide confirmatory evidence for several of the interactors (SPG20/SPART,  
86 SEC22A, TMCO4). Further we provide functional evidence that RAB18 links the  $\Delta 8$ -  
87  $\Delta 7$  sterol isomerase emopamil binding protein (EBP) to a molecular machinery  
88 mobilizing the products of EBP-catalysis. The cholesterol precursor lathosterol  
89 accumulates in RAB18-null cells, and *de novo* cholesterol biosynthesis is reduced.  
90 Our data demonstrate that GEF-dependent Rab-interactions are highly amenable to  
91 interrogation by proximity biotinylation and suggest that Micro syndrome is a  
92 cholesterol biosynthesis disorder.

93

## 94 INTRODUCTION

95 Rab Proteins are a large subfamily of small GTPases with discrete roles in  
96 coordinating membrane trafficking (Zhen & Stenmark, 2015). They associate with  
97 cellular membranes as a result of their C-terminal prenylation and like other small  
98 GTPases, adopt different conformations and enter into different protein-protein  
99 interactions according to whether they are GDP-, or GTP-bound. For Rab proteins,  
100 cycles of GTP binding and hydrolysis are accompanied by cycles of membrane  
101 association and dissociation that serve to promote the targeting of particular Rab  
102 protein isoforms to particular membrane compartments. Although they possess  
103 some intrinsic GTP-hydrolysis activity, their *in vivo* nucleotide-bound state is tightly  
104 governed in cells by two classes of regulatory proteins. Guanine-nucleotide  
105 exchange factors (GEFs) catalyse the exchange of bound GDP for GTP while  
106 GTPase-activating proteins (GAPs) promote the hydrolysis of bound GTP to GDP  
107 (Barr & Lambright, 2010, Lamber et al., 2019). The dissociation of Rab proteins from  
108 membranes is mediated by GDP-dissociation inhibitor (GDI) proteins. GDIs  
109 sequester GDP-bound Rabs in the cytosol, and are also involved in their  
110 reassociation with membranes (Zhen & Stenmark, 2015).

111 Rab proteins have a variety of roles in the regulation of processes required to confer  
112 compositional identity to membranous organelles and to subdomains within them.  
113 These include membrane remodelling and the establishment of membrane contact  
114 sites (Bui et al., 2010, Raiborg et al., 2015, Rocha et al., 2009, Sobajima et al.,  
115 2018). Where exchange between organelles is mediated by carrier vesicles, these  
116 processes are important in vesicle budding and transport, tethering at the  
117 appropriate target membrane, and fusion (Cai et al., 2007). Under other  
118 circumstances, membrane contact sites may be established to mediate direct fusion  
119 between organelles or to facilitate the transfer of lipids and ions (Langemeyer et al.,  
120 2018, Wickner, 2010, Wu et al., 2018). Rab proteins fulfil their roles by way of  
121 protein-protein interactions with interacting partners termed 'effectors'. These  
122 comprise an array of phylogenetically unrelated protein classes and can serve a  
123 range of molecular functions. As such, they are most usually identified biochemically.

124 Biochemical identification of Rab effectors is challenging; Rab-effector interactions  
125 are usually GTP-dependent and are often highly transient. Immunoprecipitation,  
126 affinity purification and yeast-2-hybrid approaches have each been used but may be

127 more or less effective depending on the Rab isoform studied (Christoforidis et al.,  
128 1999, Fukuda et al., 2008). One newer approach that has yielded identification of a  
129 number of novel interactions is 'BioID' proximity biotinylation utilizing Rab proteins  
130 fused to mutant forms of the promiscuous biotin ligase BirA\*; the Rab fusion protein  
131 biotinylates proximal proteins which are then purified on streptavidin and identified  
132 through mass spectrometry (Gillingham et al., 2019, Liu et al., 2018, Roux et al.,  
133 2012). Biotin labelling occurs in a relatively physiological context, and prospective  
134 effectors can be purified under high stringency conditions. However, a drawback of  
135 the technique is that it does not discriminate between close associations resulting  
136 from functional protein-protein interactions and those resulting from overlapping  
137 localizations.

138 RAB18 is a ubiquitously expressed ancestral Rab protein that localizes to the *cis*-  
139 Golgi, endoplasmic reticulum (ER) and lipid droplets (LDs)(Gerondopoulos et al.,  
140 2014, Handley et al., 2015, Martin et al., 2005, Ozeki et al., 2005). Previous work  
141 has suggested that it functions in the regulation of lipolysis, and lipogenesis (Martin  
142 et al., 2005, Ozeki et al., 2005, Pulido et al., 2011), trafficking between the Golgi and  
143 endoplasmic reticulum (ER) (Dejgaard et al., 2008, Handley et al., 2015), ER  
144 structure (Gerondopoulos et al., 2014), exocytosis (Vazquez-Martinez et al., 2007)  
145 and autophagy (Bekbulat et al., 2018, Feldmann et al., 2017). In order to address  
146 how RAB18 coordinates and performs its roles, we used BioID to generate an  
147 inventory of its potential effectors. To discriminate functional interactions, we used  
148 complementary comparative analyses in HEK293 and HeLa cells. Known RAB18  
149 effectors were more strongly labelled by a fusion of BirA\* and wild-type RAB18 than  
150 by one incorporating an inactive form, RAB18(Ser22Asn), which is deficient in  
151 nucleotide-binding. Similarly, BirA\*-RAB18 labelled known effectors more strongly in  
152 wild-type cells than in cells in which RAB18-GEF activity was disrupted with  
153 CRISPR. Interestingly, disruption of different GEF complexes largely affected  
154 different sets of RAB18 interactions.

155 Biallelic loss-of-function variants in *RAB18* or in the genes encoding the 'RAB3GAP'  
156 RAB18-GEF complex cause the autosomal recessive condition Warburg Micro  
157 syndrome (Aligianis et al., 2005, Bem et al., 2011, Borck et al., 2011, Handley &  
158 Sheridan, 2018, Liegel et al., 2013)(MIMs 600118, 614222, 614225, 615663,  
159 212720). We found that a restricted set of RAB18-interactions were RAB3GAP-

160 dependent, including known and novel effectors in three functional groups. We  
161 present direct validation for several examples including the microtubule-binding  
162 protein SPG20/SPART, the SNARE protein homologue SEC22A and an orphan  
163 lipase TMCO4. Our data strongly support a previous suggestion (Xu et al., 2018) that  
164 RAB18 effectors act collectively in lipid transfer between closely apposed  
165 membranes. Further, we provide evidence that RAB18 serves to coordinate the  
166 generation of the cholesterol precursor lathosterol by the EBP enzyme and its  
167 subsequent mobilization by the lipid transfer protein (LTP) ORP2/OSBPL2. Because  
168 of the clinical overlap between Micro syndrome and conditions including  
169 lathosterolosis (MIM 607330) and Smith-Lemli-Opitz syndrome (SLOS; MIM  
170 270400), our data suggest that impaired cholesterol biosynthesis may partly underlie  
171 Micro syndrome pathology.

172



173 RESULTS

174

175 An inventory of nucleotide-binding-dependent RAB18-associated proteins in HEK293  
176 cells

177 We first generated HEK293 cells stably expressing BirA\*-tagged fusion proteins of  
178 wild-type RAB18, nucleotide-binding deficient RAB18(Ser22Asn) or GTP-hydrolysis  
179 deficient RAB18(Gln67Leu) using the Flp-In system (Figure S1). We then carried out  
180 proximity-labelling, affinity purification and mass spectrometry of biotinylated proteins  
181 as previously described (Roux et al., 2018, Roux et al., 2012). Following removal  
182 from the dataset of previously identified non-specific binders from an in-house  
183 database, a total of 98 proteins were identified as associating with RAB18 across all  
184 samples (see Table S1).

185 The most comprehensive annotation of candidate RAB18 effectors thus far was  
186 made in the 2014 paper by Gillingham et al., which utilized an affinity purification-  
187 mass spectrometry (AP-MS) approach and the *Drosophila* RAB18 orthologue  
188 (Gillingham et al., 2014). In that study, a total of 456 proteins were identified as  
189 interacting with RAB18. However, only 14 of these were well represented in terms of  
190 spectral counts, exhibited low non-specific binding to GST/Sepharose and showed  
191 low binding to other Rab protein isoforms. We took these 14 proteins as the most  
192 plausible physiological RAB18 interactors. Orthologues of 7 of these 14 proteins  
193 were also represented in our BioID data. The number of spectral counts recorded for  
194 these 7 proteins did not clearly distinguish them from the remainder of this BioID  
195 dataset. We therefore proceeded by comparing their differential labelling by the  
196 different RAB18 fusion proteins.

197 We began analyses by exploring the possibility that BirA\*-RAB18(Gln67Leu) fusion  
198 protein would produce enhanced biotinylation of RAB18-effectors (as compared to  
199 BirA\*-RAB18(WT)). We normalized total spectral counts between the BirA\*-  
200 RAB18(Gln67Leu) and BirA\*-RAB18(WT) datasets and then calculated mutant:wild-  
201 type ratios for each RAB18-associated protein (Table S1). Association ratios for  
202 known RAB18-interactors ranged from 0.1-1.49 indicating that RAB18 associations  
203 were altered by the Gln67Leu variant, but not predictably so.

204 We next compared the BirA\*-RAB18(Ser22Asn) and BirA\*-RAB18(WT) datasets  
205 (Figure 1, Table S1). The RAB18-GEF subunits RAB3GAP1 and RAB3GAP2  
206 showed association ratios >1 consistent with the high affinity of Rab-GEFs for  
207 cognate Rabs in their nucleotide-free state. Since most effector-interactions are  
208 GTP-dependent, we ranked other prospective RAB18-interactors according to those  
209 that showed the lowest association ratios. Figure 1B shows the 28 of 98 proteins  
210 with BirA\*-RAB18: BirA\*-RAB18(Ser22Asn) association ratios <0.5. These include  
211 the remaining 5 common interactors from the Gillingham et al. study, several of  
212 which have association ratios of zero, indicating that labelling by BirA\*-  
213 RAB18(Ser22Asn) was absent. These data suggest that comparison of labelling by  
214 wild-type and nucleotide-binding-deficient BirA\*-Rab fusion proteins can be an  
215 effective means to distinguish putative effectors.

216

#### 217 An inventory of RAB18-GEF-dependent RAB18-associated proteins in HeLa cells

218 We had previously used CRISPR to generate a panel of clonal, otherwise isogenic,  
219 HeLa cell lines, null for RAB18 and a number of its regulators (see Figure S2).  
220 Having shown that the BirA\*-RAB18(WT): BirA\*-RAB18(Ser22Asn) comparison in  
221 HEK293 cells was informative, we carried out similar comparisons between BirA\*-  
222 labelling in wild-type and RAB18-GEF deficient HeLa cells (Figure 2A). Since GEF  
223 activity promotes Rab GTP binding, and this is usually necessary for effector  
224 interactions, these interactions will be attenuated in GEF-null cells. RAB3GAP1 and  
225 RAB3GAP2 are each essential subunits of a binary RAB18-GEF complex whereas  
226 TRAPPC9 is reported to be essential for the RAB18-GEF activity of a different GEF,  
227 the multisubunit TRAPPII complex (Gerondopoulos et al., 2014, Li et al., 2017). We  
228 therefore carried out proximity labelling using transient expression of the same  
229 exogenous BirA\*-RAB18 construct in wild-type cells and in RAB3GAP1-,  
230 RAB3GAP2- and TRAPPC9-null cell lines.

231 Prior to mass-spec analysis, samples from each of the streptavidin pull-downs were  
232 subjected to Western blotting to ensure comparable BirA\*-RAB18 expression (Figure  
233 S3A). Label-free quantitative proteomics analyses were used to calculate 'LFQ  
234 intensities' (Cox et al., 2014) for each RAB18-associated protein, which were then  
235 normalized in each experiment according to the quantity of RAB18 found in each

236 sample. Samples from three independent experiments were analysed, and pull-down  
237 samples from untransfected biotin-treated cells were used as controls in each case.  
238 After filtering the data to remove known mass-spec contaminants, and any protein  
239 identified at a high level in control samples, a total of 584, 483 and 506 RAB18-  
240 associated proteins were identified in each experiment. A total of 457 proteins were  
241 present in two or more of the replicate experiments (see Table S2). Orthologues of  
242 10 of the 14 putative RAB18-interacting proteins identified by Gillingham et al. were  
243 identified in the HeLa cell BioID dataset including all 7 of those also identified in the  
244 HEK293 cell dataset. However, as in that dataset, these were not distinguished by  
245 their comparative abundance.

246 Different Rab-GEF complexes may operate in distinct subcellular localizations and  
247 coordinate associations with different effectors (Carney et al., 2006). Therefore, we  
248 assessed whether non-zero intensities for each RAB18-associated protein correlated  
249 between samples (Figure 2B, Figure S3B). Very strong correlations between protein  
250 intensities from RAB3GAP1- and RAB3GAP2-null cells indicated that loss of either  
251 protein had a functionally equivalent effect ( $R^2=0.99$ , see Figure 2B). In contrast,  
252 intensities from RAB3GAP1- and TRAPPC9-null cells were much more poorly  
253 correlated ( $R^2=0.73$ , see Figure S3B). We therefore considered RAB3GAP- and  
254 TRAPPC9-dependent RAB18-associations separately.

255 Of the 457 proteins identified in two or more independent experiments, only 25  
256 showed an association ratio  $<0.5$  in the absence of functional RAB3GAP (Figure 2C-  
257 D, Table S2). These included orthologues of 9 of the 10 proteins identified in the  
258 Gillingham et al. study. Thus, our approach was extremely powerful in discriminating  
259 putative effector proteins. 133 proteins showed an association ratio  $<0.5$  in the  
260 absence of functional TRAPPC9 including the remaining common RAB18-interactor  
261 from the Gillingham et al. study (see Table S2). There was only limited overlap  
262 between RAB3GAP- and TRAPPC9-dependent associations (Figure 2C). Indeed,  
263 among the 28 nucleotide-binding-dependent RAB18 associations identified in  
264 HEK293 cells, 6 were also RAB3GAP-dependent, and 7 were TRAPPC9-dependent  
265 in HeLa cells respectively, but none were both (Figure 1B). Among the 25  
266 RAB3GAP-dependent associations in HeLa cells, only 5 were also TRAPPC9  
267 dependent (Figure 2C, Table S2).

268 One of the TRAPPC9-dependent RAB18 associations was that with TBC1D5, a Tre-  
269 2/Bub/Cdc16 (TBC) domain-containing RAB-GAP with a well characterised role in  
270 regulation of RAB7 (Jia et al., 2016, Jimenez-Orgaz et al., 2018, Seaman et al.,  
271 2009). This was a strong candidate as a RAB18 regulator or effector since it had  
272 also been identified in the HEK293 dataset as well as in several previous studies  
273 (Gillingham et al., 2019, Gillingham et al., 2014). We generated TBC1D5-null HeLa  
274 cells, and first tested whether RAB7 and RAB18 dynamics were altered in these cells  
275 using fluorescence recovery after photobleaching (FRAP). RAB7 dynamics were  
276 substantially different in the TBC1D5-null cells as compared to those in wild-type  
277 cells, consistent with reduced RAB7 GTP-hydrolysis resulting in its reduced GDI-  
278 mediated exchange between membrane and cytosolic compartments (Figure S4A).  
279 In contrast, RAB18 dynamics were unchanged in TBC1D5-null cells compared to  
280 controls (Figure S4B). Further, RAB7 dynamics were unchanged in RAB18-null cells  
281 compared to controls, indicating that RAB18 is not required for TBC1D5 activity  
282 (Figure S4A). These data do not exclude TBC1D5 as a potential RAB18 effector, but  
283 argue against a role for RAB18 in RAB7-regulation under resting conditions.

284

#### 285 Validation screening of RAB3GAP-dependent RAB18 associations

286 Our continued study focused on the 25 RAB3GAP-dependent RAB18 associations  
287 identified in HeLa cells on the basis that these included the majority of known RAB18  
288 effectors together with a number of promising candidate effectors not previously  
289 identified. Encouragingly, many of these also appeared to share interconnected  
290 functions and fell into three main groups (Figure 2D). A group of proteins involved in  
291 membrane shaping, cytoskeletal remodelling and in membrane-microtubule contacts  
292 included SPG20, BICD2, REEP4, CAMSAP1 and FAM134B. Of these, the RAB18-  
293 SPG20 interaction was previously validated (Gillingham et al., 2014), BICD2  
294 interacts with RAB18 among a number of Rab isoforms (Gillingham et al., 2019,  
295 Gillingham et al., 2014) and REEP4 was previously shown to interact with RAB3GAP  
296 (Tinti et al., 2012). Although not previously linked to RAB18, CAMSAP1 and  
297 FAM134B were each identified in both HEK293 and HeLa datasets. Next, a group of  
298 proteins involved in establishing membrane contacts included components of the  
299 NRZ/Dsl1 membrane-tethering complex, ZW10, RINT1 and NBAS, the Sec1/Munc18  
300 (SM) protein SCFD2 and SNAP-REceptor (SNARE) proteins STX18 and BNIP1.

301 These proteins have been previously studied in the context of RAB18 (Gillingham et  
302 al., 2019, Gillingham et al., 2014, Li et al., 2019, Xu et al., 2018, Zhao & Imperiale,  
303 2017). Also in this group were the SNARE protein homologue SEC22A and the ER-  
304 resident multispinning transmembrane protein WFS1, which regulates membrane  
305 contacts between the ER and mitochondria (Angebault et al., 2018). These latter  
306 proteins had not been linked to RAB18 previously. The third group of proteins  
307 associated with RAB18 were a number of lipid transport, exchange and modifying  
308 proteins, C2CD2L, C2CD2, ORP2/OSBP2, INPP5B, EBP and TMCO4.  
309 Interestingly, all but TMCO4 have related lipid species as their known substrates.  
310 C2CD2 and C2CD2L are thought to mediate phosphatidylinositol (PI) transfer  
311 between apposed membranes (Lees et al., 2017), ORP2 has recently been shown to  
312 exchange PI(4,5)P<sub>2</sub> and cholesterol and INPP5B hydrolyses PI(4,5)P<sub>2</sub> to PI(4)P  
313 (Wang et al., 2019). EBP is a  $\Delta 8$ - $\Delta 7$  Sterol Isomerase involved in cholesterol  
314 biosynthesis (Silve et al., 1996). Various members of the OSBP family interact with  
315 Rab proteins (Gillingham et al., 2019, Johansson et al., 2005), and a number of Rab  
316 isoforms interact with INPP5B (Fukuda et al., 2008, Williams et al., 2007), though  
317 associations with RAB18 have not been previously reported.

318 For initial validation of our HeLa dataset, we first carried out an additional  
319 independent BioID experiment with wild-type and RAB3GAP1-null cells and  
320 subjected the resulting samples to Western blotting for selected RAB18-associated  
321 proteins (Figure 3A). As with the mass spectrometry, these proteins showed either  
322 complete (RAB3GAP1, RAB3GAP2, ZW10) or partial (SPG20, STX18) dependence  
323 on RAB3GAP for their RAB18 association.

324 Since RAB18 and its regulators are linked to Warburg Micro syndrome, we asked  
325 whether the putative RAB18 effectors were linked to any diseases with overlapping  
326 clinical features (Figure 3B). Micro syndrome is a clinically distinctive disorder  
327 characterised by intellectual disability (ID), postnatal microcephaly, brain  
328 malformations, ascending spastic paraplegia, neuropathy, hypogonadism and eye  
329 abnormalities that include congenital bilateral cataracts, microphthalmia,  
330 microcornea and optic atrophy (Handley & Sheridan, 2018). Among the RAB3GAP-  
331 dependent RAB18 associations identified in the BioID screen, we noted that several  
332 are encoded by disease-associated genes or their homologues. In common with  
333 Micro syndrome, diseases linked to *SPG20*, *BICD2*, and the *REEP4*-homologues



334 *REEP1* and *REEP2* are associated with ascending paraplegia (hereditary spastic  
335 paraplegia/HSP). *FAM134B* is associated with sensory and autonomic neuropathy,  
336 while the eye features of Micro syndrome overlap a different set of genes. *EBP* is  
337 linked to microphthalmia, microcornea and cataracts as well as to brain  
338 malformations like those in Micro syndrome. Both *WFS1* and *NBAS* have been  
339 linked to conditions associated with optic atrophy, and both *WFS1* and the INPP5B  
340 homologues OCRL1 and INPP5K are linked to conditions associated with congenital  
341 cataracts.

342 Given the suggestive convergences in protein function and gene-disease-  
343 associations, we proceeded to examine the subcellular localizations of 12 putative  
344 effectors for which antibodies were available (Figure 3C-D). To determine whether  
345 the localization of these proteins was altered in cells lacking RAB18, we analysed  
346 wild type and RAB18-null lines in each case. In order to directly compare cells of  
347 different genotypes under otherwise identical conditions, we labelled them with  
348 CellTrace-Violet and CellTrace-Far Red reagents before seeding, immunostaining  
349 and imaging them together. Since RAB18 can localize to LDs, we analysed both  
350 untreated cells (Figure 3C) and cells loaded with oleic acid and labelled with  
351 BODIPY-558/568-C12 (Figure 3D).

352 We observed a variety of staining patterns for the different putative effector proteins.  
353 These ranged from staining that was enriched at the perinuclear region of cells, to  
354 staining that appeared reticular, to staining that appeared more diffuse (Figure 3C).  
355 Each staining pattern was compatible with the known localization of RAB18, which is  
356 distributed between *cis*-Golgi, ER and cytosolic compartments (Handley et al., 2015).  
357 Staining patterns for individual proteins were similar in the HeLa cells and also in  
358 wild-type and RAB18-null RPE1 cells generated to provide biological replicates  
359 (Figure S5). In lipid-loaded cells, we observed that the localizations of proteins with  
360 reticular staining patterns overlapped with LDs, but they did not obviously shift to  
361 adopt an LD localization. However, the two proteins that showed the most diffuse  
362 staining patterns in untreated cells - ZW10 and SPG20 - appeared enriched in the  
363 vicinity of LDs in lipid-loaded cells (Figure 3D).

364 We saw no evidence for dramatic changes in protein localizations in RAB18-null  
365 cells as compared to their wild-type counterparts. Fluorescence intensities in RAB18-  
366 null and wild-type cells were also generally similar, except in the case of staining for

367 SPG20, in which it appeared lower in RAB18-null HeLa cells than in wild-type cells  
368 (Figure 3C).

369

370 Levels of SPG20 are significantly reduced in RAB18-null and TBC1D20-null cells

371 In a RAB18-null mouse model of Warburg Micro syndrome, peripheral nerves have a  
372 disordered cytoskeleton, and there is a striking accumulation of microtubules at  
373 motor nerve terminals (Carpanini et al., 2014). Therefore, interactions between  
374 RAB18 and microtubule-binding proteins is of particular interest. To confirm the  
375 reduction in levels of SPG20 we observed in RAB18-null HeLa cells, we used  
376 quantitative fluorescence microscopy (Figure 4A-C). The SPG20 antibody used in  
377 this study has previously been used for this purpose (Nicholson et al., 2015).  
378 However, to confirm its specificity and also to determine the levels of non-specific  
379 background produced in our experiments, we first analysed SPG20-null cells (Figure  
380 4A-B). Measured fluorescence intensity of SPG20-null cells provided a baseline  
381 level, above which fluorescence levels are proportional to levels of SPG20. In  
382 RAB18-null cells, SPG20 fluorescence was reduced to  $67.16 \pm 3.77\%$  (s.e.m.,  
383  $p < 0.001$ ) of that in wild-type cells (Figure 4C).

384 To determine whether levels of SPG20 were altered by disrupted RAB18 regulation,  
385 we next compared SPG20 fluorescence of wild type, RAB3GAP1-, RAB3GAP2- and  
386 TBC1D20-null cells. Loss of the RAB18-GEF subunits RAB3GAP1 or RAB3GAP2  
387 did not significantly affect levels of SPG20, whereas loss of the RAB18-GAP  
388 TBC1D20 led to a reduction comparable to that in RAB18-null cells ( $57.48\% \pm 2.57$   
389 (s.e.m.,  $p < 0.00005$ ). To rule-out the possibility that reduced SPG20 levels in RAB18-  
390 and TBC1D20-null HeLa cells were the result of clonal variation, we analysed the  
391 corresponding panel of RPE1 cell lines. However, because the RPE1 cells were less  
392 amenable to comparative immunofluorescence experiments than HeLa cells, we  
393 used LFQ analysis of whole cell lysates. As in the HeLa cells, levels of SPG20 were  
394 significantly reduced in RAB18- and TBC1D20-null RPE1 cells compared to wild-  
395 type controls ( $p < 0.05$  following FDR correction), but not in the other genotypes  
396 tested (Figure 4D, Table S3).

397 RAB18, TBC1D20 and the RAB3GAP complex have all been linked to roles in  
398 proteostasis and autophagy (Bekbulat et al., 2018, Feldmann et al., 2017, Sidjanin et

399 al., 2016, Spang et al., 2014). It was therefore possible that reduced SPG20 levels in  
400 RAB18- and TBC1D20-null cells were the result of widespread dysregulation of  
401 proteostasis. To assess this possibility, we compared LFQ data from wild-type and  
402 TBC1D20-null RPE1 and HeLa cells (Tables S3 and S4). Following FDR correction,  
403 only a small number of proteins showed significantly altered levels in each cell type  
404 and there was limited overlap between cell types. This is in-line with a recent study  
405 showing a compensatory mechanism maintains levels of basal autophagy when  
406 RAB18 is absent or dysregulated (Bekbulat et al., 2018). Thus, dysregulation of  
407 SPG20 levels most likely arises from a discrete mechanism.

408 Discrete changes in SPG20 levels in RAB18- and TBC1D20-null cells together with  
409 the previous report of a RAB18-SPG20 interaction (Gillingham et al., 2014) provided  
410 strong evidence for a functional relationship between these proteins. We therefore  
411 carried out co-expression experiments to determine whether they colocalize in cells.  
412 Coexpression of mCherry-RAB18 and mEmerald-SPG20 in HeLa cells showed that,  
413 as previously reported, mCherry-RAB18 adopts a largely reticular localization  
414 (Gerondopoulos et al., 2014) whereas mEmerald-SPG20 appears largely diffuse  
415 (Eastman et al., 2009)(Figure 4E). We did not observe any clear colocalization  
416 between the proteins or any relocalization of mEmerald-SPG20 in cells expressing  
417 mCherry-RAB18. Since both RAB18 and SPG20 localize to LDs, we next explored  
418 whether the localization of either protein to LDs was dependent on the other. In oleic  
419 acid/BODIPY-558/568-C12-loaded HeLa cells, we found that mEmerald-SPG20  
420 became concentrated around LDs, but that its localization was similar in both wild-  
421 type and RAB18-null cells (Figure 4F, left panels). Similarly, EGFP-RAB18 was  
422 enriched around LDs in both wild-type and SPG20-null cells (Figure 4F, right  
423 panels).

424 Collectively, our findings suggest that RAB18 and SPG20 become localized to LDs  
425 independently, and that any RAB18-SPG20 interaction is likely to be transient. The  
426 reduced levels of SPG20 in RAB18- and TBC1D20-null cells seem likely to result  
427 from its reduced stability, and it is intriguing that a transient interaction could  
428 influence this. Nevertheless, this is consistent with the involvement of TBC1D20-  
429 catalysed RAB18 GTP-hydrolysis and accompanying conformational change.

430



431 SEC22A associates with RAB18 and its knockdown causes altered LD morphology

432 The most studied group of RAB18 effector proteins to date are the tethering factors  
433 ZW10, NBAS and RINT1, which together comprise the NRZ/Dsl1 complex  
434 (Gillingham et al., 2014, Li et al., 2019, Xu et al., 2018, Zhao & Imperiale, 2017). The  
435 NRZ complex regulates assembly of an ER SNARE complex containing STX18. The  
436 canonical, fusogenic, form of this complex contains STX18, BNIP1, USE1 and  
437 SEC22B (Spang, 2012, Tagaya et al., 2014). However, it has been proposed that  
438 SEC22B is dispensable for the functions of RAB18, the NRZ complex, STX18,  
439 BNIP1 and USE1 in regulating LDs (Xu et al., 2018). Rather than promoting  
440 membrane fusion it is suggested that, in the absence of SEC22B, these proteins can  
441 mediate the close apposition of membranes to facilitate lipid transfer.

442 In the HEK293 and HeLa BiID datasets, RAB18-associations with all three NRZ  
443 components were nucleotide-binding-dependent and RAB3GAP-dependent  
444 respectively (Figures 1B, 2D, Tables S1, S2). In the HeLa dataset, the ER SNARE  
445 proteins STX18 and BNIP1 were also identified as associating with RAB18 in a  
446 RAB3GAP-dependent manner (Figure 2D, Table S2). Interestingly, also among the  
447 RAB3GAP-dependent RAB18 associations was SEC22A, a poorly studied  
448 homologue of SEC22B.

449 SEC22A is one of two SEC22B homologues in humans, the other being SEC22C.  
450 Like SEC22B, SEC22A and SEC22C possess N-terminal Longin domains and C-  
451 terminal transmembrane (TM) domains. However, they lack the central coiled-coil  
452 SNARE domain through which SEC22B mediates membrane fusion as part of the  
453 STX18 complex. SEC22B localizes to the ER–Golgi intermediate compartment,  
454 whereas different isoforms of SEC22C localize to the ER or *cis*-Golgi (Ge et al.,  
455 2013, Yamamoto et al., 2017, Zhang et al., 1999). The localization of SEC22A had  
456 not been addressed. In the absence of commercially available antibodies for  
457 SEC22A, we examined its localization through expression of an mEmerald-SEC22A  
458 fusion protein (Figure 5A). mEmerald-SEC22A produced a characteristic reticular  
459 staining pattern and colocalized with an exogenous ER marker suggesting that  
460 SEC22A localizes to the ER.

461 We next sought to compare the localization of SEC22A and RAB18 and to determine  
462 whether they interact. However, coexpression of mEmerald-SEC22A and mCherry-

463 RAB18 appeared to disrupt normal ER morphology and to produce vesicular  
464 structures and inclusions positive for both proteins (Figure S6). Although this was not  
465 inconsistent with a protein-protein interaction, it precluded the use of coexpressed  
466 exogenous proteins to test such an interaction. We therefore used a BirA\*-SEC22A  
467 fusion protein to verify the RAB18-SEC22A association, to identify other SEC22A-  
468 associations, and to determine whether these associations were influenced by the  
469 absence of RAB18 or its regulators. To minimize potential toxicity while increasing  
470 biotin-ligase activity, we used BioID2 (Kim et al., 2016) with a p.Gly40Ser active site  
471 modification (Branon et al., 2018) and reduced biotin incubation time to 6 hours. LFG  
472 analysis following streptavidin pull-down and mass spectrometry indicated that  
473 BioID2(Gly40S)-SEC22A was present at much lower levels than the BirA\*-RAB18 in  
474 the prior experiments ( $3.79 \pm 0.96\%$ ). However, after adjusting for non-specific binding  
475 and normalizing the data according to the quantity of BioID2(Gly40S)-SEC22A in  
476 each sample, the construct appeared to label RAB18 in a RAB3GAP-dependent  
477 manner (Figure 5B). RAB3GAP1 and RAB3GAP2, as well as the putative RAB18-  
478 associated proteins REEP4 and BICD2, were among 55 SEC22A-associated  
479 proteins present in samples from wild-type cells in >2 replicate experiments and  
480 represented by >3 spectral counts (Table S5). Furthermore, also among these  
481 proteins, a subset of 9 SEC22A-associations were attenuated (association ratios  
482 <0.5) in samples from both RAB18-null and RAB3GAP-null cells. Broadly, these data  
483 were consistent with a functional SEC22A-RAB18 interaction.

484 Given the involvement of RAB18, the NRZ complex, and a STX18 complex lacking  
485 SEC22B in the regulation of LDs, we asked whether SEC22A might also be involved.  
486 Multiple studies have shown that LD morphology is altered in lipid-loaded cells in  
487 which RAB18 expression - or that of its regulators - is disrupted or silenced, with  
488 fewer and/or larger LDs are observed in these cells compared to controls (Bekbulat  
489 et al., 2018, Carpanini et al., 2014, Gerondopoulos et al., 2014, Li et al., 2017, Liegel  
490 et al., 2013, Xu et al., 2018). Similar observations have been made in ZW10-, NBAS-  
491 , STX18-, BNIP1- and USE1-null cells, whereas LD size distribution is unaltered  
492 when SEC22B expression is silenced (Xu et al., 2018). We examined the effects of  
493 silencing ZW10, NBAS and SEC22A in oleic acid-loaded immortalized human  
494 hepatocyte (IHH) cells (Figure 5C). ZW10 and NBAS silencing provided positive  
495 controls.

496 ZW10 silencing led to a significant reduction in LD number ( $p < 0.001$ ) compared to  
497 controls, whereas NBAS silencing led to both a significant reduction in LD number  
498 and a significant increase in LD size ( $p < 0.001$  in each case). The effects of SEC22A  
499 silencing mirrored those of NBAS silencing, producing a significant reduction in LD  
500 number ( $p < 0.001$ ) and a significant increase in LD size ( $p < 0.001$ ). Together, these  
501 data implicate SEC22A in RAB18-mediated LD regulation.

502

503 RAB18 recruits the orphan lipase TMCO4 to the ER membrane in a RAB3GAP-  
504 dependent manner

505 Among the lipid modifying/mobilizing proteins identified as potential RAB18 effectors  
506 in HeLa cells, TMCO4 was identified in all three replicate experiments and its  
507 association with RAB18 was highly RAB3GAP-dependent (association ratio 0.06).  
508 TMCO4 (transmembrane and coiled-coil domains 4) is annotated as containing  
509 transmembrane and coiled-coil domains, but is orthologous to the Yeast protein Mil1/  
510 Yfl034w. Mil1 was found to be peripherally membrane-associated/soluble, and is  
511 thought to be an  $\alpha/\beta$  hydrolase and a probable lipase based on structural modelling  
512 (Whitfield et al., 2016). Consistent with this, a catalytic triad within its predicted active  
513 site was shown to be required to confer tolerance to the membrane-intercalating  
514 cationic amphipathic drug sertraline (Whitfield et al., 2016). The best template match  
515 produced for TMCO4 by the structural modelling tool Phyre2 (Kelley et al., 2015) is  
516 an acylglycerol/diacylglycerol lipase (Figure S7). To explore the localization of  
517 TMCO4, we expressed TMCO4-EGFP in HeLa cells (Figure 6A). This construct  
518 showed a diffuse appearance consistent with a largely cytosolic localization. In  
519 contrast, EGFP-RAB18 partly localizes to the ER, as shown by its colocalization with  
520 an ER marker.

521 To assess the potential interaction between RAB18 and TMCO4, we coexpressed  
522 mCherry-RAB18 and TMCO4-EGFP (Figure 6B). As in our previous experiments, we  
523 used Celltrace reagents to distinguish cells of wild-type and mutant genotypes and  
524 imaged these on the same dishes. In wild-type HeLa cells, we found that the  
525 coexpression of mCherry-RAB18 led to a dramatic redistribution of TMCO4-EGFP to  
526 the ER membrane suggesting that RAB18 is involved in the recruitment of TMCO4 to  
527 this compartment (Figure 6B, upper panels). This redistribution was completely

528 absent in RAB3GAP1- and RAB3GAP2-null cells but unaffected in TRAPPC9-null  
529 cells consistent with the BioID data. As a means of verifying the interaction, we  
530 carried out immunoprecipitation experiments using exogenous HA-RAB18 and  
531 TMCO4-EGFP (Figure 6C). As expected, TMCO4-EGFP copurified with HA-RAB18  
532 when expressed in wild-type or TRAPPC9-null cells, but not when expressed in  
533 RAB3GAP1-null cells. These data indicate that RAB18 and TMCO4 interact directly  
534 or indirectly as part of a protein complex in a RAB3GAP-dependent manner. Further,  
535 both the microscopy and the immunoprecipitation data support the suggestion that  
536 different GEFs can promote different RAB18-interactions.

537

### 538 RAB18 is involved in cholesterol mobilization and biosynthesis

539 The lipid-related RAB3GAP-dependent RAB18-associated proteins in the HeLa  
540 BioID dataset included ORP2/OSBPL2 and INPP5B, which are robustly linked to a  
541 role in cholesterol mobilization. ORP2 is thought to function as a lipid transfer protein  
542 that delivers cholesterol to the plasma membrane (PM) in exchange for PI(4,5)P<sub>2</sub>,  
543 whereas INPP5B is implicated in the hydrolysis of ORP2-bound PI(4,5)P<sub>2</sub>,  
544 presumably driving the exchange process (Wang et al., 2019). Two other proteins in  
545 this group, C2CD2L/TMEM24 and C2CD2, have not been linked to cholesterol, but  
546 C2CD2L is characterised as a PI transporter and found to promote PM PI(4,5)P<sub>2</sub>  
547 production (Lees et al., 2017). On the basis of these findings, we investigated the  
548 potential role of RAB18 in cholesterol uptake and efflux.

549 We performed loading and efflux experiments to demonstrate the flux of  
550 cholesterol/cholesteryl ester (CE) based on the activity of RAB18. Chinese hamster  
551 ovary (CHO) cells were generated to stably express RAB18(WT), RAB18(Gln67Leu),  
552 or RAB18(Ser22Asn)(Figure S8). These cells were then preincubated with  
553 lipoprotein deficient serum (LPDS) before addition of [<sup>14</sup>C]-oleate for 24 hours. [<sup>14</sup>C]-  
554 oleate was added in the presence of LPDS (Figure 7A, left panel) or 10% FBS  
555 (Figure 7A, right panel). [<sup>14</sup>C]-CE levels were measured at t=0, and efflux was  
556 assessed by measuring CE levels 4 and 8 hours following the addition of high  
557 density lipoprotein (HDL) to the cells. In each case, [<sup>14</sup>C]-CE was isolated by thin  
558 layer chromatography (TLC) and quantified by scintillation counting. Efflux was also  
559 assessed directly by loading the cells with [<sup>3</sup>H]-cholesterol, then incubating them with

560 apolipoprotein (apo) A-I. [<sup>3</sup>H]-cholesterol associated with apoA-I in the medium, as a  
561 percentage of total cellular radioactivity, is shown in Figure 7B.

562 In cells loaded with [<sup>14</sup>C]-oleate/LPDS, levels of CE were comparable in  
563 RAB18(Ser22Asn) and RAB18(WT) cells, whereas RAB18(Gln67Leu) cells stored  
564 significantly more (Figure 7A, left panel). In cells loaded with [<sup>14</sup>C]-oleate/FBS, levels  
565 of CE in RAB18(Ser22Asn) remained unchanged, whereas its storage was elevated  
566 in RAB18(WT) cells and RAB18(Gln67Leu) cells (Figure 7A, right panel).

567 Interestingly, in both [<sup>14</sup>C]-oleate/LPDS-loaded and [<sup>14</sup>C]-oleate/FBS-loaded cells,  
568 the addition of HDL led to rapid depletion of CE in RAB18(Gln67Leu) cells, but not in  
569 RAB18(Ser22Asn) or RAB18(WT) cells (Figure 7A). Consistently, [<sup>3</sup>H]-cholesterol  
570 also underwent significantly more rapid efflux from these cells (Figure 7B).

571 The above data indicated that 'activated' GTP-bound RAB18 strongly promotes the  
572 turnover and mobilization of CE and were consistent with a role for RAB18 in  
573 mediating cholesterol mobilization via ORP2. Given that RAB18 also associated with  
574 EBP in our HeLa dataset, we next explored whether RAB18 might be necessary for  
575 the mobilization of substrates or products of EBP-catalysis. EBP is involved in *de*  
576 *novo* cholesterol biosynthesis (Silve et al., 1996). In the Bloch pathway, it catalyses  
577 the conversion of 5 $\alpha$ -cholesta-8, 24-dien-3 $\beta$ -ol (zymosterol) to 5 $\alpha$ -cholesta-7, 24-  
578 dien-3 $\beta$ -ol (24-dehydrolathosterol). In the Kandutsch-Russel pathway, it catalyses  
579 the conversion of 5 $\alpha$ -cholest-8(9)-en-3 $\beta$ -ol (zymostenol) to 5 $\alpha$ -cholest-7-en-3 $\beta$ -ol  
580 (lathosterol)(Platt et al., 2014). To identify any alteration in sterol levels in RAB18-  
581 null HeLa cells as compared to wild-type cells, we first incubated them for 48 hours  
582 in media supplemented with LPDS, then subjected samples to analysis by GC-MS  
583 (Figure 7C).

584 In RAB18-null cells, we found that levels of the EBP substrate zymostenol were not  
585 significantly different from those in wild-type cells. In contrast, levels of its product  
586 lathosterol were significantly increased ( $p < 0.01$ ). These data are consistent with  
587 intracellular accumulation of lathosterol resulting from a failure in its mobilization  
588 away from the site of its generation by EBP (Figure 7D). Levels of the downstream  
589 intermediate desmosterol were significantly reduced in RAB18-null ( $p < 0.01$ ),  
590 consistent with impaired delivery of substrates to post-EBP biosynthetic enzymes.



591 We reasoned that impaired delivery of cholesterol precursors to post-EBP enzymes  
592 might reduce cholesterol biosynthesis in cells in which RAB18 is absent or  
593 dysregulated. We therefore assessed cholesterol biosynthesis in the HeLa cell lines  
594 by incubating them for 24 hours in media supplemented with LPDS, then treating  
595 them for 24 hours with [<sup>3</sup>H]-acetate or [<sup>3</sup>H]-mevalonate (Figure 7E-F). Free  
596 cholesterol was separated by TLC and labelled cholesterol was quantified by  
597 scintillation counting. Under both conditions, labelling was similar in two clonal wild-  
598 type cell lines, but was reduced in RAB18-, RAB3GAP1-, RAB3GAP2-, TBC1D20-  
599 and TRAPPC9-null cells. Labelling was lowest in RAB18-null cells ( $6.8\pm 0.5\%$  of wild-  
600 type controls for acetate,  $39.5\pm 2.5\%$  for mevalonate) and slightly higher in the  
601 RAB3GAP1-, RAB3GAP2-, TBC1D20- and TRAPPC9-null lines ( $23\pm 2\%$ - $43\pm 3\%$  for  
602 acetate,  $46\pm 2.5\%$ - $73\pm 5\%$  for mevalonate). These data strongly suggest that RAB18  
603 and its regulators are required for normal cholesterol biosynthesis.

604 Our model for the involvement of RAB18 in cholesterol biosynthesis is that it is  
605 facilitates mobilization of EBP-products including lathosterol via ORP2 (Figure 7D).  
606 Structural data are available for the ORP2 OSBP-related domain (ORD)(Wang et al.,  
607 2019). Therefore, to test our model, we generated molecular dynamics simulations of  
608 the ORP2-ORD incorporating either cholesterol or lathosterol (Figure 7G-H, Figure  
609 S9, Videos S1-S2). Over 300ns, both simulations remained comparably stable in  
610 terms of positional root-mean-square deviation (RMSD)(Figure S9A). The pattern of  
611 positional root mean square fluctuations (RSMFs) for ORP2-ORD amino acid  
612 residues in each simulation was also largely similar although some differences were  
613 evident (Figure S9B). Among residues in the vicinity of the sterol, only a single Tyr  
614 residue (Tyr110 in NP\_653081) showed a clear difference. This residue appeared to  
615 fluctuate less in the presence of lathosterol than in the presence of cholesterol.

616 Examination of the simulations suggested that Tyr110 adopts different positions in  
617 the presence of the different sterols (Figure 7G-H, Figure S9C, Videos S1-S2). The  
618 3-hydroxyl of cholesterol maintains a relatively stable distance from the Tyr. In  
619 contrast, the 3-hydroxyl of lathosterol is frequently closer to the Tyr-hydroxyl, though  
620 this varies over the timecourse (Figure S9C). In crystal structures of the OSBP-  
621 related protein Osh4 and sterols, it was noted that water-mediated interactions were  
622 prominent (Im et al., 2005). Therefore, we explored the positioning of water  
623 molecules with respect to lathosterol and cholesterol in our simulations. Interestingly,

624 water molecules were much more frequently found in close proximity to the  
625 lathosterol 3-hydroxyl than to the cholesterol 3-hydroxyl (Figure S9D). Together,  
626 these data suggest that the ligand-binding tunnel of ORP2 adopts a relatively stable  
627 but distinct conformations when bound to cholesterol or lathosterol. Despite their  
628 minor structural differences, stabilization of the lathosterol 3-hydroxyl appears to  
629 involve water-mediated interactions to a greater degree than that of the cholesterol  
630 3-hydroxyl. Plots of the RMSFs of the atoms in each sterol (Figure S9E) show  
631 generally higher fluctuations with lathosterol than with cholesterol. Speculatively, this  
632 may suggest that the interaction with lathosterol is entropically more favourable.  
633

## 634 DISCUSSION

635 The data presented in this study provide preliminary evidence that Warburg Micro  
636 syndrome/RAB18 deficiency is associated with disrupted *de novo* cholesterol  
637 biosynthesis. We have shown that lathosterol accumulates in RAB18-null HeLa cells  
638 suggesting that its delivery to lathosterol oxidase (SC5DL) is impaired. Further, we  
639 have shown that levels of cholesterol biosynthesis are reduced when RAB18 or its  
640 regulators are absent. Pathogenic variants in *SC5DL* cause the rare recessive  
641 disease lathosterolosis, which shares overlapping features with Micro syndrome  
642 including microcephaly, intellectual disability, micrognathia, high arched palate and  
643 cataract (Anderson et al., 2019, Brunetti-Pierri et al., 2002, Ho et al., 2014,  
644 Krakowiak et al., 2003, Rossi et al., 2007). Similarly, the next enzyme in the pathway  
645 is encoded by *DHCR7*, in which pathogenic variants cause Smith-Lemli-Opitz  
646 syndrome (SLOS)(Nowaczyk & Wassif, 1998). While the symptoms of this disorder  
647 can be highly variable, it is among the top differential diagnoses for Micro syndrome  
648 (Handley & Sheridan, 2018).

649 Confirmation that features of Micro syndrome pathology arise from impaired  
650 cholesterol biosynthesis could spur development of therapeutic strategies to treat the  
651 disease. In SLOS, cholesterol supplementation has been widely used and more  
652 recently is being combined with antioxidants with the aim of reducing toxicity from  
653 aberrant cholesterol metabolites (Fliesler et al., 2018, Korade et al., 2014, Svoboda  
654 et al., 2012). Supplementation with fat soluble vitamins may balance deficiencies.  
655 Finally, paradoxical treatment with certain statins has been used in both SLOS and  
656 lathosterolosis and may increase the expression of *DHCR7* (Correa-Cerro et al.,  
657 2006, Ho et al., 2014, Wassif et al., 2017). Careful clinical research will be required  
658 to determine whether such interventions are safe, and whether they have any  
659 efficacy in Micro syndrome.

660 In this study, we have complemented previous work showing that proximity  
661 biotinylation is a powerful means of identifying candidate Rab effectors (Gillingham  
662 et al., 2019). Further – at least in the case of RAB18 - we have found that comparing  
663 biotin-labelling produced by a BirA\*-Rab in wild-type and GEF-deficient cells can be  
664 particularly informative. We found that marked reductions in RAB18-association in  
665 RAB3GAP-null cells were restricted to a relatively small number of proteins and that  
666 these comprised known and/or plausible interactors. By identifying these, we were



667 able to exclude ~95% of RAB18-associations from consideration as more likely to  
668 represent 'noise' from bystander proteins. Interestingly, we found that the disruption  
669 of different GEF complexes affected largely distinct subsets of RAB18 associations.  
670 This may indicate that different RAB18-GEFs control different aspects of RAB18  
671 function.

672 It has been proposed that RAB18 functions to coordinate lipid transfer between  
673 apposed membranes, and our RAB3GAP-dependent interaction data are consistent  
674 with this model (Xu et al., 2018). The 25 RAB3GAP-dependent RAB18 interactors  
675 we identified include microtubule-interacting/membrane-remodelling proteins,  
676 proteins involved in bringing membranes into close apposition, and proteins involved  
677 in lipid modification and mobilization. It seems likely that membrane remodelling  
678 precedes the engagement of tethers and SNAREs and the establishment of  
679 membrane-contacts. Lipid transporter/exchange proteins are required for lipid  
680 transfer to occur at these contact points, while lipid-modifying proteins may serve to  
681 generate substrates for transport and/or concentration gradients necessary to  
682 promote this transport.

683 Three key RAB18 interactors identified in our study were ORP2, INPP5B and EBP.  
684 ORP2 is thought to act as sterol-PI(4,5)P<sub>2</sub> exchanger, whereas INPP5B is thought to  
685 drive the exchange process by catalysing PI(4,5)P<sub>2</sub> hydrolysis (Wang et al., 2019).  
686 The finding that these proteins each associate with RAB18 may suggest that they  
687 function in an analogous manner to OSBP, the phosphatase SACM1L (SAC1) and  
688 the ARF1 GTPase in mediating sterol exchange (Antonny et al., 2018). Because of  
689 the role EBP in cholesterol biosynthesis, we were prompted to explore whether  
690 substrates or products of EBP-catalysis accumulated in the absence of RAB18. The  
691 finding that lathosterol but not zymostenol accumulates suggests that RAB18 is  
692 required to coordinate the mobilization of EBP-products via ORP2 (Figure 7E).

693 The potential role of the other lipid-related proteins identified in our screen, C2CD2L,  
694 C2CD2 and TMCO4, is less clear. However, since C2CD2L is found to transport PI  
695 and to promote PI(4,5)P<sub>2</sub> generation (Lees et al., 2017), it is possible it functions in  
696 concert with ORP2 and INPP5B. TMCO4 is poorly characterized. However, it was  
697 identified in one study as one of a number of genes with upregulated expression in  
698 rabbit cerebral arteries under conditions of hypercholesterolemia (Ong et al., 2013).  
699 Another study suggests it is present on lipid rafts (Jin et al., 2012).

700 The regulated transport of specific sterol intermediates by RAB18 raises the  
701 possibility that other Rab proteins might regulate transport of other intermediates or  
702 regulate the biosynthetic pathways of other lipid species. In addition, it is possible  
703 that particular intermediates might be delivered to different subcellular locations via  
704 different Rabs. Interestingly, INPP5B has been shown in several studies to have a  
705 broad Rab-binding specificity (Fukuda et al., 2008, Williams et al., 2007). Further,  
706 many other phosphoinositide phosphatase enzymes, including members from  
707 distinct protein families, bind to Rab proteins (Gillingham et al., 2019). Similarly,  
708 multiple OSBP-homologues also bind to Rabs (Gillingham et al., 2019, Rocha et al.,  
709 2009, Sobajima et al., 2018, Zhao & Ridgway, 2017). Thus, it is possible that  
710 different Rab isoforms may specify intermembrane transfer of different sterols by  
711 association with different combinations of phosphatase and OSBP proteins.

712 Differential mobilization of intermediates by discrete OSBP-INPP-Rab combinations  
713 is one possible explanation for prominent features of lathosterolosis and SLOS that  
714 do not overlap with Micro syndrome. Several such features resemble those caused  
715 by impaired ciliogenesis, ciliary function or Sonic Hedgehog (SHH) deficiency, and  
716 are ascribed to a deficit in cholesterol at the cilium (Blassberg et al., 2016, Nowaczyk  
717 & Wassif, 1998). It may be that cholesterol biosynthesis at, or its delivery to cilia, is  
718 less affected in Micro syndrome because alternative lipid transfer mechanisms are  
719 involved.

720 One of the clinical features present in Micro syndrome but not in lathosterolosis or  
721 SLOS is ascending spastic paraplegia. In this context, the reduced levels of SPG20  
722 in RAB18- and TBC1D20-null cells may be relevant. Biallelic loss-of-function variants  
723 in *SPG20* cause Troyer syndrome, a complex HSP also characterized by ascending  
724 paraplegia (Baple & Crosby, 2004). SPG20 is a protein of enigmatic function, but  
725 one possible avenue for future research could be the potential relationship between  
726 SPG20 and the other RAB18-associated microtubule (MT)-binding proteins identified  
727 in this study. Like SPG20, CAMSAP1 is found to associate with poles of the mitotic  
728 spindle (Hueschen et al., 2017, Lind et al., 2011). CAMSAP1 is a MT minus-end  
729 binding protein whereas BICD2 is a component of a minus-end-directed dynein-  
730 dynactin motor complex (Hendershott & Vale, 2014, Hueschen et al., 2017,  
731 Urnavicius et al., 2015). REEP4 is localized to the ER, and like RAB18 is linked to  
732 the regulation of ER structure (Gerondopoulos et al., 2014, Kumar et al., 2019).

733 However, it also contributes to the clearance of ER from metaphase chromatin  
734 (Schlaitz et al., 2013). This role is dependent on its MT-binding, and therefore  
735 spindle-binding during metaphase. Thus, these four MT-binding proteins all appear  
736 to function in the same spatiotemporally defined compartment during mitosis (Figure  
737 S10A).

738 Among the membrane tethering and docking proteins associated with RAB18, we  
739 investigated SEC22A on the basis of its homology to SEC22B. SEC22B is a  
740 component of the canonical, fusogenic, syntaxin 18 SNARE complex. Other  
741 components of this complex interact with RAB18 to regulate membrane contacts,  
742 though SEC22B itself is not necessary for this activity (Xu et al., 2018). Reciprocal  
743 proximity biotinylation with a BioID2-SEC22A fusion was consistent with a  
744 RAB3GAP-dependent RAB18-SEC22A interaction, and suggested that other  
745 SEC22A interactions are altered when RAB18 is absent or dysregulated. We also  
746 found that the silencing of SEC22A led to altered LD morphology, similar to that  
747 previously observed when expression of other RAB18-associated tethering/docking  
748 proteins was disrupted. Though our data are tentative, it is tempting to speculate that  
749 SEC22A contributes to a non-fusogenic SNARE complex, since it lacks the SNARE  
750 domain usually required to provide the mechanical force for fusion (Figure S10B).  
751 SNARE proteins can be relatively promiscuous in their interactions, and there are  
752 numerous examples of individual SNAREs contributing to distinct SNARE complexes  
753 (Petkovic et al., 2014, Wang et al., 2017). There are also examples in which SNARE  
754 complexes mediate the stable association of membranes rather than their fusion  
755 (Petkovic et al., 2014).

756 To summarise, we have used complementary proximity ligation approaches together  
757 with CRISPR gene-editing to inventory RAB18-associated proteins. The RAB3GAP-  
758 dependent RAB18-associations we have highlighted are supported by additional  
759 validation and functional evidence as well as by correlative information from the  
760 literature. Broadly, the latter suggests a role for Rab proteins distinct from that in  
761 mediating vesicular membrane traffic. Another role of Rabs may be to assemble a  
762 network of diverse membrane-membrane contact sites and then orchestrate highly  
763 regulated metabolism and flow of lipid species within a discontinuous lipid phase.  
764 Disruption of specific contact sites can produce metabolic deficiency and may cause  
765 human disease.

## 766 MATERIALS AND METHODS

767

### 768 Plasmids

769 Generation of recombinant pcDNA5 FRT/TO FLAG-BirA(Arg118Gly) vectors for  
770 preparation of stable T-Rex-293 cell lines is described below. Generation of  
771 recombinant pX461 and pX462 plasmids for CRISPR gene-editing is described  
772 below. Generation of recombinant pCMV vectors for preparation of stable CHO cell  
773 lines is described below. The EGFP-RAB18 construct has been described previously  
774 (Gerondopoulos et al., 2014). The RAB18 sequence was excised from this construct  
775 using BamHI and HindIII restriction enzymes (New England Biolabs, Hitchin, UK),  
776 and used to generate constructs encoding mEmerald-RAB18 and mCherry-RAB18  
777 by ligation into mEmerald-C1 and mCherry-C1 vectors (Addgene, Watertown, MA)  
778 using HC T4 Ligase and rapid ligation buffer (Promega, Southampton, UK).  
779 Constructs encoding BirA\*-RAB18, BioID2(Gly40Ser)-SEC22A, mEmerald-SEC22A,  
780 mEmerald-SPG20 and mEmerald-RAB7A were generated following PCR  
781 amplification from template and subcloning into an intermediate pCR-Blunt II-TOPO  
782 vector using a Zero Blunt TOPO PCR Cloning Kit (ThermoFisher Scientific,  
783 Waltham, MA) according to manufacturer's instructions. Fragments were excised  
784 from intermediate vectors and then subcloned into target vectors using restriction-  
785 ligation, as above. A construct encoding mCherry-ER was obtained from Addgene,  
786 and a construct encoding TMCO4-EGFP was synthesised and cloned by GeneWiz  
787 (Leipzig, Germany). Details of PCR templates, primers and target vectors are listed  
788 in Table S6.

789

### 790 Antibodies and reagents

791 A custom polyclonal antibody to RAB18 generated by Eurogentec (Southampton,  
792 UK) has been described previously (Handley et al., 2015). An antibody to  
793 RAB3GAP1 was obtained from Bethyl Labs (Montgomery, TX), an antibody to GFP  
794 was obtained from Takara Bio (Saint-Germain-en-Laye, France), an antibody to  $\beta$ -  
795 Tubulin was obtained from Abcam (Cambridge, UK) and an antibody to  $\beta$ -Actin was  
796 obtained from ThermoFisher. Antibodies to hemagglutinin (HA), RAB3GAP2 and  
797 TBC1D20 were obtained from Merck (Gillingham, UK). Antibodies to ZW10, STX18,

798 SPG20, RINT1, REEP4, BNIP1, C2CD2, TRIM13, WFS1, INPP5B, OSBPL2 and  
799 NBAS were obtained from Proteintech (Manchester, UK). Antibody catalogue  
800 numbers and the dilutions used in this study are listed in Table S6.

801

## 802 Cell culture

803 T-REx-293, HeLa and IHH cells were maintained in DMEM media, RPE1 cells in  
804 DMEM/F12 media and CHO cells in alpha-MEM media (ThermoFisher). In each  
805 case, media was supplemented with 10% foetal calf serum (FCS) and 1% penicillin-  
806 streptomycin (PS). Cells were maintained at 37°C and 5% CO<sub>2</sub>.

807

## 808 Generation of stable T-Rex-293 and CHO cell lines

809 PCR products encoding mouse RAB18, RAB18(Gln67Leu) and RAB18(Ser22Asn)  
810 were subcloned into NotI-linearized pcDNA5 FRT/TO FLAG-BirA(Arg118Gly) vector  
811 using the In-Fusion HD EcoDry Cloning Plus kit (Takara Bio) according to  
812 manufacturer's instructions. Details of PCR templates, primers and target vectors are  
813 listed in Table S6. 1.5ug of each recombinant vector together with 13.5ug of pOG44  
814 plasmid (ThermoFisher) were used in cotransfections of T-REx-293 cells, in 10cm  
815 dishes, with TransIT-LT1 Transfection Reagent (Mirus Bio, Madison, WI). 16 hours  
816 following transfection, media was replaced and cells were allowed to recover for 24  
817 hours. Each dish was then split to 4x 10cm dishes in selection media containing 10  
818 ug/ml Blasticidin and 50 ug/ml Hygromycin B. Resistant clones were pooled and  
819 passaged once prior to use.

820 A PCR product encoding mouse RAB18 was subcloned into an intermediate TOPO  
821 vector using a TOPO PCR Cloning Kit (ThermoFisher) according to manufacturer's  
822 instructions. The RAB18 fragment was then excised and subcloned into the pCMV  
823 vector. PCR-based site-directed mutagenesis using a GeneArt kit (ThermoFisher)  
824 was then used to generate pCMV-RAB18(Gln67Leu) and pCMV-RAB18(Ser22Asn)  
825 constructs. CHO cells were transfected using Lipofectamine 2000 reagent  
826 (ThermoFisher) and cells stably-expressing each construct were selected-for with  
827 blasticidin. Under continued selection, clonal cell-lines were grown from single cells  
828 and then RAB18 protein expression was assessed. Cell lines comparably expressing

829 RAB18 constructs at levels 2.5-5x higher than those wild-type cells were used in  
830 subsequent experiments.

831

### 832 Generation of clonal 'knockout' HeLa and RPE1 cell lines

833 CRISPR/Cas9 gene-editing was carried out essentially as described in Ran et al.,  
834 2013 (Ran et al., 2013). Guide RNA (gRNA) sequences are shown in (Table S6). A  
835 list of the clonal cell lines generated for this study, together with the loss-of-function  
836 variants they carry is shown in (Figure S2A). Western blot validation is shown in  
837 (Figure S2B-E). Briefly, for each targeted exon, pairs of gRNA sequences were  
838 selected using the online CRISPR design tool (<http://crispr.mit.edu/>). Oligonucleotide  
839 pairs incorporating these sequences (Sigma) were annealed (at 50mM ea.) in 10mM  
840 Tris pH8, 50mM NaCl and 1mM EDTA by incubation at 95°C for 10 minutes followed  
841 by cooling to room temperature. Annealed oligonucleotides were diluted and ligated  
842 into BbsI-digested pX461 and pX462 plasmids (Addgene) using HC T4 Ligase and  
843 rapid ligation buffer (Promega). Sequences of all recombinant plasmids were verified  
844 by direct sequencing. Pairs of plasmids were cotransfected into cells using  
845 Lipofectamine 2000 reagent according to manufacturer's instructions. Cells were  
846 selected for puromycin resistance (conferred by pX462) using 24 hours puromycin-  
847 treatment. Following 12 hours recovery, they were selected for GFP fluorescence  
848 (conferred by pX461) and cloned using FACSAria2 SORP, Influx or FACSMelody  
849 instruments (BD, Wokingham, UK). After sufficient growth, clones were analysed by  
850 PCR of the targeted exons (Primers are listed in Table S6). In order to sequence  
851 individual gene edited-alleles, PCR products from each clone were first cloned into  
852 ZeroBlunt TOPO vector (ThermoFisher) and then subjected to colony PCR. These  
853 PCR products were then analysed by direct sequencing. Sequencing data was  
854 assessed using BioEdit software (<http://www.mbio.ncsu.edu/BioEdit/bioedit.html>).

855

### 856 BirA/BioID proximity labelling (T-REx-293 cells)

857 The T-REx-293 Cell Lines (described above) were seeded onto 3x 15cm plates each  
858 and allowed to adhere. Expression of BirA\*-RAB18 fusion proteins was induced by  
859 treatment with 20ng/ml Tetracycline for 16 hours. Media was then replaced with  
860 media containing 20% FBS, 20 ng/ml Tetracycline and 50 uM Biotin and the cells



861 were incubated for a further 8 hours, washed with warmed PBS and pelleted in ice-  
862 cold PBS. Cell pellets were snap-frozen and stored at -80°C prior to lysis. Lysis was  
863 carried out in 3ml of ice-cold RIPA buffer (150 mM NaCl, 1% NP40, 0.5% Sodium  
864 Deoxycholate, 0.1% SDS, 1mM EDTA, 50mM Tris, pH 7.4) supplemented with  
865 complete-mini protease inhibitor cocktail (Roche, Basel, Switzerland), 1mM PMSF,  
866 and 62.5 U/ml Benzonase (Merck). Lysates were incubated for 1 hour at 4°C then  
867 sonicated in an ice bath (four 10 second bursts on low power). They were then  
868 clarified by centrifugation, and the supernatants transferred to tubes containing pre-  
869 washed streptavidin-sepharose (30µl bed-volume)(Merck). The beads were  
870 incubated for 3 hours at 4°C, then washed x5 in RIPA buffer and x4 in buffer  
871 containing 100mM NaCl, 0.025% SDS and 25 mM Tris, pH7.4.

872

#### 873 BirA\*/BioID proximity labelling (HeLa cells)

874 Proximity-labelling in HeLa cells was carried out largely as described by Roux et al.  
875 (Roux et al., 2012), but with minor modifications. HeLa cells were grown to 80%  
876 confluence in T75 flasks and then each flask was transfected with 1-1.5µg of the  
877 BirA\*-RAB18 construct or 1µg of the BioID2(Gly40Ser)-SEC22A construct using  
878 Lipofectamine 2000 reagent in Optimem serum-free medium (ThermoFisher) for 4  
879 hours, according to manufacturer's instructions. 24 hours post-transfection, media  
880 was replaced with fresh media containing 50µM Biotin (Merck) and the cells were  
881 incubated for a further 24 or 6 hours (for BirA\*-RAB18 and BioID2(Gly40Ser)-  
882 SEC22A experiments respectively). Cells were then trypsinised and washed twice in  
883 PBS before pellets were transferred to 2ml microcentrifuge tubes and snap-frozen.  
884 For each pellet, lysis was carried out in 420µl of a buffer containing 0.2% SDS, 6%  
885 Triton-X-100, 500mM NaCl, 1mM DTT, EDTA-free protease-inhibitor solution  
886 (Expedeon, Cambridge, UK), 50mM Tris pH7.4. Lysates were sonicated for 10  
887 minutes using a Bioruptor device together with protein extraction beads (Diagenode,  
888 Denville, NJ). Each lysate was diluted with 1080µl 50mM Tris pH7.4, and they were  
889 then clarified by centrifugation at 20 000xg for 30 minutes at 4°C. Affinity purification  
890 of biotinylated proteins was carried out by incubation of clarified lysates with  
891 streptavidin-coated magnetic Dynabeads (ThermoFisher) for 24 hours at 4°C. Note  
892 that a mixture of Dynabeads - MyOne C1, MyOne T1, M270 and M280 – was used

893 to overcome a problem with bead-clumping observed when MyOne C1 beads were  
894 used alone. Successive washes were carried out at room temperature with 2% SDS,  
895 a buffer containing 1% Triton-X-100, 1mM EDTA, 500mM NaCl, 50mM HEPES  
896 pH7.5, a buffer containing 0.5% NP40, 1mM EDTA, 250mM LiCl, 10mM Tris pH7.4,  
897 50mM Tris pH7.4 and 50mM ammonium bicarbonate.

898

#### 899 Preparation of cell lysates for label-free quantitative proteomics

900 RPE1 and HeLa cells were grown to confluence in T75 flasks. They were then  
901 trypsinised, and cell pellets were washed with PBS and snap-frozen prior to use.  
902 RPE1 pellets were resuspended in 300µl 6M GnHCl, 75mM Tris, pH=8.5. HeLa  
903 pellets were resuspended in 300µl 8M urea, 75mM NaCl, 50mM Tris, pH=8.4. In  
904 each case, samples were sonicated for 10 minutes using a Bioruptor device together  
905 with protein extraction beads (Diagenode). RPE1 samples were heated for 5 minutes  
906 at 95°C. Samples were clarified by centrifugation.

907

#### 908 Mass spectrometry

909 Washed beads from BioID experiments with T-Rex-293 cell lines were resuspended  
910 in 50µl 6M urea, 2M thiourea, 10mM Tris, pH=8.5 and DTT was added to 1mM. After  
911 30 minutes incubation at 37°C, samples were alkylated with 5mM iodoacetamide  
912 (IAA) in the dark for 20minutes. DTT was increased to 5mM and 1µg lysC was  
913 added, then samples were incubated at 37°C for 6 hours. Samples were diluted to  
914 1.4M urea, then digested with trypsin (Promega), overnight at 37°C, according to  
915 manufacturer's instructions. Samples were acidified by the addition of 0.9% formic  
916 acid and 5% acetonitrile.

917 Washed beads from BioID experiments with HeLa cells were subjected to limited  
918 proteolysis by trypsin (0.3 ug) at 27°C for 6.5hours in 2mM urea, 1mM DTT, 75mM  
919 Tris, pH=8.5, then supernatants were incubated overnight at 37°C. Samples were  
920 alkylated with 50mM IAA in the dark for 20minutes, then acidified by addition of 8µl  
921 10% trifluoroacetic acid (TFA). RPE1 lysates were reduced and alkylated through  
922 addition of tris(2-carboxyethyl)phosphine (TCEP) and 2-chloroacetamide (CAA) to  
923 5mM and 10mM respectively and then incubated at 95°C for 5 minutes. After



924 cooling, samples were diluted to 3M guanidine and 0.5µg lysC added with incubation  
925 overnight at 37°C. A further dilution to 1M guanidine was followed by digest with  
926 0.3µg trypsin at 37°C for 4 hours. Samples were acidified with TFA. HeLa lysates  
927 were reduced and alkylated by addition of DTT to 10mM, then by addition of IAA to  
928 25mM, then further addition of DTT to 25mM, with incubation at room temperature  
929 for 30-60 minutes following each step. Samples were digested with lysC, overnight at  
930 37°C. They were then diluted to 2M urea, and further digested, overnight at 37°C.  
931 Samples were acidified with TFA.

932 For BioID samples from T-REx-293 cells, LC-MS was carried out as previously  
933 described (Brunet et al., 2016). Briefly, peptides in an aqueous solution containing  
934 5% acetonitrile and 0.1% formic acid were loaded onto a 3 µm PepMap100, 2 cm, 75  
935 µm diameter sample column using an Easy nLC 1000 ultrahigh pressure liquid  
936 chromatography system (ThermoFisher). They were eluted with acetonitrile/formic  
937 acid into an in-line 50 cm separating column (2 µm PepMap C18, 75 µm diameter) at  
938 40°C. Separated peptides were ionized using an Easy Spray nano source and  
939 subjected to MS/MS analysis using a Velos Orbitrap instrument (ThermoFisher).  
940 Following acquisition, data were analysed using SEAQUEST software.

941 For other samples, peptides were loaded on to activated (methanol), equilibrated  
942 (0.1% TFA) C18 stage tips before being washed with 0.1% TFA and eluted with  
943 0.1% TFA/80 acetonitrile. The organic was dried off, 0.1% TFA added to 15 µl and 5  
944 µl injected onto LC-MS. Peptides were separated on an Ultimate nano HPLC  
945 instrument (ThermoFisher), and analysed on either an Orbitrap Lumos or a Q  
946 Exactive Plus instrument (ThermoFisher). After data-dependent acquisition of HCD  
947 fragmentation spectra, data were analysed using MaxQuant and the uniprot human  
948 reference proteome. Versions, releases, parameters and gradients used for  
949 separation are provided in table S6.

950

### 951 Cell labelling

952 In order to distinguish cells of different genotypes within the same well/on the same  
953 coverslip, CellTrace Violet and CellTrace Far Red reagents (ThermoFisher) were  
954 used to label cells before they were seeded. Cells of different genotypes were first  
955 trypsinised and washed with PBS separately. They were then stained in suspension

956 by incubation with either 1 $\mu$ M CellTrace Violet or 200nM CellTrace Far Red for 20  
957 minutes at 37°C. Remaining dye was removed by addition of a ten-fold excess of full  
958 media, incubation for a further 5 minutes, and then by centrifugation and  
959 resuspension of the resulting pellets in fresh media. Differently-labelled cells were  
960 combined prior to seeding.

961

#### 962 Immunofluorescence microscopy

963 HeLa or RPE1 cells were seeded in 96-well glass-bottom plates (PerkinElmer,  
964 Waltham, MA) coated with Matrigel (Corning, Amsterdam, Netherlands) according to  
965 manufacturer's instructions, and allowed to adhere for 48 hours prior to fixation. In  
966 lipid-loading experiments, cells were treated with 200 $\mu$ M oleic acid complexed to  
967 albumin (Merck) and 1 $\mu$ g/ml BODIPY-558/568-C12 (ThermoFisher) for 15 hours  
968 prior to fixation. Cells were fixed using a solution of 3% deionised Glyoxal, 20%  
969 EtOH, 0.75% acetic acid, pH=5 (Richter et al., 2018), for 20 minutes at room  
970 temperature. They were then washed with PBS containing 0.9mM CaCl<sub>2</sub> and 0.5mM  
971 MgCl<sub>2</sub> and blocked with a sterile-filtered buffer containing 1% Milk, 2% donkey serum  
972 (Merck), 0.05% Triton-X-100 (Merck), 0.9mM CaCl<sub>2</sub> and 0.5mM MgCl<sub>2</sub> in PBS  
973 pH=7.4 for at least 1 hour prior to incubation with primary antibody. Primary  
974 antibodies were added in blocking buffer without Triton-X-100, and plates were  
975 incubated overnight at 4°C. Antibody dilutions are listed in Table S6. Following  
976 washing in PBS, cells were incubated with 1:2000 Alexa 488-conjugated secondary  
977 antibody (ThermoFisher) in blocking buffer at room temperature for 1-2 hours.  
978 Following further washing in PBS, cells were imaged using an Operetta High Content  
979 Imaging System (PerkinElmer) equipped with Harmony software. In comparative  
980 fluorescence quantitation experiments, at least 18 frames – each containing >5 wild-  
981 type and >5 mutant cells – were analysed per genotype. ImageJ software was used  
982 to produce regions of interest (ROIs) corresponding to each cell using thresholding  
983 tools and images from the 405nm and 645nm channels. Median 490nm fluorescence  
984 intensity was measured for each cell and mutant fluorescence intensity (as %wild-  
985 type) was calculated for each frame and combined for each genotype.

986

#### 987 Confocal microscopy – Live cell imaging

988 HeLa or RPE1 cells were seeded on glass-bottom dishes (World Precision  
989 Instruments, Hitchin, UK) coated with Matrigel (Corning) and allowed to adhere for  
990 24 hours prior to transfection. Transfections and cotransfections were carried out  
991 with 0.5µg of each of the indicated constructs using Lipofectamine 2000 reagent in  
992 Optimem serum-free medium for 4 hours, according to manufacturer's instructions.  
993 Media were replaced and cells were allowed to recover for at least 18 hours prior to  
994 imaging. Imaging was carried out on a Nikon A1R confocal microscope equipped  
995 with the Nikon Perfect Focus System using a 60× oil immersion objective with a 1.4  
996 numerical aperture. In immunofluorescence experiments, the pinhole was set to  
997 airy1. CellTrace Violet was excited using a 403.5nm laser, and emitted light was  
998 collected at 425–475nm. EGFP and mEmerald were excited using a 488 nm laser,  
999 and emitted light was collected at 500–550 nm. BODIPY-558/568-C12 and mCherry  
1000 were excited using a 561.3 nm laser, and emitted light was collected at 570–620 nm.  
1001 CellTrace Far Red was excited using a 638nm laser, and emitted light was collected  
1002 at 663-738nm. In fluorescence recovery after photobleaching (FRAP) experiments,  
1003 the pinhole was set to airy2 and digital zoom parameters were kept constant.  
1004 Bleaching was carried out using 90% laser power.

1005

#### 1006 Immunoprecipitation

1007 HeLa cells were seeded onto 10cm dishes and allowed to adhere for 24 hours prior  
1008 to transfection. Transfections and cotransfections were carried out with 0.5µg of  
1009 each of the indicated constructs using Lipofectamine 2000 reagent in Optimem  
1010 serum-free medium for 4 hours, according to manufacturer's instructions. 24 hours  
1011 post-transfection cells were trypsinised, washed with PBS, then lysed in a buffer  
1012 containing 150mM NaCl, 0.5% Triton-X-100 and EDTA-free protease-inhibitor  
1013 solution (Expedeon), 10mM Tris, pH=7.4. Lysates were clarified by centrifugation,  
1014 input samples taken, and the remaining supernatants then added to 4µg rabbit anti-  
1015 HA antibody (Merck). After 30 minutes incubation at 4°C on a rotator, 100µl washed  
1016 protein G-coupled Dynabeads (ThermoFisher) were added and samples were  
1017 incubated for a further 1 hour. The Dynabeads were washed x3 with buffer  
1018 containing 150mM NaCl, 0.1% Triton-X-100, 10mM Tris, pH=7.4, then combined with  
1019 a reducing loading buffer and subjected to SDS–PAGE.

1020 Lipid loading experiments

1021 For LD number and diameter measurements, IHH cells were seeded onto glass  
1022 coverslips. siRNA transfections were carried out using FuGene reagent (Promega)  
1023 according to manufacturer's instructions. siRNAs targeting ZW10 and NBAS were  
1024 obtained from IDT, Coralville, IA; siRNA targeting SEC22A was obtained from  
1025 Horizon Discovery, Cambridge, UK. 48 hours following transfection, cells were  
1026 treated with 200nM BSA conjugated oleate for 24 hours. Coverslips were washed,  
1027 fixed with 3% paraformaldehyde and stained with 1ug/mL BODIPY and 300nM DAPI.  
1028 Fluorescence images were captured on a Zeiss LSM 780 confocal microscope  
1029 equipped with a 100x objective. Images were analysed using ImageJ software. Data  
1030 are derived from measurements from >100 cells/condition and are representative of  
1031 three independent experiments.

1032 For cholesterol storage and efflux experiments with [<sup>14</sup>C]-oleate, CHO cell lines  
1033 (described above) were seeded onto 12-well plates and then grown to 60-75%  
1034 confluence in Alpha media supplemented with 10% LPDS. Cells were grown in the  
1035 presence of 10% LPDS for at least 24 hours prior to the addition of oleate. 1 µCi/ml  
1036 [<sup>14</sup>C]-oleate (Perkin Elmer) was added in the presence of 10% LPDS or 10% FBS for  
1037 24 hours. Cells were then washed and incubated with 50µg/ml HDL for 0, 4 or 8  
1038 hours. Cellular lipids were extracted with hexane. Lipids were then dried-down and  
1039 separated by thin layer chromatography (TLC) in a hexane:diethyl ether:acetic acid  
1040 (80:20:2) solvent system. TLC plates were obtained from Analtech, Newark, NJ.  
1041 Bands corresponding to cholesteryl ester (CE) were scraped from the TLC plate, and  
1042 radioactivity was determined by scintillation counting in a Beckman Coulter LS6500  
1043 Scintillation Counter using BetaMax ES Liquid Scintillation Cocktail (ThermoFisher).  
1044 Three independent experiments were carried out, each with four replicates of each  
1045 condition. Data from a representative experiment are shown.

1046 For cholesterol efflux experiments with [<sup>3</sup>H]-cholesterol, CHO cells were seeded onto  
1047 12-well plates and then grown to 60% confluence in Alpha media supplemented with  
1048 10% FBS. 5 µCi/ml [<sup>3</sup>H]-cholesterol (PerkinElmer) was added in the presence of 10%  
1049 FBS. After 3x PBS washes, cells were incubated with serum-free media containing  
1050 25µg/ml of human apolipoprotein A-I (ApoA-I) for 5 hours. ApoA-I was a kind gift of  
1051 Dr. Paul Weers (California State University, Long Beach). Radioactivity in aliquots of

1052 media were determined by scintillation counting in a Beckman Coulter LS6500  
1053 Scintillation Counter using LSC Cocktail (PerkinElmer). Cell lysates were produced  
1054 by addition of 0.1N NaOH for 1 hour, and their radioactivity was determined as  
1055 above. Cholesterol efflux was calculated as an average (+/- SD) of the % cholesterol  
1056 efflux (as a ratio of the media cpm/(media + cellular cpm) x 100%).

1057

#### 1058 Sterol analysis

1059 HeLa cells were grown to 80% confluence in T75 flasks, washed twice in PBS and  
1060 then grown for a further 48 hours in DMEM supplemented with 10% LPDS. They  
1061 were then trypsinised and washed twice in PBS before pellets were transferred to  
1062 microcentrifuge tubes and snap-frozen. Pellets were resuspended in 200µl deionised  
1063 water, sonicated for 20 seconds using an ultrasonic processor (Sonics & Materials  
1064 Inc., CT, USA), then placed on ice. 750 µl of isopropanol containing 4 µmol/L 5α-  
1065 cholestane as an internal standard was added to each sample, and then each was  
1066 sonicated for a further 10 seconds. Lysates were transferred to 7ml glass vials and  
1067 mixed with 250 µL tetramethylammonium hydroxide for alkalyine saponification at  
1068 80°C for 15 min, then cooled down for 10 minutes at room temperature. Sterols were  
1069 extracted by addition of 500 µL tetrachloroethylene/methyl butyrate (1:3) and 2 ml  
1070 deionised water, then thorough mixing. Samples were centrifuged for 10 minutes at  
1071 3000 rpm, and the organic phase containing the sterols was transferred to 300 µl GC  
1072 vials. Extracts were dried under a stream of nitrogen, then sterols were silylated with  
1073 50 µL Tri-Sil HTP (HDMS:TMCS:Pyridine) Reagent (ThermoFisher) at 60°C for 1  
1074 hour.

1075 Chromatography separation was performed on an Agilent gas chromatography-mass  
1076 spectrometry (GC-MS) system (6890A GC and 5973 MS) (Agilent Technologies,  
1077 Inc., CA, USA) with an HP-1MS capillary column (30 m length. x 250 µm diameter x  
1078 0.25 µm film thickness). The GC temperature gradient was as follows: Initial  
1079 temperature of 120°C increased to 200°C at a rate of 20°C/min, then increased to  
1080 300°C at a rate of 2°C/min with a 15 minute solvent delay. Injection was at 250°C in  
1081 splitless mode with ultrapurified helium as the carrier gas and the transfer line was  
1082 280°C. The mass spectra were acquired by electron impact at 70 eV using selected  
1083 ion monitoring as follows: Lathosterol-TMS, cholesterol-TMS, and cholest8(9)-enol-

1084 TMS: m/z 458; 5 $\alpha$ -cholestane and desmosterol-TMS: m/z 372; Lanosterol-TMS: m/z  
1085 393; and 7-dehydrocholesterol-TMS: m/z 325. The data were analysed using  
1086 MassHunter Workstation Quantitative Analysis Software (Agilent Technologies, Inc.)  
1087 and OriginPro 2017 (OriginLab Corp, MA, USA).

1088

#### 1089 Cholesterol biosynthesis assays

1090 HeLa cell lines (described above) were seeded onto 10 cm plates and then grown in  
1091 DMEM supplemented with 10% LPDS for 24 hours. Cells were washed and then  
1092 incubated with 10 $\mu$ Ci/ml [ $^3$ H]-acetate or 5 $\mu$ Ci/ml [ $^3$ H]-mevalonate (Perkin Elmer) in  
1093 the presence of 10% LPDS for another 24 hours. Cellular lipids were extracted with  
1094 hexane and then evaporated to dryness. Cell lysates were produced by addition of  
1095 0.1N NaOH for 1 hour. Free cholesterol was separated by TLC in a hexane:diethyl  
1096 ether:methanol:acetic acid (80:20:3:1.5) solvent system. TLC plates were obtained  
1097 from Analtech, Newark, NJ. Bands corresponding to free cholesterol were scraped  
1098 from the TLC plate, and radioactivity was determined by scintillation counting in a  
1099 Beckman Coulter LS6500 Scintillation Counter using BetaMax ES Liquid Scintillation  
1100 Cocktail (ThermoFisher).

1101

#### 1102 Molecular dynamics

1103 Simulations were constructed as previously described, starting from a modified  
1104 version of the OSBPL2 lipid-binding domain structure (PDB 5ZM8)(Wang et al.,  
1105 2019). Parameters for lathosterol were obtained by modifying those of cholesterol to  
1106 substituting the double bond between C5-C6 with one between C7-C8. Simulations  
1107 were performed with the CHARMM36 force field.

1108

#### 1109 Western blotting

1110 Cell lysates were made with a buffer containing 150mM NaCl, 0.5% Triton-X-100  
1111 and EDTA-free protease-inhibitor solution (Expedeon), 50mM Tris, pH=7.4. Cell  
1112 lysates and input samples from BioID and immunoprecipitation experiments were



1113 combined 1:1 with a 2x reducing loading buffer; a reducing loading buffer containing  
1114 10mM EDTA was added directly to Dynabead samples. SDS–PAGE and Western  
1115 blotting were carried out according to standard methods.

1116

#### 1117 ACKNOWLEDGEMENTS

1118 We thank the Warburg Micro syndrome children and their families. We thank  
1119 Professor C. A. Johnson and Dr J. A. Poulter for a critical reading of the manuscript  
1120 and Professor Jia-Wei Wu for sharing structural data.

1121

#### 1122 COMPETING INTERESTS

1123 No competing interests declared.

1124

#### 1125 FUNDING

1126 MH is supported by the University of Leeds and by a Programme Grant from the  
1127 Newlife Foundation for Disabled Children (Grant Reference Number: 17-18/23).

1128

#### 1129 DATA AVAILABILITY

1130 The mass spectrometry proteomics data have been deposited to the  
1131 ProteomeXchange Consortium via the PRIDE (Perez-Riverol et al., 2019) partner  
1132 repository with the dataset identifiers PXD016631, PXD016336, PXD016326,  
1133 PXD016233 and PXD016404.



1134 REFERENCES

- 1135 Aligianis IA, Johnson CA, Gissen P, Chen D, Hampshire D, Hoffmann K, Maina EN,  
1136 Morgan NV, Tee L, Morton J, Ainsworth JR, Horn D, Rosser E, Cole TR, Stolte-  
1137 Dijkstra I, Fieggen K, Clayton-Smith J, Megarbane A, Shield JP, Newbury-Ecob R et  
1138 al. (2005) Mutations of the catalytic subunit of RAB3GAP cause Warburg Micro  
1139 syndrome. *Nat Genet* 37: 221-3
- 1140 Anderson R, Rust S, Ashworth J, Clayton-Smith J, Taylor RL, Clayton PT, Morris  
1141 AAM (2019) Lathosterolosis: A Relatively Mild Case with Cataracts and Learning  
1142 Difficulties. *JIMD Rep* 44: 79-84
- 1143 Angebault C, Fauconnier J, Patergnani S, Rieusset J, Danese A, Affortit CA,  
1144 Jagodzinska J, Megy C, Quiles M, Cazevieille C, Korchagina J, Bonnet-Wersinger D,  
1145 Milea D, Hamel C, Pinton P, Thiry M, Lacampagne A, Delprat B, Delettre C (2018)  
1146 ER-mitochondria cross-talk is regulated by the Ca(2+) sensor NCS1 and is impaired  
1147 in Wolfram syndrome. *Sci Signal* 11
- 1148 Antony B, Bigay J, Mesmin B (2018) The Oxysterol-Binding Protein Cycle: Burning  
1149 Off PI(4)P to Transport Cholesterol. *Annu Rev Biochem* 87: 809-837
- 1150 Baple E, Crosby A (2004) Troyer Syndrome. In *GeneReviews((R))*, Adam MP,  
1151 Ardinger HH, Pagon RA, Wallace SE, Bean LJH, Stephens K, Amemiya A (eds)  
1152 Seattle (WA):
- 1153 Barr F, Lambright DG (2010) Rab GEFs and GAPs. *Curr Opin Cell Biol* 22: 461-70
- 1154 Bekbulat F, Schmitt D, Feldmann A, Huesmann H, Eimer S, Juretschke T, Beli P,  
1155 Behl C, Kern A (2018) RAB18 impacts autophagy via lipid droplet-derived lipid  
1156 transfer and is rescued by ATG9A. *bioRxiv*: 421677
- 1157 Bem D, Yoshimura S, Nunes-Bastos R, Bond FC, Kurian MA, Rahman F, Handley  
1158 MT, Hadzhiev Y, Masood I, Straatman-Iwanowska AA, Cullinane AR, McNeill A,  
1159 Pasha SS, Kirby GA, Foster K, Ahmed Z, Morton JE, Williams D, Graham JM,  
1160 Dobyns WB et al. (2011) Loss-of-function mutations in RAB18 cause Warburg micro  
1161 syndrome. *Am J Hum Genet* 88: 499-507
- 1162 Blassberg R, Macrae JI, Briscoe J, Jacob J (2016) Reduced cholesterol levels impair  
1163 Smoothed activation in Smith-Lemli-Opitz syndrome. *Hum Mol Genet* 25: 693-705
- 1164 Borck G, Wunram H, Steiert A, Volk AE, Korber F, Roters S, Herkenrath P, Wollnik  
1165 B, Morris-Rosendahl DJ, Kubisch C (2011) A homozygous RAB3GAP2 mutation  
1166 causes Warburg Micro syndrome. *Human genetics* 129: 45-50
- 1167 Branon TC, Bosch JA, Sanchez AD, Udeshi ND, Svinkina T, Carr SA, Feldman JL,  
1168 Perrimon N, Ting AY (2018) Efficient proximity labeling in living cells and organisms  
1169 with TurboID. *Nat Biotechnol* 36: 880-887
- 1170 Brunet S, Saint-Dic D, Milev MP, Nilsson T, Sacher M (2016) The TRAPP Subunit  
1171 Trs130p Interacts with the GAP Gyp6p to Mediate Ypt6p Dynamics at the Late Golgi.  
1172 *Front Cell Dev Biol* 4: 48
- 1173 Brunetti-Pierri N, Corso G, Rossi M, Ferrari P, Balli F, Rivasi F, Annunziata I,  
1174 Ballabio A, Russo AD, Andria G, Parenti G (2002) Lathosterolosis, a novel multiple-  
1175 malformation/mental retardation syndrome due to deficiency of 3beta-  
1176 hydroxysteroid-delta5-desaturase. *Am J Hum Genet* 71: 952-8

- 1177 Bui M, Gilady SY, Fitzsimmons RE, Benson MD, Lynes EM, Gesson K, Alto NM,  
1178 Strack S, Scott JD, Simmen T (2010) Rab32 modulates apoptosis onset and  
1179 mitochondria-associated membrane (MAM) properties. *The Journal of biological*  
1180 *chemistry* 285: 31590-602
- 1181 Cai H, Reinisch K, Ferro-Novick S (2007) Coats, tethers, Rabs, and SNAREs work  
1182 together to mediate the intracellular destination of a transport vesicle. *Developmental*  
1183 *cell* 12: 671-82
- 1184 Carney DS, Davies BA, Horazdovsky BF (2006) Vps9 domain-containing proteins:  
1185 activators of Rab5 GTPases from yeast to neurons. *Trends Cell Biol* 16: 27-35
- 1186 Carpanini SM, McKie L, Thomson D, Wright AK, Gordon SL, Roche SL, Handley MT,  
1187 Morrison H, Brownstein D, Wishart TM, Cousin MA, Gillingwater TH, Aligianis IA,  
1188 Jackson IJ (2014) A novel mouse model of Warburg Micro syndrome reveals roles  
1189 for RAB18 in eye development and organisation of the neuronal cytoskeleton.  
1190 *Disease models & mechanisms* 7: 711-22
- 1191 Christofridis S, McBride HM, Burgoyne RD, Zerial M (1999) The Rab5 effector  
1192 EEA1 is a core component of endosome docking. *Nature* 397: 621-5
- 1193 Correa-Cerro LS, Wassif CA, Kratz L, Miller GF, Munasinghe JP, Grinberg A, Fliesler  
1194 SJ, Porter FD (2006) Development and characterization of a hypomorphic Smith-  
1195 Lemli-Opitz syndrome mouse model and efficacy of simvastatin therapy. *Hum Mol*  
1196 *Genet* 15: 839-51
- 1197 Cox J, Hein MY, Luber CA, Paron I, Nagaraj N, Mann M (2014) Accurate proteome-  
1198 wide label-free quantification by delayed normalization and maximal peptide ratio  
1199 extraction, termed MaxLFQ. *Mol Cell Proteomics* 13: 2513-26
- 1200 Dejgaard SY, Murshid A, Erman A, Kizilay O, Verbich D, Lodge R, Dejgaard K, Ly-  
1201 Hartig TB, Pepperkok R, Simpson JC, Presley JF (2008) Rab18 and Rab43 have  
1202 key roles in ER-Golgi trafficking. *J Cell Sci* 121: 2768-81
- 1203 Eastman SW, Yassaee M, Bieniasz PD (2009) A role for ubiquitin ligases and  
1204 Spartin/SPG20 in lipid droplet turnover. *The Journal of cell biology* 184: 881-94
- 1205 Feldmann A, Bekbulat F, Huesmann H, Ulbrich S, Tatzelt J, Behl C, Kern A (2017)  
1206 The RAB GTPase RAB18 modulates macroautophagy and proteostasis. *Biochem*  
1207 *Biophys Res Commun* 486: 738-743
- 1208 Fliesler SJ, Peachey NS, Herron J, Hines KM, Weinstock NI, Ramachandra Rao S,  
1209 Xu L (2018) Prevention of Retinal Degeneration in a Rat Model of Smith-Lemli-Opitz  
1210 Syndrome. *Sci Rep* 8: 1286
- 1211 Fukuda M, Kanno E, Ishibashi K, Itoh T (2008) Large scale screening for novel rab  
1212 effectors reveals unexpected broad Rab binding specificity. *Mol Cell Proteomics* 7:  
1213 1031-42
- 1214 Ge L, Melville D, Zhang M, Schekman R (2013) The ER-Golgi intermediate  
1215 compartment is a key membrane source for the LC3 lipidation step of  
1216 autophagosome biogenesis. *Elife* 2: e00947
- 1217 Gerondopoulos A, Bastos RN, Yoshimura S, Anderson R, Carpanini S, Aligianis I,  
1218 Handley MT, Barr FA (2014) Rab18 and a Rab18 GEF complex are required for  
1219 normal ER structure. *The Journal of cell biology* 205: 707-20

- 1220 Gillingham AK, Bertram J, Begum F, Munro S (2019) In vivo identification of GTPase  
1221 interactors by mitochondrial relocalization and proximity biotinylation. *Elife* 8
- 1222 Gillingham AK, Sinka R, Torres IL, Lilley KS, Munro S (2014) Toward a  
1223 comprehensive map of the effectors of rab GTPases. *Developmental cell* 31: 358-73
- 1224 Handley M, Sheridan E (2018) RAB18 Deficiency. In *GeneReviews((R))*, Adam MP,  
1225 Ardinger HH, Pagon RA, Wallace SE, Bean LJH, Stephens K, Amemiya A (eds)  
1226 Seattle (WA):
- 1227 Handley MT, Carpanini SM, Mali GR, Sidjanin DJ, Aligianis IA, Jackson IJ,  
1228 FitzPatrick DR (2015) Warburg Micro syndrome is caused by RAB18 deficiency or  
1229 dysregulation. *Open biology* 5: 150047
- 1230 Hendershott MC, Vale RD (2014) Regulation of microtubule minus-end dynamics by  
1231 CAMSAPs and Patronin. *Proc Natl Acad Sci U S A* 111: 5860-5
- 1232 Ho AC, Fung CW, Siu TS, Ma OC, Lam CW, Tam S, Wong VC (2014)  
1233 Lathosterolosis: a disorder of cholesterol biosynthesis resembling smith-lemli-opitz  
1234 syndrome. *JIMD Rep* 12: 129-34
- 1235 Hueschen CL, Kenny SJ, Xu K, Dumont S (2017) NuMA recruits dynein activity to  
1236 microtubule minus-ends at mitosis. *Elife* 6
- 1237 Im YJ, Raychaudhuri S, Prinz WA, Hurley JH (2005) Structural mechanism for sterol  
1238 sensing and transport by OSBP-related proteins. *Nature* 437: 154-8
- 1239 Jia D, Zhang JS, Li F, Wang J, Deng Z, White MA, Osborne DG, Phillips-Krawczak  
1240 C, Gomez TS, Li H, Singla A, Burstein E, Billadeau DD, Rosen MK (2016) Structural  
1241 and mechanistic insights into regulation of the retromer coat by TBC1d5. *Nat*  
1242 *Commun* 7: 13305
- 1243 Jimenez-Organ A, Kvainickas A, Nagele H, Denner J, Eimer S, Dengjel J, Steinberg  
1244 F (2018) Control of RAB7 activity and localization through the retromer-TBC1D5  
1245 complex enables RAB7-dependent mitophagy. *EMBO J* 37: 235-254
- 1246 Jin J, Sison K, Li C, Tian R, Wnuk M, Sung HK, Jeansson M, Zhang C, Tucholska M,  
1247 Jones N, Kerjaschki D, Shibuya M, Fantus IG, Nagy A, Gerber HP, Ferrara N,  
1248 Pawson T, Quaggin SE (2012) Soluble FLT1 binds lipid microdomains in podocytes  
1249 to control cell morphology and glomerular barrier function. *Cell* 151: 384-99
- 1250 Johansson M, Lehto M, Tanhuanpaa K, Cover TL, Olkkonen VM (2005) The  
1251 oxysterol-binding protein homologue ORP1L interacts with Rab7 and alters  
1252 functional properties of late endocytic compartments. *Mol Biol Cell* 16: 5480-92
- 1253 Kelley LA, Mezulis S, Yates CM, Wass MN, Sternberg MJ (2015) The Phyre2 web  
1254 portal for protein modeling, prediction and analysis. *Nat Protoc* 10: 845-58
- 1255 Kim DI, Jensen SC, Noble KA, Kc B, Roux KH, Motamedchaboki K, Roux KJ (2016)  
1256 An improved smaller biotin ligase for BioID proximity labeling. *Mol Biol Cell* 27: 1188-  
1257 96
- 1258 Korade Z, Xu L, Harrison FE, Ahsen R, Hart SE, Folkes OM, Mirnics K, Porter NA  
1259 (2014) Antioxidant supplementation ameliorates molecular deficits in Smith-Lemli-  
1260 Opitz syndrome. *Biol Psychiatry* 75: 215-22
- 1261 Krakowiak PA, Wassif CA, Kratz L, Cozma D, Kovarova M, Harris G, Grinberg A,  
1262 Yang Y, Hunter AG, Tsokos M, Kelley RI, Porter FD (2003) Lathosterolosis: an

- 1263 inborn error of human and murine cholesterol synthesis due to lathosterol 5-  
1264 desaturase deficiency. *Hum Mol Genet* 12: 1631-41
- 1265 Kumar D, Golchoubian B, Belevich I, Jokitalo E, Schlaitz AL (2019) REEP3 and  
1266 REEP4 determine the tubular morphology of the endoplasmic reticulum during  
1267 mitosis. *Mol Biol Cell* 30: 1377-1389
- 1268 Lamber EP, Siedenburg AC, Barr FA (2019) Rab regulation by GEFs and GAPs  
1269 during membrane traffic. *Curr Opin Cell Biol* 59: 34-39
- 1270 Langemeyer L, Perz A, Kummel D, Ungermann C (2018) A guanine nucleotide  
1271 exchange factor (GEF) limits Rab GTPase-driven membrane fusion. *The Journal of*  
1272 *biological chemistry* 293: 731-739
- 1273 Lees JA, Messa M, Sun EW, Wheeler H, Torta F, Wenk MR, De Camilli P, Reinisch  
1274 KM (2017) Lipid transport by TMEM24 at ER-plasma membrane contacts regulates  
1275 pulsatile insulin secretion. *Science* 355
- 1276 Li C, Luo X, Zhao S, Siu GK, Liang Y, Chan HC, Satoh A, Yu SS (2017) COPI-  
1277 TRAPP2 activates Rab18 and regulates its lipid droplet association. *EMBO J* 36:  
1278 441-457
- 1279 Li D, Zhao YG, Li D, Zhao H, Huang J, Miao G, Feng D, Liu P, Li D, Zhang H (2019)  
1280 The ER-Localized Protein DFCP1 Modulates ER-Lipid Droplet Contact Formation.  
1281 *Cell Rep* 27: 343-358 e5
- 1282 Liegel RP, Handley MT, Ronchetti A, Brown S, Langemeyer L, Linford A, Chang B,  
1283 Morris-Rosendahl DJ, Carpanini S, Posmyk R, Harthill V, Sheridan E, Abdel-Salam  
1284 GM, Terhal PA, Faravelli F, Accorsi P, Giordano L, Pinelli L, Hartmann B, Ebert AD  
1285 et al. (2013) Loss-of-function mutations in TBC1D20 cause cataracts and male  
1286 infertility in blind sterile mice and Warburg micro syndrome in humans. *Am J Hum*  
1287 *Genet* 93: 1001-14
- 1288 Lind GE, Raiborg C, Danielsen SA, Rognum TO, Thiis-Evensen E, Hoff G,  
1289 Nesbakken A, Stenmark H, Lothe RA (2011) SPG20, a novel biomarker for early  
1290 detection of colorectal cancer, encodes a regulator of cytokinesis. *Oncogene* 30:  
1291 3967-78
- 1292 Liu X, Salokas K, Tamene F, Jiu Y, Weldatsadik RG, Ohman T, Varjosalo M (2018)  
1293 An AP-MS- and BioID-compatible MAC-tag enables comprehensive mapping of  
1294 protein interactions and subcellular localizations. *Nat Commun* 9: 1188
- 1295 Martin S, Driessen K, Nixon SJ, Zerial M, Parton RG (2005) Regulated localization of  
1296 Rab18 to lipid droplets: effects of lipolytic stimulation and inhibition of lipid droplet  
1297 catabolism. *The Journal of biological chemistry* 280: 42325-35
- 1298 Nakamura H, Yamashita N, Kimura A, Kimura Y, Hirano H, Makihara H, Kawamoto  
1299 Y, Jitsuki-Takahashi A, Yonezaki K, Takase K, Miyazaki T, Nakamura F, Tanaka F,  
1300 Goshima Y (2016) Comprehensive behavioral study and proteomic analyses of  
1301 CRMP2-deficient mice. *Genes Cells* 21: 1059-1079
- 1302 Nicholson JM, Macedo JC, Mattingly AJ, Wangsa D, Camps J, Lima V, Gomes AM,  
1303 Doria S, Ried T, Logarinho E, Cimini D (2015) Chromosome mis-segregation and  
1304 cytokinesis failure in trisomic human cells. *Elife* 4



- 1305 Nowaczyk MJM, Wassif CA (1998) Smith-Lemli-Opitz Syndrome. In  
1306 *GeneReviews*((R)), Adam MP, Ardinger HH, Pagon RA, Wallace SE, Bean LJH,  
1307 Stephens K, Amemiya A (eds) Seattle (WA):
- 1308 Ong WY, Ng MP, Loke SY, Jin S, Wu YJ, Tanaka K, Wong PT (2013)  
1309 Comprehensive gene expression profiling reveals synergistic functional networks in  
1310 cerebral vessels after hypertension or hypercholesterolemia. *PloS one* 8: e68335
- 1311 Ozeki S, Cheng J, Tauchi-Sato K, Hatano N, Taniguchi H, Fujimoto T (2005) Rab18  
1312 localizes to lipid droplets and induces their close apposition to the endoplasmic  
1313 reticulum-derived membrane. *J Cell Sci* 118: 2601-11
- 1314 Perez-Riverol Y, Csordas A, Bai J, Bernal-Llinares M, Hewapathirana S, Kundu DJ,  
1315 Inuganti A, Griss J, Mayer G, Eisenacher M, Perez E, Uszkoreit J, Pfeuffer J,  
1316 Sachsenberg T, Yilmaz S, Tiwary S, Cox J, Audain E, Walzer M, Jarnuczak AF et al.  
1317 (2019) The PRIDE database and related tools and resources in 2019: improving  
1318 support for quantification data. *Nucleic Acids Res* 47: D442-D450
- 1319 Petkovic M, Jemaiel A, Daste F, Specht CG, Izeddin I, Vorkel D, Verbavatz JM,  
1320 Darzacq X, Triller A, Pfenninger KH, Tareste D, Jackson CL, Galli T (2014) The  
1321 SNARE Sec22b has a non-fusogenic function in plasma membrane expansion. *Nat*  
1322 *Cell Biol* 16: 434-44
- 1323 Platt FM, Wassif C, Colaco A, Dardis A, Lloyd-Evans E, Bembi B, Porter FD (2014)  
1324 Disorders of cholesterol metabolism and their unanticipated convergent mechanisms  
1325 of disease. *Annu Rev Genomics Hum Genet* 15: 173-94
- 1326 Pulido MR, Diaz-Ruiz A, Jimenez-Gomez Y, Garcia-Navarro S, Gracia-Navarro F,  
1327 Tinahones F, Lopez-Miranda J, Fruhbeck G, Vazquez-Martinez R, Malagon MM  
1328 (2011) Rab18 dynamics in adipocytes in relation to lipogenesis, lipolysis and obesity.  
1329 *PloS one* 6: e22931
- 1330 Raiborg C, Wenzel EM, Pedersen NM, Olsvik H, Schink KO, Schultz SW, Vietri M,  
1331 Nisi V, Bucci C, Brech A, Johansen T, Stenmark H (2015) Repeated ER-endosome  
1332 contacts promote endosome translocation and neurite outgrowth. *Nature* 520: 234-8
- 1333 Ran FA, Hsu PD, Wright J, Agarwala V, Scott DA, Zhang F (2013) Genome  
1334 engineering using the CRISPR-Cas9 system. *Nat Protoc* 8: 2281-2308
- 1335 Richter KN, Revelo NH, Seitz KJ, Helm MS, Sarkar D, Saleeb RS, D'Este E, Eberle  
1336 J, Wagner E, Vogl C, Lazaro DF, Richter F, Coy-Vergara J, Coceano G, Boyden ES,  
1337 Duncan RR, Hell SW, Lauterbach MA, Lehnart SE, Moser T et al. (2018) Glyoxal as  
1338 an alternative fixative to formaldehyde in immunostaining and super-resolution  
1339 microscopy. *EMBO J* 37: 139-159
- 1340 Rocha N, Kuijl C, van der Kant R, Janssen L, Houben D, Janssen H, Zwart W,  
1341 Neefjes J (2009) Cholesterol sensor ORP1L contacts the ER protein VAP to control  
1342 Rab7-RILP-p150 Glued and late endosome positioning. *The Journal of cell biology*  
1343 185: 1209-25
- 1344 Rossi M, D'Armiento M, Parisi I, Ferrari P, Hall CM, Cervasio M, Rivasi F, Balli F,  
1345 Vecchione R, Corso G, Andria G, Parenti G (2007) Clinical phenotype of  
1346 lathosterolosis. *Am J Med Genet A* 143A: 2371-81
- 1347 Roux KJ, Kim DI, Burke B, May DG (2018) BioID: A Screen for Protein-Protein  
1348 Interactions. *Curr Protoc Protein Sci* 91: 19 23 1-19 23 15

- 1349 Roux KJ, Kim DI, Raida M, Burke B (2012) A promiscuous biotin ligase fusion  
1350 protein identifies proximal and interacting proteins in mammalian cells. *The Journal*  
1351 *of cell biology* 196: 801-10
- 1352 Schlaitz AL, Thompson J, Wong CC, Yates JR, 3rd, Heald R (2013) REEP3/4  
1353 ensure endoplasmic reticulum clearance from metaphase chromatin and proper  
1354 nuclear envelope architecture. *Developmental cell* 26: 315-23
- 1355 Seaman MN, Harbour ME, Tattersall D, Read E, Bright N (2009) Membrane  
1356 recruitment of the cargo-selective retromer subcomplex is catalysed by the small  
1357 GTPase Rab7 and inhibited by the Rab-GAP TBC1D5. *J Cell Sci* 122: 2371-82
- 1358 Sidjanin DJ, Park AK, Ronchetti A, Martins J, Jackson WT (2016) TBC1D20  
1359 mediates autophagy as a key regulator of autophagosome maturation. *Autophagy*: 1-  
1360 17
- 1361 Silve S, Dupuy PH, Labit-Lebouteiller C, Kaghad M, Chalon P, Rahier A, Taton M,  
1362 Lupker J, Shire D, Loison G (1996) Emopamil-binding protein, a mammalian protein  
1363 that binds a series of structurally diverse neuroprotective agents, exhibits delta8-  
1364 delta7 sterol isomerase activity in yeast. *The Journal of biological chemistry* 271:  
1365 22434-40
- 1366 Sobajima T, Yoshimura SI, Maeda T, Miyata H, Miyoshi E, Harada A (2018) The  
1367 Rab11-binding protein RELCH/KIAA1468 controls intracellular cholesterol  
1368 distribution. *The Journal of cell biology* 217: 1777-1796
- 1369 Spang A (2012) The DSL1 complex: the smallest but not the least CATCHR. *Traffic*  
1370 13: 908-13
- 1371 Spang N, Feldmann A, Huesmann H, Bekbulat F, Schmitt V, Hiebel C, Koziollek-  
1372 Drechsler I, Clement AM, Moosmann B, Jung J, Behrends C, Dikic I, Kern A, Behl C  
1373 (2014) RAB3GAP1 and RAB3GAP2 modulate basal and rapamycin-induced  
1374 autophagy. *Autophagy* 10: 2297-309
- 1375 Svoboda MD, Christie JM, Eroglu Y, Freeman KA, Steiner RD (2012) Treatment of  
1376 Smith-Lemli-Opitz syndrome and other sterol disorders. *Am J Med Genet C Semin*  
1377 *Med Genet* 160C: 285-94
- 1378 Tagaya M, Arasaki K, Inoue H, Kimura H (2014) Moonlighting functions of the NRZ  
1379 (mammalian Dsl1) complex. *Front Cell Dev Biol* 2: 25
- 1380 Tinti M, Johnson C, Toth R, Ferrier DE, Mackintosh C (2012) Evolution of signal  
1381 multiplexing by 14-3-3-binding 2R-ohnologue protein families in the vertebrates.  
1382 *Open biology* 2: 120103
- 1383 Urnavicius L, Zhang K, Diamant AG, Motz C, Schlager MA, Yu M, Patel NA,  
1384 Robinson CV, Carter AP (2015) The structure of the dynactin complex and its  
1385 interaction with dynein. *Science* 347: 1441-1446
- 1386 Vazquez-Martinez R, Cruz-Garcia D, Duran-Prado M, Peinado JR, Castano JP,  
1387 Malagon MM (2007) Rab18 inhibits secretory activity in neuroendocrine cells by  
1388 interacting with secretory granules. *Traffic* 8: 867-82
- 1389 Wang H, Ma Q, Qi Y, Dong J, Du X, Rae J, Wang J, Wu WF, Brown AJ, Parton RG,  
1390 Wu JW, Yang H (2019) ORP2 Delivers Cholesterol to the Plasma Membrane in  
1391 Exchange for Phosphatidylinositol 4, 5-Bisphosphate (PI(4,5)P2). *Mol Cell* 73: 458-  
1392 473 e7



- 1393 Wang T, Li L, Hong W (2017) SNARE proteins in membrane trafficking. *Traffic* 18:  
1394 767-775
- 1395 Wassif CA, Kratz L, Sparks SE, Wheeler C, Bianconi S, Gropman A, Calis KA,  
1396 Kelley RI, Tierney E, Porter FD (2017) A placebo-controlled trial of simvastatin  
1397 therapy in Smith-Lemli-Opitz syndrome. *Genet Med* 19: 297-305
- 1398 Whitfield ST, Burston HE, Bean BD, Raghuram N, Maldonado-Baez L, Davey M,  
1399 Wendland B, Conibear E (2016) The alternate AP-1 adaptor subunit Apm2 interacts  
1400 with the Mil1 regulatory protein and confers differential cargo sorting. *Mol Biol Cell*  
1401 27: 588-98
- 1402 Wickner W (2010) Membrane fusion: five lipids, four SNAREs, three chaperones,  
1403 two nucleotides, and a Rab, all dancing in a ring on yeast vacuoles. *Annu Rev Cell*  
1404 *Dev Biol* 26: 115-36
- 1405 Williams C, Choudhury R, McKenzie E, Lowe M (2007) Targeting of the type II  
1406 inositol polyphosphate 5-phosphatase INPP5B to the early secretory pathway. *J Cell*  
1407 *Sci* 120: 3941-51
- 1408 Wu H, Carvalho P, Voeltz GK (2018) Here, there, and everywhere: The importance  
1409 of ER membrane contact sites. *Science* 361
- 1410 Xu D, Li Y, Wu L, Li Y, Zhao D, Yu J, Huang T, Ferguson C, Parton RG, Yang H, Li  
1411 P (2018) Rab18 promotes lipid droplet (LD) growth by tethering the ER to LDs  
1412 through SNARE and NRZ interactions. *The Journal of cell biology* 217: 975-995
- 1413 Yamamoto Y, Yurugi C, Sakisaka T (2017) The number of the C-terminal  
1414 transmembrane domains has the potency to specify subcellular localization of  
1415 Sec22c. *Biochem Biophys Res Commun* 487: 388-395
- 1416 Zhang T, Wong SH, Tang BL, Xu Y, Hong W (1999) Morphological and functional  
1417 association of Sec22b/ERS-24 with the pre-Golgi intermediate compartment. *Mol*  
1418 *Biol Cell* 10: 435-53
- 1419 Zhao K, Ridgway ND (2017) Oxysterol-Binding Protein-Related Protein 1L Regulates  
1420 Cholesterol Egress from the Endo-Lysosomal System. *Cell Rep* 19: 1807-1818
- 1421 Zhao L, Imperiale MJ (2017) Identification of Rab18 as an Essential Host Factor for  
1422 BK Polyomavirus Infection Using a Whole-Genome RNA Interference Screen.  
1423 *mSphere* 2
- 1424 Zhen Y, Stenmark H (2015) Cellular functions of Rab GTPases at a glance. *J Cell*  
1425 *Sci* 128: 3171-6
- 1426
- 1427

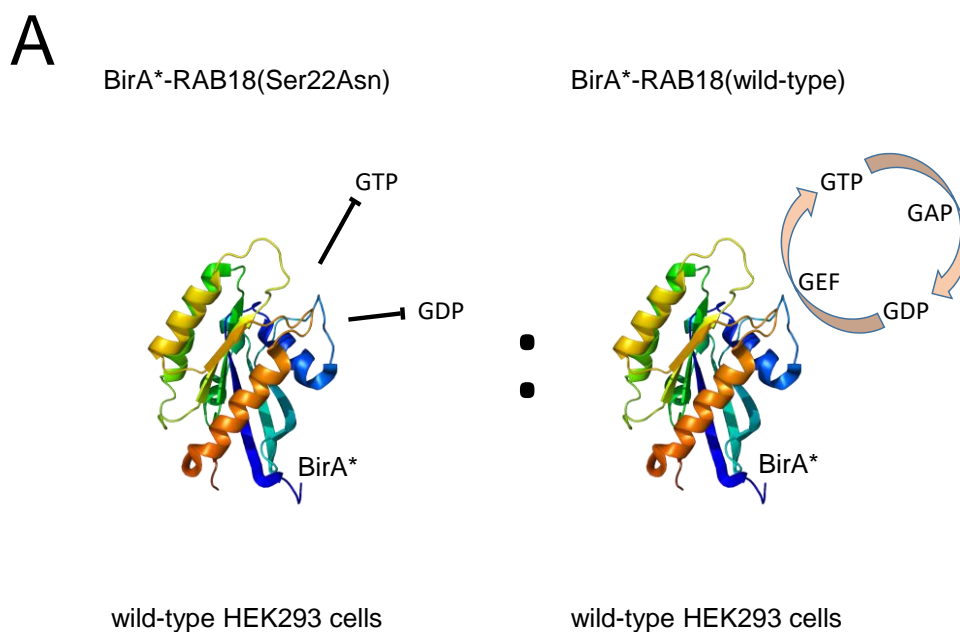

**B**

| Protein  | Ratio | Orthologue PPI<br>(Gillingham et al.,<br>2014) | Additional evidence                      |                                                                 |
|----------|-------|------------------------------------------------|------------------------------------------|-----------------------------------------------------------------|
| SCFD2    | 0.00  | Slh                                            | Gillingham et al., 2019                  | <b>RAB3GAP-<br/>dependent<br/>association in HeLa<br/>cells</b> |
| ZW10     | 0.00  | mit(1)15                                       | Xu et al., 2018; Gillingham et al., 2019 |                                                                 |
| NBAS     | 0.00  | rod                                            | Xu et al., 2018; Gillingham et al., 2019 |                                                                 |
| CAMSAP1  | 0.04  |                                                |                                          |                                                                 |
| FAM134B  | 0.36  |                                                |                                          |                                                                 |
| RINT1    | 0.41  | CG8605                                         | Xu et al., 2018                          |                                                                 |
| RAB3GAP2 | 1.58  | rab3-GAP                                       | Gerondopoulos et al., 2014               |                                                                 |
| RAB3GAP1 | 1.59  | CG31935                                        | Gerondopoulos et al., 2014               |                                                                 |
| TBC1D5   | 0.00  | CG8449                                         | Gillingham et al., 2019                  | <b>TRAPP1I-dependent<br/>association in HeLa<br/>cells</b>      |
| c15orf38 | 0.00  |                                                |                                          |                                                                 |
| SEC23IP  | 0.00  |                                                |                                          |                                                                 |
| ATP6AP2  | 0.29  |                                                |                                          |                                                                 |
| GORASP2  | 0.36  |                                                |                                          |                                                                 |
| GIGYF2   | 0.41  |                                                |                                          |                                                                 |
| TPR      | 0.41  |                                                |                                          |                                                                 |
| USP15    | 0.00  |                                                |                                          | <b>Present in HeLa<br/>dataset (n≥2)</b>                        |
| TMPO     | 0.00  |                                                |                                          |                                                                 |
| ARFGAP3  | 0.20  |                                                |                                          |                                                                 |
| ARFGAP2  | 0.31  |                                                |                                          |                                                                 |
| SLK      | 0.34  |                                                |                                          |                                                                 |
| NUP153   | 0.39  |                                                |                                          |                                                                 |
| ATG2B    | 0.43  |                                                |                                          |                                                                 |
| SCFD1    | 0.45  | Slh                                            | Gillingham et al., 2019                  |                                                                 |
| USE1     | 0.45  |                                                | Xu et al., 2018                          |                                                                 |
| TMX1     | 0.45  |                                                |                                          |                                                                 |
| CORO1B   | 0.47  |                                                |                                          |                                                                 |
| PREB     | 0.47  |                                                |                                          |                                                                 |
| SLC25A4  | 0.00  |                                                |                                          | <b>Absent in HeLa<br/>dataset (n≥2)</b>                         |
| LUZP1    | 0.00  |                                                |                                          |                                                                 |
| DPYSL2   | 0.34  |                                                | Nakamura et al., 2016                    |                                                                 |

1429 **Figure 1. Nucleotide-binding-dependent RAB18-associations in HEK293 cells.**

1430 (A) Schematic to show BirA\*-RAB18(Ser22Asn):BirA\*-RAB18(WT) comparison.

1431 RAB18 crystal structure from RCSB PDB code 1X3S. (B) Table to show putative

1432 nucleotide-binding-dependent RAB18-associations with BirA\*-

1433 RAB18(Ser22Asn):BirA\*-RAB18(WT) association ratios <0.5. Proteins orthologous

1434 to interactors identified by Gillingham et al. (2014) are indicated. Previous studies

1435 providing supporting evidence for interactions are indicated. Proteins are grouped

1436 according to their attributes in the HeLa cell dataset (Figure 2 and Table S2).

1437 Association ratios were derived individually following normalization by total spectral

1438 counts per condition. The full dataset is provided in table S1.

1439

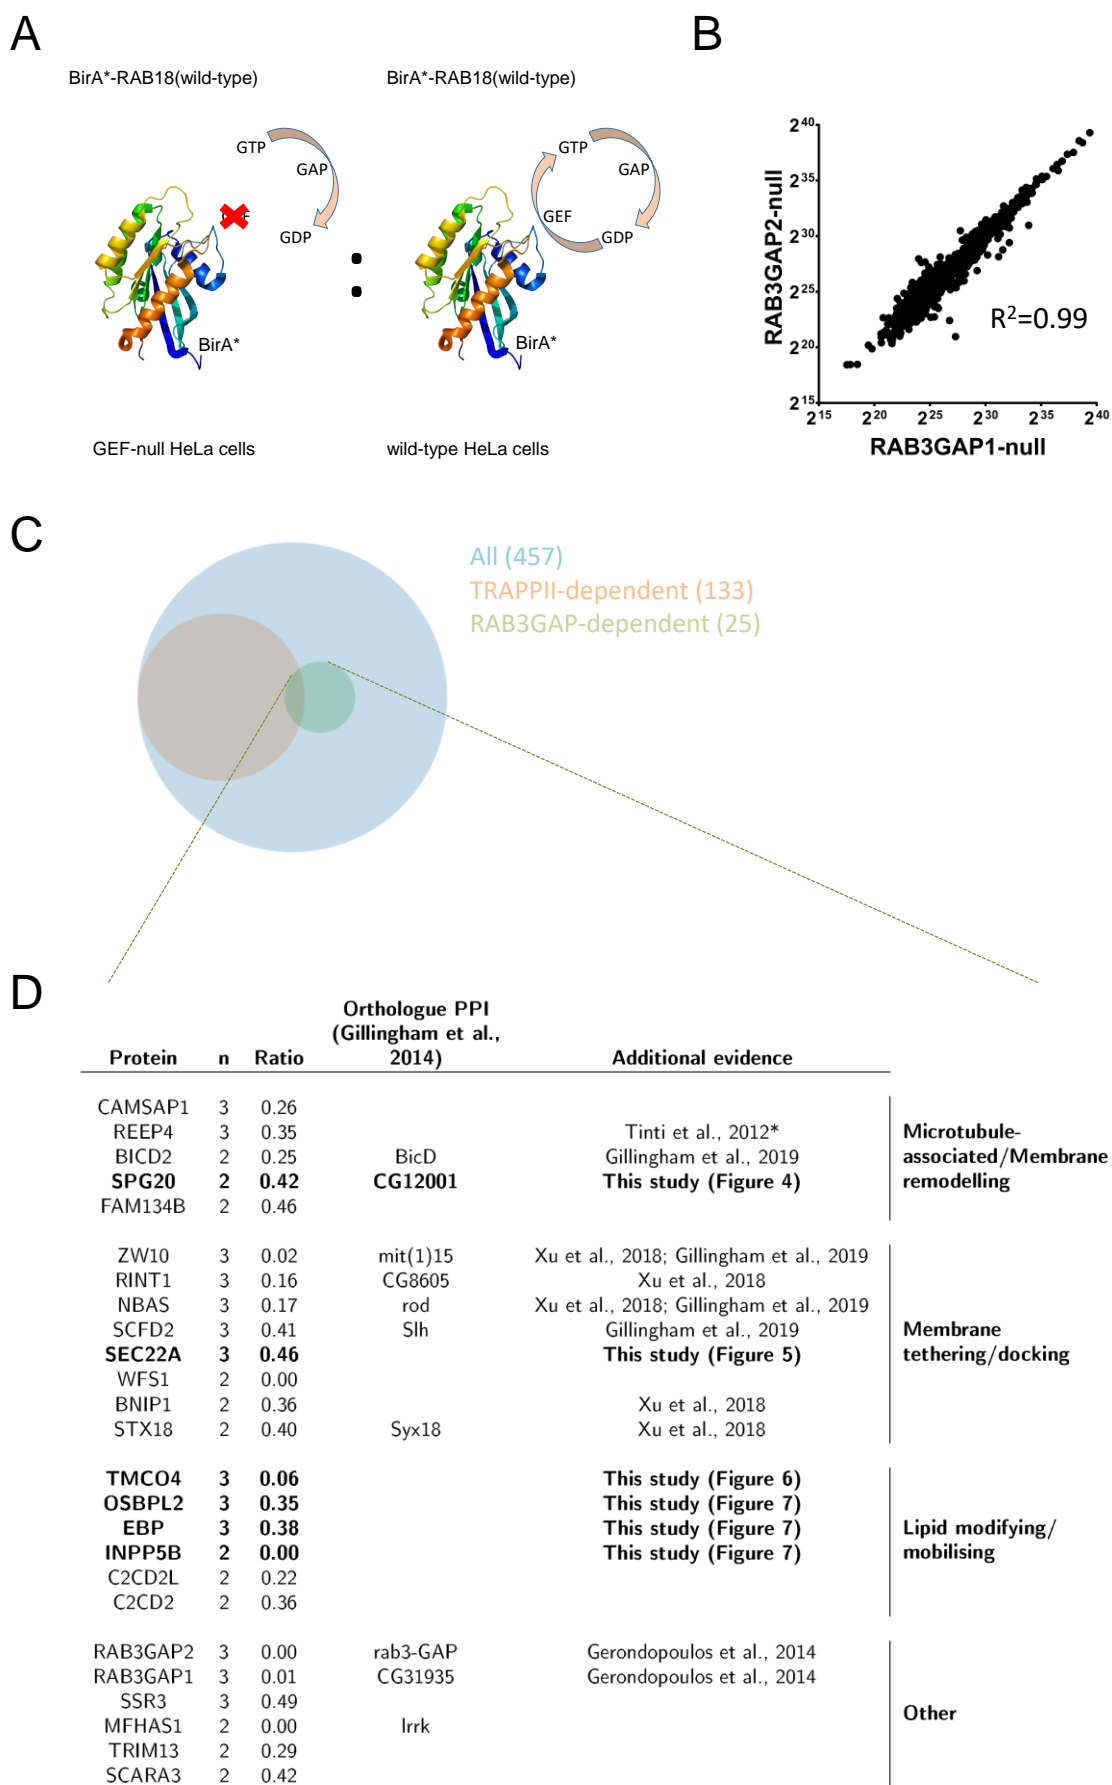

1441 **Figure 2. RAB3GAP-dependent RAB18-associations in HeLa cells.** (A)  
1442 Schematic to show comparison of BirA\*-RAB18(WT) in wild-type and guanine  
1443 nucleotide exchange factor (GEF)-null cells. RAB18 crystal structure from RCSB  
1444 PDB code 1X3S. (B) Plot to show correlation between non-zero LFQ intensities of  
1445 individual proteins identified in samples purified from RAB3GAP1- and RAB3GAP2-  
1446 null cells. (C) Venn diagram illustrating all RAB18-associations, TRAPP1I-dependent  
1447 interactions (TRAPPC9-null:wild-type association ratios <0.5) and RAB3GAP-  
1448 dependent associations (RAB3GAP1/2-null:wild-type association ratios <0.5). (D)  
1449 Table to show putative RAB18-associations with RAB3GAP1/2-null:wild-type  
1450 association ratios <0.5. Proteins orthologous to interactors identified by Gillingham et  
1451 al. (2014) are indicated. Previous studies providing supporting evidence for  
1452 interactions are indicated. Proteins are grouped according to their reported functions.  
1453 Association ratios were derived individually following normalization by RAB18 LFQ  
1454 intensity in each replicate experiment. The full dataset is provided in table S2.  
1455

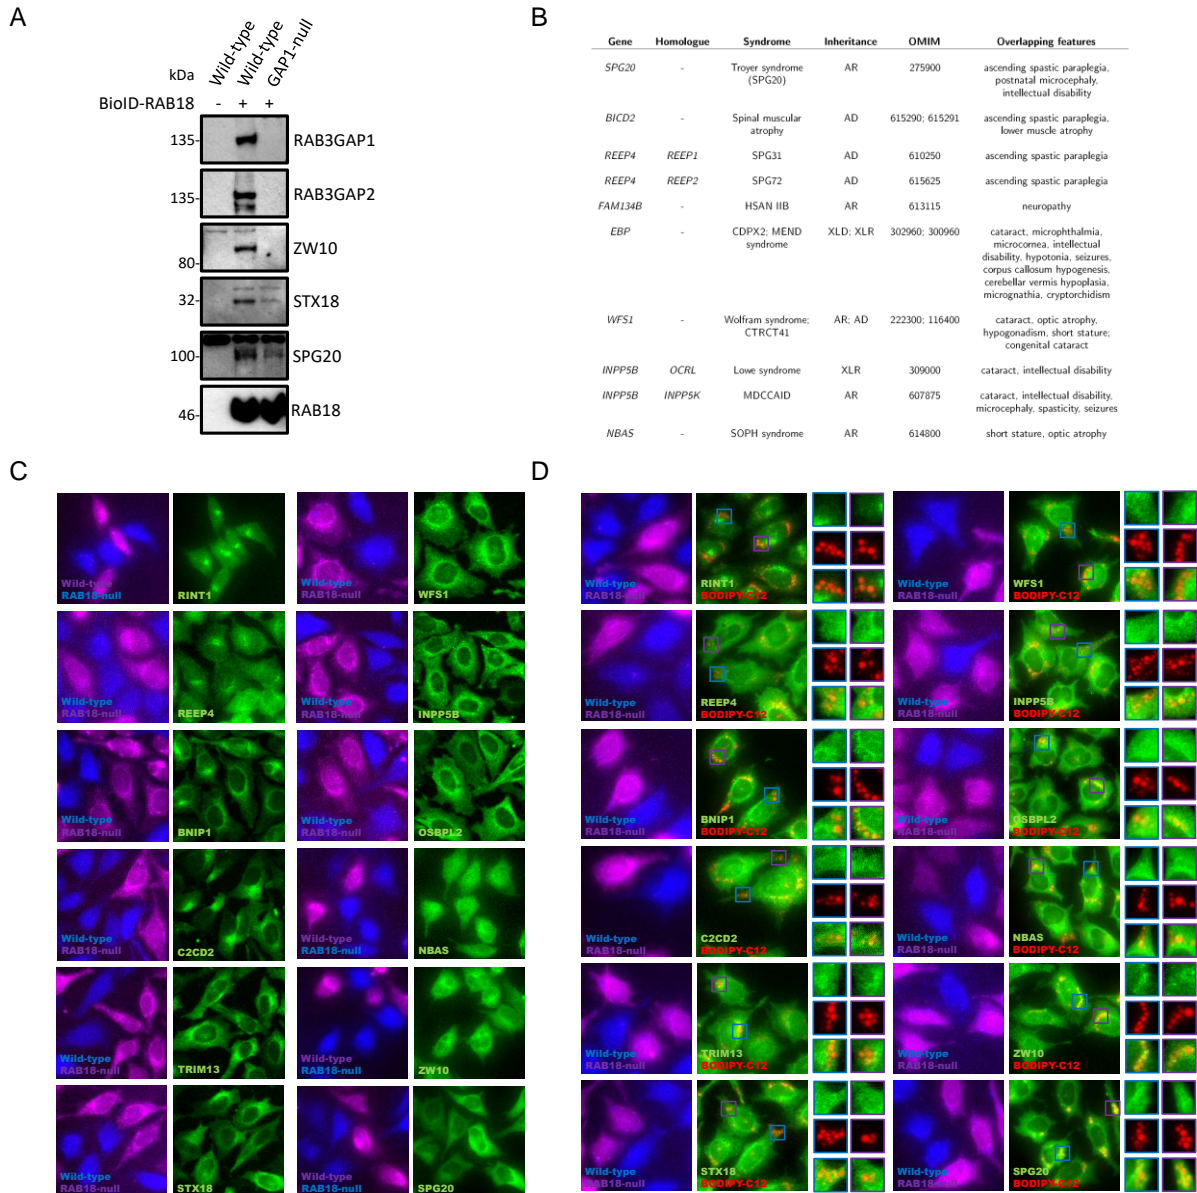

1456

1457

1458 **Figure 3. Initial validation of RAB3GAP-dependent RAB18-associations in**  
 1459 **HeLa cells.** (A) Western blotting of samples purified from wild-type and RAB3GAP1-  
 1460 null cells in an independent BioID experiment. Levels of selected proteins are  
 1461 consistent with association ratios in Figure 1C. (B) Table to show diseases with  
 1462 features overlapping those of Warburg Micro syndrome linked to genes encoding  
 1463 putative effector proteins or their homologues. (C) Comparative fluorescence  
 1464 microscopy of selected RAB18-associated proteins in wild-type and RAB18-null  
 1465 HeLa cells. Cells of different genotypes were labelled with CellTrace-Violet and  
 1466 CellTrace-Far Red reagents, corresponding to blue and magenta channels  
 1467 respectively. Cells were stained with antibodies against indicated proteins in green



1468 channel panels. (D) Comparative fluorescence microscopy of selected RAB18-  
1469 associated proteins in lipid-loaded wild-type and RAB18-null HeLa cells. Cells were  
1470 stained as above but were treated for 15 hours with 200 $\mu$ M oleic acid, 1 $\mu$ g/ml  
1471 BODIPY-558/568-C12 (Red channel) prior to fixation.  
1472

A

HeLa cells

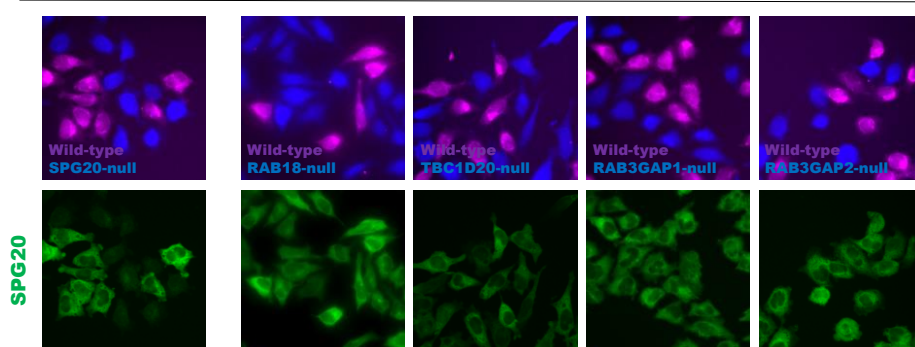

B

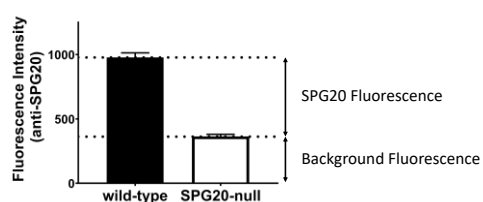

C

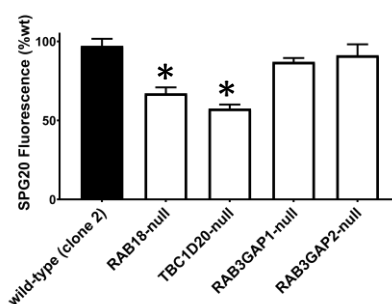

D

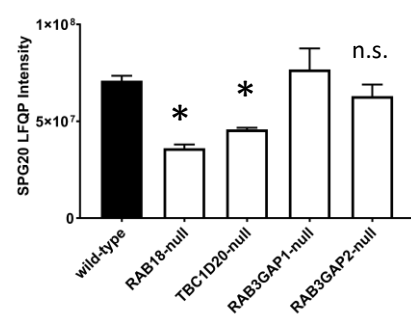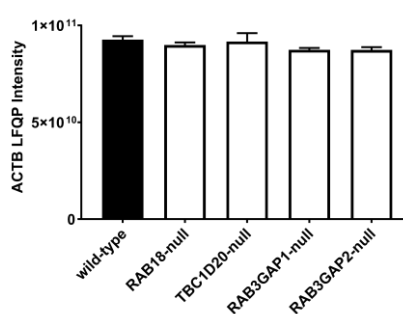

RPE1 cells

E

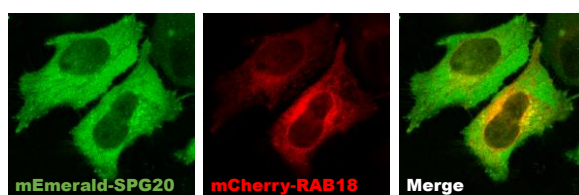

F

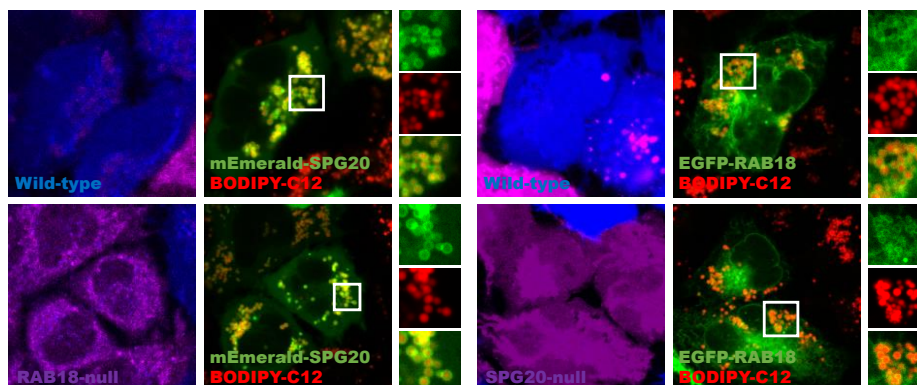

1474 **Figure 4. Levels of SPG20 are significantly reduced in RAB18-null and**  
1475 **TBC1D20-null HeLa and RPE1 cells.** (A) Comparative fluorescence microscopy of  
1476 SPG20 in wild-type and mutant HeLa cell lines. Wild-type and mutant cells of the  
1477 indicated genotypes were labelled with CellTrace-Far Red and CellTrace-Violet and  
1478 reagents respectively (magenta and blue channels). Cells were stained with an  
1479 antibody against SPG20 (green channel) (B) Quantification of SPG20 fluorescence  
1480 in wild-type cells by direct comparison with SPG20-null cells. (C) Quantification of  
1481 SPG20 fluorescence (%wt) in cells of different genotypes. Data were derived from  
1482 analysis of at least 18 frames – each containing >5 wild-type and >5 mutant cells –  
1483 per genotype. \* $p < 0.001$ . (D) LFQ intensities for SPG20 (Q8N0X7) and  $\beta$ -Actin  
1484 (P60709) in whole-cell lysates of RPE1 cells of the indicated genotypes.  $n=3$ ;  
1485 \* $p < 0.05$  following FDR correction. Full dataset provided in table S3. Error bars  
1486 represent s.e.m. (E) Confocal micrograph to show localization of exogenous  
1487 mEmerald-SPG20 (Green) and mCherry-RAB18 (Red) in HeLa cells. (F) Confocal  
1488 micrographs to show localization of exogenous mEmerald-SPG20 (Green; left  
1489 panels) and EGFP-RAB18 (Green; right panels) in HeLa cells loaded with 200 $\mu$ M  
1490 oleic acid, 1 $\mu$ g/ml BODIPY-558/568-C12 (Red channel). Wild-type and mutant cells  
1491 of the indicated genotypes were labelled with CellTrace-Violet and CellTrace-Far  
1492 Red reagents respectively (magenta and blue channels).  
1493

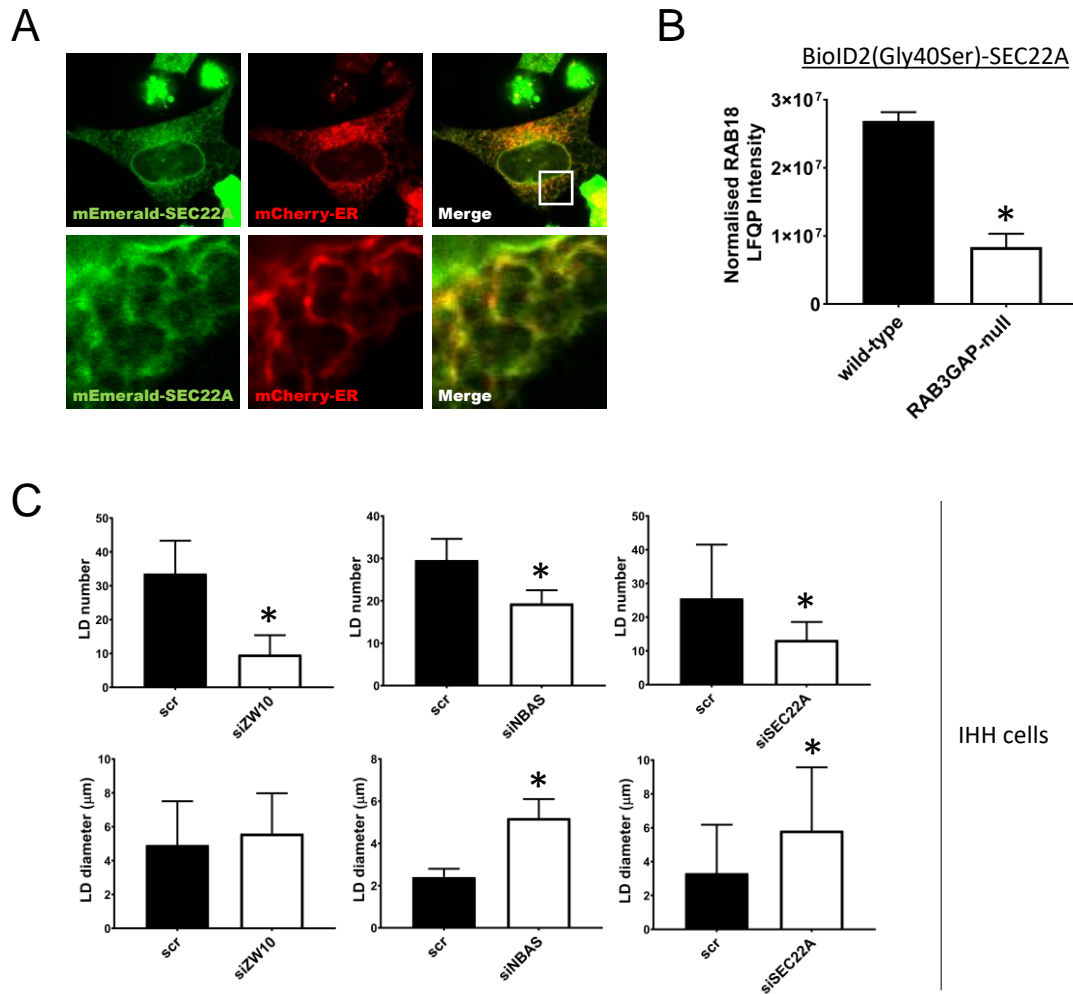

1494

1495 **Figure 5. SEC22A associates with RAB18 and influences LD morphology.** (A)

1496 Confocal micrograph to show overlapping localization of exogenous mEmerald-

1497 SEC22A (Green) and mCherry-ER (Red) in HeLa cells. (B) RAB18 LFQ intensities

1498 from a reciprocal BioID experiment showing a reduced association between

1499 BioID2(Gly40Ser)-SEC22A and endogenous RAB18 in RAB3GAP-null compared to

1500 wild-type HeLa cells. Data were adjusted to account for non-specific binding of

1501 RAB18 to beads and normalized by SEC22A LFQ intensities in each replicate

1502 experiment. Error bars represent s.e.m. Data for other BioID2(Gly40Ser)-SEC22A-

1503 associated proteins are provided in table S5. (C) Bar graphs to show effects of

1504 ZW10, NBAS and SEC22A knockdowns on lipid droplet number and diameter.

1505 siRNA-treated IHH cells were loaded with 200nM BSA-conjugated oleate, fixed and

1506 stained with BODIPY and DAPI, and imaged. Images were analysed using ImageJ.

1507 Data are derived from measurements from >100 cells/condition and are

1508 representative of three independent experiments. Error bars represent SD. \*p<0.001

A

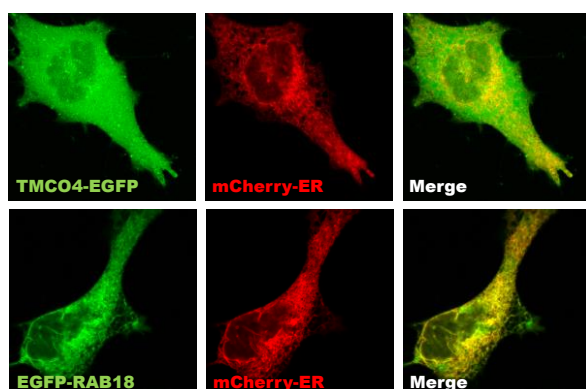

B

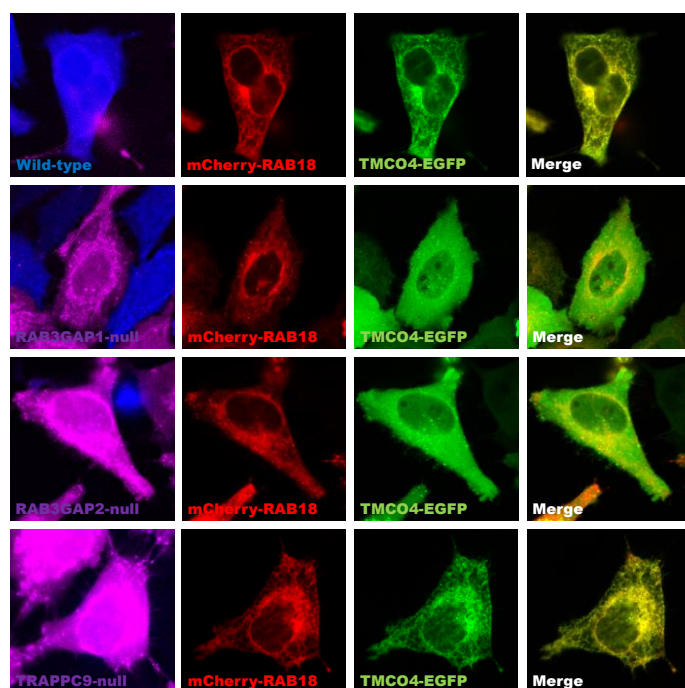

C

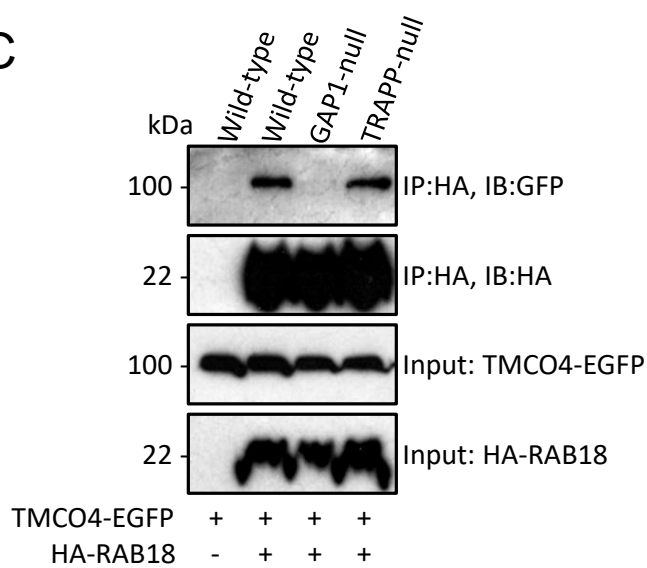

1510 **Figure 6. mCherry-RAB18 recruits TMCO4-EGFP to the ER membrane in a**  
1511 **RAB3GAP-dependent manner.** (A) Confocal micrographs to show diffuse  
1512 localization of exogenous TMCO4-EGFP (Green) compared to mCherry-ER (Red)  
1513 and overlapping localization of exogenous EGFP-RAB18 (Green) and mCherry-ER  
1514 in HeLa cells. (B) Confocal micrographs to show localization of exogenous mCherry-  
1515 RAB18 and TMCO4-EGFP in wild-type cells and in mutant cells of different  
1516 genotypes. Wild-type and mutant cells of the indicated genotypes were labelled with  
1517 CellTrace-Violet and CellTrace-Far Red reagents respectively (magenta and blue  
1518 channels). (C) Immunoprecipitation of exogenous HA-RAB18 from HeLa cells of  
1519 different genotypes. Cells were transfected with the indicated constructs and lysed  
1520 24 hours post-transfection. Anti-HA immunoprecipitates and input samples were  
1521 subjected to SDS-PAGE and immunostaining for HA and GFP.  
1522



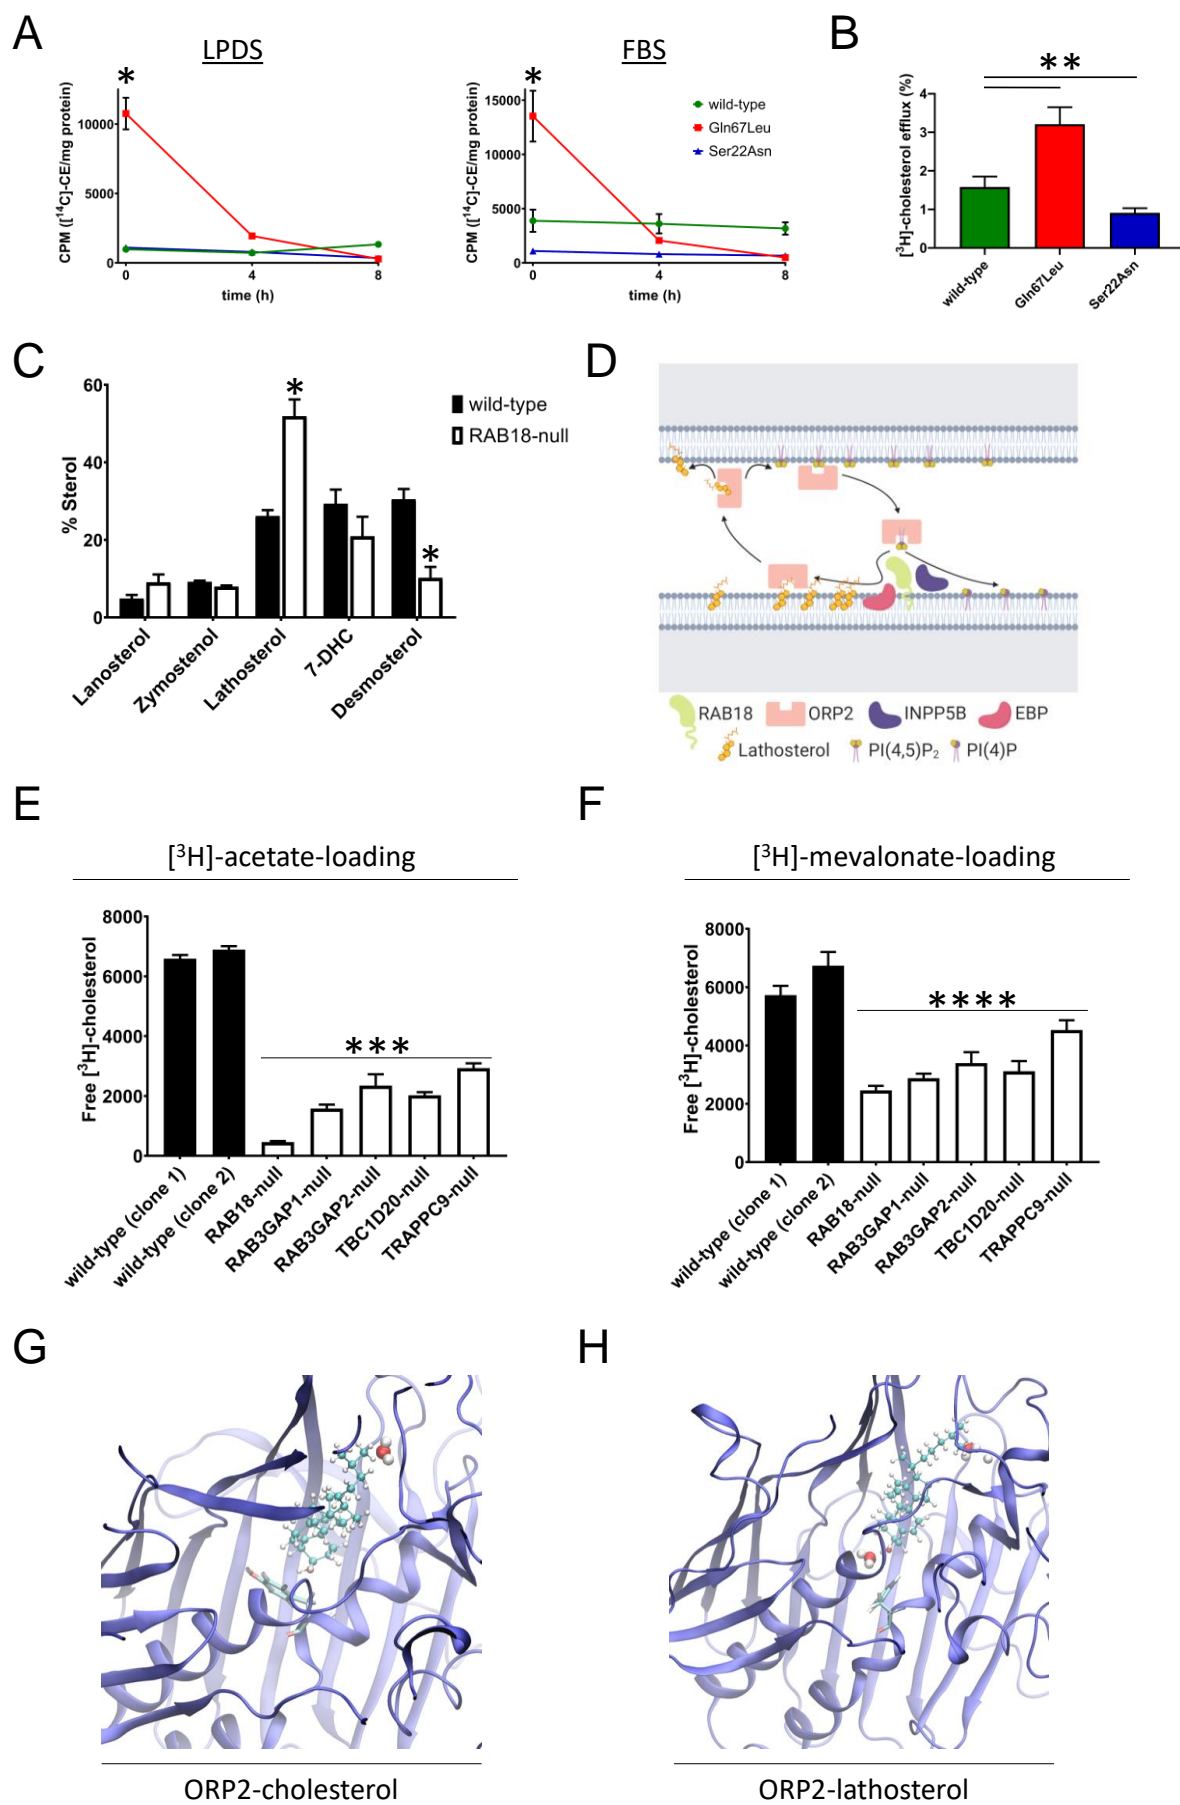

1524 **Figure 7. RAB18 is involved in the mobilization and biosynthesis of**  
1525 **cholesterol.** (A) Plots to show cholesteryl ester (CE) loading and efflux. CHO cells,  
1526 stably expressing RAB18(WT), RAB18(Gln67Leu) and RAB18(Ser22Asn), were  
1527 incubated with [<sup>14</sup>C]-oleate, for 24 hours, in the presence of lipoprotein depleted  
1528 serum (LPDS)(Left panel) or FBS (Right panel). Following lipid extraction, thin layer  
1529 chromatography (TLC) was used to separate CE, and radioactivity was measured by  
1530 scintillation counting. Measurements were made at t=0 and at 4 and 8 hours  
1531 following the addition of 50µg/ml high density lipoprotein (HDL) to the cells. (B) Bar  
1532 graph to show cholesterol efflux. The CHO cells were incubated with [<sup>3</sup>H]-  
1533 cholesterol, for 24 hours, in the presence of FBS. After washing, they were then  
1534 incubated with 25µg/ml apolipoprotein A-I for 5 hours. The quantity of [<sup>3</sup>H]-  
1535 cholesterol in the media is shown as a percentage of the total cellular radioactivity  
1536 (mean±SD). (C) Bar graph to show sterols profile in wild-type and RAB18-null HeLa  
1537 cells. Cells were grown in media supplemented with LPDS for 48 hours. Extracted  
1538 sterols were analysed by gas chromatography-mass spectrometry (GC-MS). %  
1539 Sterol was calculated as a proportion of total quantified sterols, excluding  
1540 cholesterol, following normalization to a 5α-cholestane internal standard. n=3 (D)  
1541 Model for lathosterol mobilization mediated by RAB18. ORP2 binds PI(4,5)P<sub>2</sub> on an  
1542 apposed membrane. RAB18 interacts with ORP2 and INPP5B promoting the  
1543 hydrolysis of PI(4,5)P<sub>2</sub> to PI(4)P and maintaining a PI(4,5)P<sub>2</sub> concentration gradient.  
1544 RAB18 coordinates the production of lathosterol by EBP and its subsequent  
1545 mobilization by ORP2. (E) Bar graph to show incorporation of [<sup>3</sup>H]-acetate into  
1546 cholesterol in a panel of HeLa cell lines. Cells were grown in LPDS-media for 24  
1547 hours then incubated with 10µCi/well [<sup>3</sup>H]-acetate for 24 hours. TLC was used to  
1548 separate free cholesterol and radioactivity was quantified by scintillation counting  
1549 (n=4; mean±SD). (F) Bar graph to show incorporation of [<sup>3</sup>H]-mevalonate into  
1550 cholesterol in the cell lines. Cells were grown LPDS-media for 24 hours, then  
1551 incubated with 5µCi/well [<sup>3</sup>H]-mevalonate for 24 hours. TLC was used to separate  
1552 free cholesterol and radioactivity was quantified by scintillation counting (n=4;  
1553 mean±SD). (G) Still image from a molecular dynamics model of the ORP2 OSBP-  
1554 related domain (ORD) complexed with cholesterol. Position of ORP2 Tyr110  
1555 (NP\_653081) is shown. (H) Still image from a molecular dynamics model of the  
1556 ORP2-ORD complexed with lathosterol. Positions of ORP2 Tyr110 and proximal  
1557 water molecules are shown. \*p<0.01, \*\*p<0.001, \*\*\*p<0.0005, \*\*\*\*p<0.005.
